# Supplementary material for: The molecular mechanism of load adaptation by branched actin networks
Source: eLife. 2022 Jun 24;11:e73145. doi: 10.7554/eLife.73145 (PMC9328761; doi:10.7554/eLife.73145)
Supplement: Figure 1—figure supplement 1—source data 1. [file elife-73145-fig1-figsupp1-data1.xlsx]

## Sheet: Figure 1 - Figure Supplement 1B
	Figure 1 - Figure Supplement 1B
		actin fluorescence intensity [au]				CP fluorescence intensity [au]				Arp2/3 fluorescence intensity [au]
	distance [um]	0 Pa network	255 Pa network	1020 Pa network		0 Pa network	255 Pa network	1020 Pa network		0 Pa network	255 Pa network	1020 Pa network
	0	7.8657	13.3694	31.4841		-5.70703	10.9895	66.566		2.37654	20.8884	54.84
	0.08333	5.9591	17.0268	21.7413		-5.43266	20.3553	66.5906		3.14054	22.8276	58.4073
	0.16666	-1.7385	10.3141	28.0863		-11.3024	11.3394	65.5245		10.8944	32.5384	36.2345
	0.24999	7.2292	10.5981	32.9071		3.30353	18.3194	53.0403		6.06054	18.5235	55.908
	0.33332	-1.4936	17.2628	30.5334		-5.35388	20.0088	63.9664		6.14994	20.1513	49.1066
	0.41665	-2.9653	22.8515	24.9508		-1.86891	16.2832	70.2291		-2.18576	21.8605	55.5065
	0.49998	-2.5119	15.6785	21.164		-2.17057	6.00505	48.8998		-11.5078	15.8498	46.8239
	0.58331	2.311	19.0689	32.2222		17.7734	22.3734	57.0386		-4.25236	24.9962	50.9998
	0.66664	6.7505	13.3311	32.4211		-0.08401	32.5701	87.3745		-6.33556	28.4105	63.341
	0.74997	0.8223	7.28562	35.5723		-2.28523	24.7891	60.272		9.70224	25.8319	54.1996
	0.8333	-0.4032	17.1113	26.2632		-0.29688	50.8246	47.1161		6.51364	16.5485	61.987
	0.91663	-0.4462	19.9724	40.0003		-0.29669	30.5194	49.5014		6.16954	15.9841	79.7206
	0.99996	8.569	20.4624	38.292		-3.62904	22.8053	68.1685		0.05384	27.0108	69.5222
	1.08329	2.9655	23.4228	29.9213		5.08817	20.9642	72.9078		9.87994	34.9871	67.0267
	1.16662	1.5177	17.9301	47.6863		5.63944	28.7915	90.657		-3.35436	30.8091	65.7803
	1.24995	3.2354	20.4137	30.9848		14.8005	43.7355	43.5415		-0.34856	31.7133	73.3062
	1.33328	0.5856	11.409	40.1424		17.8825	39.0008	55.615		1.59404	34.2764	75.5497
	1.41661	-0.8454	16.5261	44.9115		28.3669	29.887	56.5868		4.89414	50.815	80.692
	1.49994	5.7107	27.3418	45.1283		33.9288	48.3406	57.9946		5.68254	41.3674	113.647
	1.58327	0.3309	23.7657	53.5951		29.2954	34.3409	66.8354		1.68004	54.5403	108.641
	1.6666	4.6017	19.6579	47.3325		20.7952	49.0468	58.5398		5.12894	54.3668	87.1665
	1.74993	4.4736	24.9018	61.8102		27.4255	38.2595	66.3828		0.84064	63.3409	93.6904
	1.83326	9.3299	16.5589	58.5463		13.8112	44.0891	77.9965		-10.3396	58.5343	118.506
	1.91659	3.6335	28.4632	63.9589		11.1925	66.5922	87.7922		15.2384	85.8521	109.354
	1.99992	6.0862	15.0603	77.6482		13.1609	92.7755	93.7312		5.86774	123.452	131.66
	2.08325	4.6057	30.7388	79.0804		19.7881	93.2788	101.462		1.21524	131.372	117.375
	2.16658	7.1461	31.9957	72.7695		17.9985	65.8585	93.4826		7.80874	140.476	109.345
	2.24991	6.3861	35.7111	74.0097		7.93933	72.1051	96.5453		2.28774	118.438	121.091
	2.33324	4.3857	38.1733	75.3873		12.0917	62.4487	114.441		-3.50446	91.9317	132.05
	2.41657	17.1835	41.5511	76.5132		0.44639	51.6026	111.101		0.19404	74.5798	144.117
	2.4999	5.6874	41.7651	72.7528		6.53182	55.2743	106.243		1.40644	56.7326	148.474
	2.58323	12.6738	42.9737	86.064		6.66117	57.7623	86.6317		12.3055	69.457	162.784
	2.66656	21.8489	40.7079	87.6516		8.43275	62.2285	102.106		15.0208	55.8372	178.937
	2.74989	24.8411	44.3187	96.9757		26.5369	55.3944	128.91		26.2431	63.3137	185.861
	2.83322	16.2912	45.8493	106.537		21.331	48.6294	124.431		13.9115	69.5262	207.258
	2.91655	19.7113	50.641	111.635		11.9334	66.3272	129.613		16.6969	60.3088	208.411
	2.99988	23.7592	52.1042	118.892		15.8182	43.3428	124.768		18.1378	64.1692	188.899
	3.08321	22.015	61.121	121.698		17.6661	39.7176	121.486		12.5374	57.474	202.963
	3.16654	14.2932	45.7804	116.65		-0.86804	66.2482	146.493		12.2027	50.5408	192.651
	3.24987	15.6298	56.6701	136.945		6.278	55.5408	126.172		6.80974	68.9708	191.521
	3.3332	27.2418	56.3289	143.6		23.8371	44.0185	124.399		18.265	85.3257	215.227
	3.41653	18.7509	61.9633	146.756		8.14811	51.3614	140.641		12.7446	69.0988	247.174
	3.49986	23.5045	70.371	147.841		7.70195	50.4327	154.429		22.3499	84.8709	227.899
	3.58319	19.8031	72.3607	163.81		19.7708	69.3786	166.023		18.4968	86.7116	253.278
	3.66652	20.6367	73	162.54		18.8575	69.7626	140.259		23.5174	104.474	260.51
	3.74985	22.976	81.0394	182.122		6.96947	50.3691	146.479		21.016	87.4785	259.478
	3.83318	25.6135	86.3253	203.315		13.4503	63.1994	160.366		19.8994	96.0456	262.235
	3.91651	21.9136	89.4297	210.625		16.6456	71.8046	172.949		15.4821	105.093	292.229
	3.99984	36.1788	91.6017	231.279		18.8112	61.6275	203.716		19.9375	124.679	290.662
	4.08317	36.7404	112.667	215.734		12.3691	81.9073	173.184		18.0688	114.664	316.991
	4.1665	40.8923	107.82	230.898		7.61999	79.0854	197.441		23.3857	115.939	303.954
	4.24983	41.9492	101.223	249.638		8.94469	66.8411	191.927		12.3125	121.132	319.623
	4.33316	35.6828	103.162	273.969		23.1787	78.5566	219.562		10.6351	122.789	356.116
	4.41649	42.8904	114.606	298.432		15.0013	91.0731	209.423		16.5474	132.549	382.842
	4.49982	53.7852	135.021	300.77		17.3591	80.552	227.023		15.0739	143.461	389.977
	4.58315	44.7811	127.148	317.333		22.7691	87.8791	245.392		14.8349	145.721	402.22
	4.66648	47.7104	145.014	347.132		35.8379	85.8952	241.067		16.0634	136.781	466.026
	4.74981	48.6645	149.407	375.013		34.9941	85.6779	246.015		15.682	177.287	497.332
	4.83314	61.6097	162.315	447.715		44.0058	98.5221	279.911		42.9003	217.608	534.852
	4.91647	63.2865	173.992	478.017		45.5727	121.46	274.962		39.8008	210.299	614.44
	4.9998	72.8199	202.378	512.794		64.8607	118.414	295.255		44.3887	255.779	701.108
	5.08313	86.5797	257.956	599.987		92.2111	152.081	335.627		42.8461	309.64	789.832
	5.16646	86.7377	276.037	673.157		112.418	164.326	373.374		50.879	369.715	924.918
	5.24979	112.778	320.975	794.702		149.23	160.823	447.99		74.1449	439.487	1113.13
	5.33312	135.398	425.951	948.296		151.844	214.563	539.375		95.3142	522.677	1322.61
	5.41645	155.29	508.005	1159.99		170.004	237.148	630.399		125.124	629.403	1521.1
	5.49978	181.883	600.299	1409.87		163.447	275.664	781.266		129.133	672.367	1696.05
	5.58311	230.168	711.941	1639.02		175.765	337.546	946.277		134.951	714.025	1797.12
	5.66644	271.449	788.006	1881.06		170.795	441.667	1094.24		138.739	736.304	1920.26
	5.74977	309.843	862.366	1984.35		174.786	490.894	1244.39		141.593	797.599	2037.26
	5.8331	297.861	890.371	2082.14		159.171	513.71	1312.05		137.571	817.948	2110.84
	5.91643	318.555	870.955	2157.55		168.932	558.448	1401.53		145.873	843.848	2194.27
	5.99976	313.396	902.055	2198.85		167.593	548.118	1421.58		178.538	838.2	2246.41
	6.08309	332.892	932.812	2159.35		200.129	552.68	1454.23		190.036	833.571	2290.73
	6.16642	342.895	940.708	2180.43		204.726	521.129	1557.83		167.875	855.054	2246.43
	6.24975	342.323	940.892	2126.12		179.671	531.451	1554.29		169.835	825.034	2276.69
	6.33308	340.529	961.625	2176.17		182.823	526.532	1526.72		184.841	829.714	2246.61
	6.41641	349.914	975.722	2189.96		182.741	538.452	1561.3		204.005	843.285	2257.87
	6.49974	329.01	976.596	2166.28		196.846	569.367	1549.2		211.835	871.957	2283.86
	6.58307	332.022	992.861	2152.13		206.225	565.389	1541.68		196.614	893.817	2273.6
	6.6664	339.901	956.607	2186.16		191.597	600.903	1554.19		197.844	902.939	2322.82
	6.74973	328.091	932.615	2172.27		181.771	618.07	1529.77		189.195	885.806	2322.7
	6.83306	318.929	929.693	2117.35		178.129	624.117	1549.45		188.36	938.472	2278.44
	6.91639	344.291	919.71	2127.09		168.705	645.857	1463.92		185.747	937.89	2301.4
	6.99972	320.729	924.739	2143.06		177.671	678.628	1367.23		190.848	938.61	2226.21
	7.08305	331.604	933.177	2092.58		194.366	696.478	1326.14		189.296	942.58	2141.68
	7.16638	323.274	939.039	2082.51		171.725	669.898	1275.15		202.413	926.884	2195.59
	7.24971	336.277	928.487	2075.75		177.428	668.464	1326.23		190.636	931.713	2207.9
	7.33304	334.667	902.303	2069.11		180.806	648.286	1404.08		169.233	925.694	2238.45
	7.41637	323.051	925.112	2085.38		186.278	606.471	1439.02		167.201	913.636	2266.39
	7.4997	330.179	908.76	2055.88		182.424	571.663	1439.15		184.702	913.639	2272.27
	7.58303	325.119	939.114	2030.35		187.043	516.806	1443.41		210.123	893.304	2249.6
	7.66636	322.62	908.493	2067.66		196.632	535.991	1437.99		223.329	894.861	2302.67
	7.74969	323.94	873.819	2074.88		199.119	517.073	1420.83		228.444	885.973	2386.48
	7.83302	317.842	896.2	2043.22		189.568	521.446	1428.37		195.965	864.793	2433.9
	7.91635	313.812	866.043	2106.67		208.665	540.927	1465.06		193.237	873.943	2376.71
	7.99968	317.236	884.323	2023.96		216.482	602.437	1449.87		187.832	860.853	2337.74
	8.08301	318.33	885.491	2038.1		229.461	654.471	1429.34		188.671	878.023	2287.02
	8.16634	321.492	892.606	2104.25		207.103	657.139	1406.91		179.716	872.932	2248.09
	8.24967	299.521	844.12	2096.06		218.731	670.19	1414.3		179.152	852.782	2281.84
	8.333	309.196	870.821	2022.34		188.625	654.359	1417.82		201.088	834.695	2286.07
	8.41633	325.267	863.8	2001.01		181.825	666.259	1402.7		206.872	845.784	2242.95
	8.49966	327.241	870.574	2031.9		164.667	680.557	1351.15		188.773	907.697	2245
	8.58299	339.172	886.253	2017.29		173.153	692.346	1348.7		195.258	906.317	2186.46
	8.66632	329.412	860.541	2083.05		188.998	634.93	1301.02		183.319	894.044	2156.2
	8.74965	320.907	855.811	2057.18		179.28	590.412	1280.33		182.959	855.252	2113.45
	8.83298	332.599	870.024	2067.52		188.784	576.005	1251.99		174.094	818.256	2083.19
	8.91631	333.052	882.055	2122.43		202.062	554.934	1275.26		173.83	806.122	2124.82
	8.99964	328.66	836.529	2148.41		214.453	562.547	1197.3		153.24	775.85	2120.07
	9.08297	332.301	847.784	2088.98		217.163	566.452	1162.25		155.819	818.703	2092.89
	9.1663	319.864	875.248	2042.08		228.826	549.872	1113.21		143.945	795.305	2100.65
	9.24963	328.9	863.372	2098.54		214.807	530.083	1123.13		151.47	819.754	2129.43
	9.33296	323.714	876.972	2064.9		199.706	553.296	1087.51		160.579	816.215	2200.94
	9.41629	322.279	848.946	2019.18		189.158	617.148	1114.4		166.68	805.036	2161.02
	9.49962	303.868	857.078	2018.96		210.517	616.415	1083.67		182.091	808.34	2121.39
	9.58295	322.217	862.862	2013.39		186.846	639.699	1118.58		171.552	808.803	2117
	9.66628	319.162	863.094	2024.35		193.362	631.353	1132.71		159.037	832.168	2171.33
	9.74961	307.244	861.336	2046.82		197.743	612.826	1114.68		136.877	831.276	2198.47
	9.83294	326.646	850.332	2033.54		188.283	609.791	1178.29		131.271	789.78	2193.62
	9.91627	315.368	880.123	2033.88		175.96	569.546	1230.51		137.926	781.476	2221.18
	9.9996	305.433	882.165	2000.02		184.704	572.003	1256.26		141.992	825.623	2162.89
	10.0829	317.64	850.85	2082.25		206.965	538.439	1267.42		141.477	802.332	2077.21
	10.1663	320.17	848.213	2067.4		211.294	537.662	1235.5		141.938	766.032	2046.08
	10.2496	323.901	860.871	2130.37		223.171	518.182	1222.07		157.14	785.844	2038.02
	10.3329	325.342	857.704	2063.11		209.74	549.035	1198.53		158.151	758.57	2010.91
	10.4162	316.657	839.637	2050.18		207.655	531.903	1171.3		162.479	747.296	1978.34
	10.4996	307.885	847.206	2056.92		202.121	529.518	1089.45		190.654	776.756	1985.92
	10.5829	317.846	857.435	2070.6		207.487	517.974	1131.01		177.737	774.307	2019.69
	10.6662	308.711	848.893	2064.8		190.287	511.237	1161.79		195.365	811.138	2046.76
	10.7496	309.198	843.797	2055.71		175.964	521.531	1187.1		193.685	841.309	2042.69
	10.8329	315.63	839.96	2035.76		177.855	482.428	1155.82		182.053	834.333	2064.37
	10.9162	316.083	814.022	2006.78		172.326	485.885	1124.59		191.574	819.16	2107.51
	10.9996	312.259	832.29	2021.87		160.348	503.931	1137.75		188.318	811.686	2130
	11.0829	307.348	810.848	2047.46		160.222	524.909	1146.32		185.049	802.308	2132.1
	11.1662	322.167	803.912	2057.15		161.872	528.99	1119.32		154.326	761.719	2177.77
	11.2495	325.906	781.695	2029.58		150.91	573.489	1173.1		164.022	764.351	2183.27
	11.3329	307.2	776.239	2039.02		143.782	605.313	1181.17		170.931	800.727	2172.47
	11.4162	316.794	782.829	1988.16		145.193	600.847	1164.49		165.792	841.307	2184.2
	11.4995	324.841	784.324	2013.66		137.961	597.927	1163.76		159.734	849.862	2213.56
	11.5829	341.23	800.823	1998.94		132.054	554.097	1183.06		183.508	898.118	2095.26
	11.6662	309.13	806.486	1987.24		123.653	539.87	1217.22		197.526	861.158	2054.53
	11.7495	309.379	824.252	2044.34		127.353	515.31	1194.43		193.783	864.583	2054.66
	11.8329	299.992	815.813	2051.34		124.5	537.745	1146.43		189.15	831.266	2092.69
	11.9162	302.172	828.348	2034.88		144.88	478.621	1093.3		183.994	793.378	2092.65
	11.9995	310.189	849.133	2020.88		153.562	477.451	1028.41		177.236	787.657	2104.62
	12.0829	303.571	813.285	2005.82		164.386	485.907	998.613		184.182	839.285	2088.85
	12.1662	312.992	820.03	2024.37		135.813	469.367	1003.24		183.318	813.022	2089.44
	12.2495	319.278	858.048	2056.32		144.27	454.427	976.828		206.588	802.225	2029.03
	12.3328	306.03	827.361	2042.97		143.359	462.016	955.413		184.537	787.915	2086.09
	12.4162	311.982	848.073	2065.2		142.305	450.08	1018.92		177.834	732.574	2115.84
	12.4995	315.142	859.45	2063.79		129.529	456.667	1049.11		154.204	769.329	2136.64
	12.5828	320.524	854.59	1924.35		128.39	502.148	1133.19		159.302	772.228	2161.77
	12.6662	303.676	864.106	2063.79		130.527	526.286	1168.02		166.824	784.967	2113.26
	12.7495	301.011	875.368	2076.66		149.163	520.311	1178.35		174.72	785.96	2044.5
	12.8328	296.326	855.906	2014.41		173.077	521.869	1177.47		172.948	798.702	2030.06
	12.9162	320.699	853.196	1953.68		158.436	534.771	1233.97		178.321	821.517	2061.19
	12.9995	323.911	856.316	1908.9		162.69	544.069	1259.51		173.936	806.89	2131.97
	13.0828	302.951	855.877	1923.92		153.704	511.988	1270.59		189.11	779.803	2042.89
	13.1661	307.803	862.736	1926.63		152.572	556.619	1284.78		192.808	722.981	2042.7
	13.2495	298.085	829.668	1923.49		155.638	573.035	1299.88		186.648	735.279	2052.17
	13.3328	307.69	830.538	1905.18		154.149	553.855	1248.63		189.863	740.343	2028.41
	13.4161	298.904	859.124	1900.54		148.849	538.77	1166.02		155.568	718.799	2001.82
	13.4995	301.309	864.367	1907.3		149.556	518.039	1066.94		165.041	716.634	1960.42
	13.5828	296.141	869.896	1914.53		132.825	506.069	1086.95		170.08	713.333	2006.25
	13.6661	316.507	833.284	1856.01		127.207	481.447	1191.9		161.971	712.87	2068.37
	13.7494	310.206	854.435	1870.6		144.709	493.152	1255.72		145.355	730.884	2049.28
	13.8328	296.656	838.678	1855.48		155.307	491.193	1283.25		148.459	708.663	2019.34
	13.9161	287.679	815.043	1888.36		162.23	488.541	1311.41		143.722	700.622	1962.09
	13.9994	284.389	818.923	1906.27		160.874	492.283	1278.38		137.878	704.772	1958.87
	14.0828	298.19	802.499	1997.73		149.708	502.045	1202.84		133.14	708.224	2005.59
	14.1661	298.979	811.609	2069.74		144.924	514.132	1156.14		135.988	725.452	2065.21
	14.2494	295.408	779.075	2058.58		148.024	549.43	1121.36		134.485	737.169	2080.24
	14.3328	284.162	765.291	2036.36		142.316	542.221	1122.03		145.834	754.689	2084.95
	14.4161	280.668	789.754	1999.81		125.433	528.904	1092.01		130.271	758.012	2084.69
	14.4994	280.587	782.737	2012.3		124.472	529.535	1085.24		130.231	743.478	2048.95
	14.5828	285.064	770.177	2035.85		145.465	524.758	1086.46		131.311	700.498	2026.13
	14.6661	290.073	787.306	2019.05		138.47	515.946	1110.45		143.534	708.915	2034.47
	14.7494	298.482	796.845	1956.38		136.667	506.274	1105.45		149.11	694.95	2069.72
	14.8327	301.462	792.565	2042.92		126.525	497.447	1110.54		159.775	689.664	2069.88
	14.9161	285.204	777.122	2005.99		127.04	499.367	1136.77		151.043	707.904	2067.36
	14.9994	304.833	773.954	2046.29		128.684	531.534	1127.22		146.174	724.479	2121.41
	15.0827	293.606	791.566	2072.48		124.929	526.18	1114.72		149.583	718.415	2132.51
	15.1661	293.54	784.548	2047.37		127.769	484.628	1144.25		144.246	697.122	2086.83
	15.2494	296.069	795.022	2067.93		124.806	447.084	1135.49		143.38	694.77	2095.46
	15.3327	310.982	811.655	1944.35		121.767	423.637	1091.98		144.158	707.572	2080.05
	15.4161	290.807	815.287	1989.19		118.512	414.857	1070.69		134.652	713.069	2130.23
	15.4994	294.978	805.945	1941.54		105.595	416.364	1043.86		125.384	732.443	2159.41
	15.5827	300.949	824.325	2019.01		125.212	418.16	1044.11		141.755	727.479	2152.25
	15.666	295.345	833.853	1990.46		146.419	418.928	1063.84		130.994	719.427	2221.12
	15.7494	309.578	859.168	2016.34		144.108	428.776	1100.4		140.717	695.097	2243.75
	15.8327	307.065	842.81	2053.97		164.468	412.232	1130.45		126.489	713.033	2299.95
	15.916	300.342	829.976	2091.15		179.064	415.568	1091.5		136.703	716.358	2310.03
	15.9994	302.313	842.796	2097.43		181.132	442.83	1087.23		140.103	735.255	2266.71
	16.0827	301.158	876.942	2107.07		182.685	439.399	1116.07		151.823	790.959	2334.73
	16.166	297.789	895.581	2109.8		178.438	431.98	1116.66		155.426	775.42	2279.29
	16.2493	307.632	884.317	2121.83		165.493	429.45	1073.46		152.337	792.508	2277.61
	16.3327	305.585	893.844	2105.27		136.507	411.95	1139.5		152.554	773.516	2298.52
	16.416	318.741	885.215	2133.55		125.788	418.616	1152.65		155.987	776.37	2244.43
	16.4993	314.965	887.748	2161.68		123.282	415.622	1143.04		157.331	761.379	2245.86
	16.5827	306.147	879.938	2158.96		119.769	412.644	1195.43		156.967	738.378	2229.43
	16.666	297.373	901.738	2160.96		116.794	426.711	1194.63		162.346	728.047	2257.15
	16.7493	315.063	882.946	2142.53		108.176	393.331	1144.21		159.409	758.223	2234.65
	16.8327	312.103	899.974	2149.96		111.01	387.25	1117.54		166.83	793.581	2182.79
	16.916	308.468	886.059	2130.78		109.132	396.238	1077.48		152.879	761.947	2148.51
	16.9993	317.362	900.66	2139.34		110.677	426.568	1095.33		140.768	750.524	2138.2
	17.0827	313.991	915.309	2134.47		105.495	463.148	1126.02		138.01	751.143	2118.81
	17.166	305.353	899.662	2148.43		116.721	472.741	1183.11		127.57	720.732	2123.25
	17.2493	302.338	885.62	2149.97		132.761	487.539	1164.54		129.263	725.101	2149.27
	17.3326	292.061	896.933	2109.88		143.744	478.267	1113.42		142.312	747.586	2168.21
	17.416	287.803	885.098	2157.81		151.799	498.864	1034.32		155.943	742.139	2220.04
	17.4993	319.02	888.838	2186.87		156.219	533.296	1003.98		158.674	743.971	2227.58
	17.5826	320.799	879.585	2197.93		164.508	553.794	953.878		149.455	762.962	2265.81
	17.666	309.466	890.06	2194.31		158.006	550.11	938.726		136.769	791.182	2238.13
	17.7493	305.518	901.367	2215.84		151.399	547.614	987.614		148.348	762.273	2240.71
	17.8326	299.251	919.965	2252.92		155.832	550.242	1056.75		131.833	762.317	2264.8
	17.9159	303.525	914.942	2218.85		141.168	524.796	1131.7		124.726	755.658	2256
	17.9993	330.802	905.73	2168.47		131.809	492.911	1142.29		138.527	761.486	2279.21
	18.0826	307.061	909.466	2228.13		119.622	507.262	1112.53		132.555	769.447	2268.16
	18.1659	298.408	910.416	2269.21		115.689	486.302	1089.8		132.629	757.989	2228.96
	18.2493	312.421	878.902	2263.8		110.001	487.685	1091.63		127.546	735.17	2221.66
	18.3326	322.818	870.771	2282.36		113.871	515.679	1105.86		141.536	741.186	2209.23
	18.4159	324.021	885.276	2245.95		114.337	503.643	1176.79		147.699	715.397	2129.71
	18.4993	318.906	876.909	2251.9		111.419	538.5	1186.87		148.365	725.404	2099.57
	18.5826	314.312	866.051	2247.74		105.996	581.522	1257.19		127.549	733.146	2128.96
	18.6659	300.107	850.177	2165.67		106.644	615.474	1318.6		123.208	724.462	2162.89
	18.7492	296.877	851.669	2186.04		106.143	636.706	1328.68		133.852	691.747	2145.36
	18.8326	292.011	841.143	2191.81		112.071	629.34	1266.18		132.244	700.018	2121.69
	18.9159	290.675	803.81	2169.21		116.337	598.413	1293.81		137.513	684.657	2145.26
	18.9992	293.349	761.953	2166.17		97.3934	587.772	1286.49		126.269	668.011	2136.42
	19.0826	289.591	764.688	2118.63		84.633	563.199	1270.16		117.094	613.324	2093.84
	19.1659	283.111	765.731	2019.65		77.2722	505.126	1211.16		101.04	588.396	2044.07
	19.2492	260.64	740.293	1939.01		58.0794	479.616	1140.48		92.2731	579.891	2000.35
	19.3326	241.59	664.331	1895.41		42.3677	454.883	1098.91		92.277	581.024	1934.61
	19.4159	220.22	620.793	1766.52		24.085	387.855	1021.52		92.4072	570.895	1839.21
	19.4992	183.671	530.043	1569.14		15.7566	318.265	875.266		91.1603	537.516	1732.76
	19.5826	150.637	446.043	1345.02		16.2375	275.564	741.16		66.9851	530.369	1623.15
	19.6659	113.716	357.426	1155.89		13.0403	223.933	576.952		40.9489	486.226	1491.91
	19.7492	85.0147	261.056	915.989		12.6984	182.47	462.067		29.4735	396.859	1284.3
	19.8325	77.2966	206.335	739.075		11.3897	141.42	401.727		20.8137	316.778	1061.51
	19.9159	67.2668	175.211	636.796		4.78124	128.028	340.232		25.8614	244.892	885.933
	19.9992	48.8602	161.983	528.687		5.27154	107.008	305.487		32.0818	182.306	730.129
	20.0825	50.3516	145.954	456.336		3.38745	94.1539	266.667		18.6717	152.055	641.993
	20.1659	48.0986	118.421	419.864		10.1112	92.3872	251.231		9.73634	135.928	558.916
	20.2492	46.7238	111.043	372.344		10.2899	92.4861	226.336		17.6763	119.159	501.506
	20.3325	40.8647	112.302	338.88		9.80132	84.7939	210.272		24.0137	105.758	455.082
	20.4158	39.2697	97.2867	311.411		8.61345	69.019	217.971		21.8778	90.0477	389.749
	20.4992	40.9192	86.1787	295.825		6.79949	58.5264	194.54		10.4324	86.8047	354.557
	20.5825	38.8243	85.5923	271.174		7.45105	58.7011	188.862		9.41044	80.2168	323.544
	20.6658	28.9043	81.5342	255.918		4.41614	64.6576	196.91		8.04354	76.936	295.688
	20.7492	27.248	81.3541	235.722		1.56569	64.803	169.674		-1.53486	71.6324	280.345
	20.8325	30.7153	75.0762	217.602		-0.25938	59.8653	147.175		6.62194	70.3712	266.053
	20.9158	28.6983	73.6421	197.582		-2.71163	42.2553	144.325		8.63764	65.7879	261.275
	20.9992	22.3522	59.6493	198.004		-7.90143	49.5384	135.872		2.54184	56.8321	257.846
	21.0825	26.1541	51.7274	174.015		-5.86283	50.7381	129.311		0.43584	46.9402	240.412
	21.1658	22.8479	47.8462	172.837		0.62345	40.7448	106.233		4.74964	47.0157	223.225
	21.2492	21.2669	50.423	155.743		3.36723	35.2585	93.8353		1.93554	47.5044	214.597
	21.3325	19.3043	55.3774	133.273		4.03628	16.7272	108.106		-2.90086	49.258	194.992
	21.4158	14.9101	52.175	135.63		3.70068	24.7952	108.926		0.44864	47.3961	182.828
	21.4991	10.1205	36.9846	140.22		-2.27997	19.1698	101.213		-2.28486	45.4059	173.547
	21.5825	13.1593	40.0234	138.319		-6.39057	14.5877	97.1436		-0.40016	38.1853	167.219
	21.6658	17.4995	41.2488	123.851		-3.60356	12.2096	82.4612		3.32314	49.2544	163.162
	21.7491	18.6751	37.274	110.781		-5.61629	4.27785	81.6939		-1.73846	46.49	150.636
	21.8325	10.0717	34.9662	107.64		-15.082	2.18455	91.676		-7.45076	28.9602	139.986
	21.9158	12.7217	34.4303	98.0197		-17.7176	9.31125	76.103		-4.90676	29.7153	134.384
	21.9991	14.5811	32.5684	93.263		-19.0349	9.54255	68.7759		-9.93976	31.0492	128.776
	22.0825	7.2749	26.1798	84.8516		-20.516	11.7264	67.8753		-10.8001	33.3229	111.325
	22.1658	10.8123	22.9645	81.5601		-22.672	16.3867	67.7362		-12.2529	26.7602	109.025
	22.2491	10.7767	22.2783	78.5003		-21.528	14.1943	59.6529		-12.1268	12.4006	111.62
	22.3324	5.8765	24.6563	83.2709		-24.7353	11.534	53.286		-12.1577	16.6747	100.207
	22.4158	7.3723	21.551	75.2589		-28.7057	4.96725	41.2587		-7.77816	11.0203	92.3232
	22.4991	9.9276	19.325	66.7425		-22.8138	14.0477	36.2964		-12.1294	11.1374	92.9684
	22.5824	2.9788	21.3455	63.5888		-16.5637	8.03245	48.8133		-12.577	8.09805	94.5079
	22.6658	2.6535	20.3898	60.7821		-22.025	-0.83825	43.2269		-5.55046	7.04735	75.4454
	22.7491	0.9384	10.1759	60.5758		-17.0192	-1.03915	44.8215		-8.28296	9.13975	81.5634
	22.8324	0.7338	13.2266	63.3912		-21.4264	-5.50965	34.4999		-3.33006	5.14285	82.811
	22.9157	4.9695	18.8475	53.669		-25.9038	-4.91815	33.5666		-2.01556	0.94815	82.3584
	22.9991	1.5153	18.4178	50.915		-18.9077	-0.11815	35.4723		-7.45716	3.38705	88.4839
	23.0824	6.6504	13.7244	50.8234		-15.462	3.55105	41.1859		-8.91296	5.02065	79.9134
	23.1657	4.9655	14.5625	49.8541		-10.5008	-7.00555	31.4079		-14.1146	2.40805	73.3019
	23.2491	2.1688	6.49842	52.6369		-13.5135	-25.672	17.5174		-21.5222	6.22095	61.588
	23.3324	4.0465	13.6087	37.6796		-21.407	-18.5429	7.95195		-14.7489	10.1274	60.0424
	23.4157	0.2598	16.2393	33.2784		-18.0632	-12.9573	3.94321		-4.55496	7.65695	62.4511
	23.4991	-0.7502	12.2932	36.0522		-11.6418	-14.8427	1.94524		-10.8728	-0.44725	55.0014
	23.5824	-1.1764	13.5628	41.0431		-17.3159	-14.3587	9.00616		-15.0974	3.31735	57.6774
	23.6657	2.6811	11.9499	34.2157		-23.3666	-20.7748	6.44725		-15.2594	-3.05705	44.0336
	23.7491	1.2805	3.91922	24.6254		-23.1758	-23.8367	-3.2317		-16.5979	-3.79915	43.477
	23.8324	-1.2314	-2.95158	32.1657		-23.3988	-22.9586	-11.2591		-21.2183	1.17715	38.9916
	23.9157	-1.3281	-3.80318	31.0986		-26.9983	-36.813	-23.6189		-25.4776	-7.36825	36.0977
	23.999	-0.0996	3.98272	23.345		-31.0816	-31.1414	-12.5873		-16.3241	-8.97865	31.2265
	24.0824	-1.226	6.09162	23.4325		-32.498	-25.5373	-1.12798		-11.3562	-12.0587	26.8491
	24.1657	0.8356	0.61722	23.5024		-32.7266	-25.1968	-8.43377		-9.04996	-14.8399	34.598
	24.249	3.48	3.26832	21.784		-28.7328	-30.2318	-14.8629		-14.6866	-13.6985	34.1785
	24.3324	0.4493	1.05902	20.4427		-25.9691	-34.175	-11.9342		-14.0425	-12.7986	23.6085
	24.4157	-2.2101	-2.13848	17.2975		-27.2823	-36.0551	-13.2863		-10.3918	-14.5883	22.319
	24.499	0.155	1.15262	16.0101		-28.8943	-29.9727	-14.2593		-10.2787	-11.0373	21.6261
	24.5824	1.6971	-0.52718	20.0544		-25.0231	-20.2032	-9.43476		-12.5914	-9.76945	18.6682
	24.6657	-4.5957	1.30672	20.6435		-25.4579	-15.9741	-20.2934		-11.468	-16.5725	22.8957
	24.749	-2.063	1.25332	13.7971		-27.3507	-19.2213	-29.8721		-23.0638	-24.7539	17.1857

## Sheet: Figure 1 - Figure Supplement 1C
	Figure 1 - Figure Supplement 1C
	time[s]	Actin fluorescence [au]	CP fluorescence[au]	Arp2/3 fluorescence[au]
	0	44.905	41.701	16.519
	5	134.876	108.535	64.6227
	10	238.312	222.834	120.892
	15	266.118	300.318	133.025
	20	259.479	306.237	154.333
	25	252.953	287.581	159.311
	30	243.387	277.312	143.141
	35	240.793	293.562	165.992
	40	223.46	293.973	139.645
	45	227.026	289.283	140.685
	50	218.954	284.874	152.314
	55	214.845	291.129	134.75
	60	224.842	275.787	124.391
	65	215.663	287.25	151.177
	70	222.808	281.524	172.973
	75	211.355	274.202	154.03
	80	210.81	284.601	183.78
	85	216.191	289.668	171.606
	90	219.449	280.236	191.662
	95	228.999	286.357	212.566
	100	216.693	283.248	163.655
	105	219.865	281.803	192.677
	110	222.258	277.63	208.917
	115	227.503	283.605	205.197
	120	218.92	279.203	174.428
	125	213.64	288.842	193.606
	130	213.61	289.022	191.862
	135	226.953	286.907	189.897
	140	210.714	291.108	177.736
	145	231.65	291.727	145.21
	150	218.584	277.369	140.944
	155	199.89	267.509	135.093
	160	211.728	263.686	131.735
	165	210.492	274.802	132.816
	170	194.373	280.216	114.548
	175	206.735	273.428	110.045
	180	205.99	261.042	85.9426
	185	215.259	270.855	113.682
	190	196.808	270.909	114.65
	195	203.508	265.786	123.146
	200	209.487	274.544	140.704
	205	197.193	269.163	122.186
	210	187.336	262.616	148.1
	215	201.957	270.906	104.654
	220	214.88	269.983	120.726
	225	211.981	273.655	150.185
	230	227.528	263.239	131.134
	235	199.652	265.09	107.478
	240	191.415	272.856	175.218
	245	199.338	273.894	168.518
	250	200.067	258.177	134.698
	255	196.174	263.34	125.252
	260	215.083	268.085	97.0838
	265	218.871	263.921	103.153
	270	217.531	272.384	86.2129
	275	206.573	272.676	121.409
	280	214.197	274.991	123.09
	285	211.315	271.128	115.19
	290	205.255	263.189	104.505
	295	220.241	274.411	99.1835
	300	215.479	266.923	106.627
	305	212.791	262.902	129.928
	310	215.13	269.108	117.111
	315	227.479	273.545	137.901
	320	195.853	267.672	115.312
	325	207.758	269.394	151.175
	330	214.234	261.738	135.81
	335	200.73	266.229	154.954
	340	197.356	269.19	138.422
	345	219.285	268.56	127.3
	355	205.563	268.731	135.93
	365	201.209	271.419	127.664
	375	212.2	255.777	127.197
	385	228.434	266.56	136.194
	395	210.159	270.724	98.1684
	405	207.969	274.468	104.959
	415	209.133	263.287	142.252
	425	216.564	269.279	155.633
	435	215.744	275.298	149.638
	445	213.103	268.09	173.435
	455	209.105	263.855	176.73
	465	223.612	279.512	148.1
	475	202.515	255.673	185.63
	485	200.149	250.499	157.696
	495	198.901	253.265	163.67
	505	199.981	252.672	172.536
	515	200.214	260.81	122.292
	525	206.228	255.44	158.855
	535	213.985	255.661	161.332
	545	208.689	266.924	186.382
	555	209.865	258.351	180.571
	565	209.785	256.907	171.928
	575	205.837	260.154	162.194
	585	196.802	254.718	160.026
	595	204.905	272.322	181.821
	605	194.893	260.821	180.249
	615	215.416	252.666	170.34
	625	206.962	267.412	175.748
	635	202.134	268.658	162.338
	645	212.782	251.562	185.802
	655	214.916	264.695	167.8
	665	209.858	266.084	158.377
	675	217.621	264.742	145.421
	685	208.983	262.162	167.877
	695	205.22	255.034	160.132
	705	200.874	263.178	139.464
	715	199.588	260.419	150.699
	725	217.382	264.111	123.685
	735	192.908	252.379	128.635
	745	209.006	253.82	123.651
	755	204.037	257.913	116.613
	765	192.555	259.522	101.374
	775	213.883	265.931	127.055
	785	196.441	256.995	141.862
	795	214.381	250.168	125.851
	805	189.093	261.761	132.749
	815	208.953	266.038	132.77
	825	201.94	267.015	128.594
	835	210.982	273.258	115.321
	845	208.1	252.692	108.281
	855	207.464	263.053	131.926
	865	199.878	269.276	135.68
	875	241.29	270.952	131.448
	885	211.3	268.256	97.4223
	895	214.754	259.472	82.5577
	915	218.084	261.207	114.205
	935	213.498	277.681	164.725
	955	215.641	266.957	156.919
	975	223.159	265.658	122.855
	995	218.031	260.62	156.216
	1015	216.17	255.28	169.592
	1035	222.224	269.734	164.517
	1055	214.809	269.031	194.525
	1075	222.643	279.812	138.893
	1095	212.259	266.717	165.093
	1115	230.881	260.194	163.443
	1135	221.653	271.287	107.954
	1155	225.831	263.082	196.464
	1175	216.859	271.975	146.983
	1195	236.953	263.912	154.614
	1215	212.578	271.443	116.906
	1235	226.012	266.437	88.4562
	1255	204.715	260.871	129.956
	1275	205.089	262.818	135.292
	1295	228.098	278.26	89.3817
	1315	208.327	278.8	155.783
	1335	202.614	273.849	150.489
	1355	214.961	273.982	157.512
	1375	213.548	275.751	133.359
	1395	213.775	276.454	124.883
	1415	197.307	267.484	131.581
	1435	197.615	263.154	128.075
	1455	198.689	268.904	149.28
	1475	212.169	265.296	140.898
	1495	209.362	263.82	144.675
	1515	199.252	263.856	135.086
	1535	213.543	267.006	121.358
	1555	207.733	281.713	138.297
	1575	209.082	263.263	149.608
	1595	204.223	282.76	166.244
	1615	214.741	293.198	153.182
	1635	218.418	285.844	171.718
	1655	216.816	269.523	149.694
	1675	--	270.714	148.217
	--	--	--	--
	--	--	--	--
	--	--	--	--
	--	--	--	--
	--	--	--	--
	--	--	--	--
	--	--	--	--
	--	--	--	--
	--	--	--	--
	--	--	--	--
	--	--	--	--
	--	--	--	--
	--	--	--	--
	--	--	--	--
	--	--	--	--
	--	--	--	--
	--	--	--	--
	--	--	--	--
	--	--	--	--
	--	--	--	--
	--	--	--	--
	--	--	--	--
	--	--	--	--
	--	--	--	--
	--	--	--	--
	--	--	--	--
	--	--	--	--
	--	--	--	--
	--	--	--	--
	--	--	--	--
	--	--	--	--
	--	--	--	--
	--	--	--	--
	--	--	--	--
	--	--	--	--
	--	--	--	--
	--	--	--	--
	--	--	--	--
	--	--	--	--
	--	--	--	--
	--	--	--	--
	--	--	--	--
	--	--	--	--
	--	--	--	--
	--	--	--	--
	--	--	--	--
	--	--	--	--
	--	--	--	--
	--	--	--	--
	--	--	--	--
	--	--	--	--
	--	--	--	--
	--	--	--	--
	--	--	--	--
	--	--	--	--
	--	--	--	--
	--	--	--	--
	--	--	--	--
	--	--	--	--
	--	--	--	--
	--	--	--	--
	--	--	--	--
	--	--	--	--
	--	--	--	--
	--	--	--	--
	--	--	--	--
	--	--	--	--
	--	--	--	--
	--	--	--	--
	--	--	--	--
	--	--	--	--
	--	--	--	--
	--	--	--	--
	--	--	--	--
	--	--	--	--
	--	--	--	--
	--	--	--	--
	--	--	--	--
	--	--	--	--
	--	--	--	--
	--	--	--	--
	--	--	--	--
	--	--	--	--
	--	--	--	--
	--	--	--	--
	--	--	--	--
	--	--	--	--
	--	--	--	--
	--	--	--	--
	--	--	--	--
	--	--	--	--
	--	--	--	--
	--	--	--	--
	--	--	--	--
	--	--	--	--
	--	--	--	--
	--	--	--	--
	--	--	--	--
	--	--	--	--
	--	--	--	--
	--	--	--	--
	--	--	--	--
	--	--	--	--
	--		--	--
