# Supplementary material for: The molecular mechanism of load adaptation by branched actin networks
Source: eLife. 2022 Jun 24;11:e73145. doi: 10.7554/eLife.73145 (PMC9328761; doi:10.7554/eLife.73145)
Supplement: Figure 1—source data 1. [file elife-73145-fig1-data1.xlsx]

## Sheet: Figure 1C
	Figure 1C (top panel)					Figure 1C (bottom panel 1)					Figure 1C (bottom panel 2)					Figure 1C (bottom panel 3)
	Quantification of network height and growth stress as a function of time					Quantification of Actin fluorescence as a function of time					Quantification of CP fluorescence as a function of time					Quantification of CP fluorescence as a function of time
							loaded network	unloaded control network				loaded network	unloaded control network				loaded network	unloaded control network
	time [s]	growth stress [Pa]	network height [um]			time [s]	actin fluorescence [au]	actin fluorescence [au]			time [s]	CP fluorescence [au]	CP fluorescence [au]			time [s]	Arp2/3 fluorescence [au]	Arp2/3 fluorescence [au]
	0	--	--			0	32.54	44.905			0	72.234	41.701			0	39.555	16.519
	0.036	--	--			5	71.709	134.876			5	124.272	108.535			5	47.084	64.6227
	0.052	--	--			10	150.361	238.312			10	189.328	222.834			10	126.48	120.892
	0.061	--	--			15	192.272	266.118			15	282.401	300.318			15	142.452	133.025
	0.089	--	--			20	211.421	259.479			20	329.919	306.237			20	167.565	154.333
	0.115	--	--			25	219.934	252.953			25	370.693	287.581			25	149.348	159.311
	0.148	--	--			30	206.038	243.387			30	380.448	277.312			30	138.481	143.141
	0.165	--	--			35	262.128	240.793			35	457.832	293.562			35	183.642	165.992
	0.187	--	--			40	332.315	223.46			40	482.013	293.973			40	215.347	139.645
	0.227	--	--			45	327.045	227.026			45	484.61	289.283			45	189.54	140.685
	0.258	--	--			50	337.092	218.954			50	502.829	284.874			50	206.633	152.314
	0.299	--	--			55	330.59	214.845			55	490.403	291.129			55	219.562	134.75
	0.325	--	--			60	366.983	224.842			60	486.481	275.787			60	206.262	124.391
	0.352	--	--			65	358.944	215.663			65	517.574	287.25			65	257.657	151.177
	0.378	--	--			70	383.932	222.808			70	505.415	281.524			70	274.078	172.973
	0.407	--	--			75	364.903	211.355			75	500.611	274.202			75	223.338	154.03
	0.44	--	--			80	369.639	210.81			80	516.305	284.601			80	257.363	183.78
	0.466	--	--			85	368.48	216.191			85	516.413	289.668			85	275.544	171.606
	0.515	--	--			90	379.528	219.449			90	509.651	280.236			90	280.403	191.662
	0.541	--	--			95	386.961	228.999			95	517.388	286.357			95	228.484	212.566
	0.578	--	--			100	366.55	216.693			100	488.624	283.248			100	246.394	163.655
	0.619	--	--			105	386.674	219.865			105	521.845	281.803			105	268.685	192.677
	0.645	--	--			110	412.179	222.258			110	522.325	277.63			110	249.192	208.917
	0.665	--	--			115	399.401	227.503			115	532.279	283.605			115	253.757	205.197
	0.675	--	--			120	392.414	218.92			120	533.511	279.203			120	309.812	174.428
	0.695	--	--			125	385.583	213.64			125	517.754	288.842			125	275.214	193.606
	0.723	--	--			130	394.648	213.61			130	520.892	289.022			130	266.581	191.862
	0.744	--	--			135	409.101	226.953			135	523.21	286.907			135	320.247	189.897
	0.792	--	--			140	379.923	210.714			140	513.857	291.108			140	255.776	177.736
	0.809	--	--			145	385.827	231.65			145	522.042	291.727			145	269.674	145.21
	0.85	--	--			150	392.837	218.584			150	504.21	277.369			150	309.775	140.944
	0.878	--	--			155	368.955	199.89			155	485.789	267.509			155	251.703	135.093
	0.913	--	--			160	312.233	211.728			160	451.702	263.686			160	266.222	131.735
	0.935	--	--			165	388.217	210.492			165	525.72	274.802			165	330.466	132.816
	0.952	--	--			170	464.865	194.373			170	582.341	280.216			170	326.569	114.548
	0.982	--	--			175	471.531	206.735			175	594.351	273.428			175	363.458	110.045
	1.014	--	--			180	461.62	205.99			180	567.398	261.042			180	348.571	85.9426
	1.033	--	--			185	483.074	215.259			185	590.03	270.855			185	347.383	113.682
	1.073	--	--			190	455.655	196.808			190	574.987	270.909			190	321.686	114.65
	1.09	--	--			195	603.324	203.508			195	660.035	265.786			195	402.121	123.146
	1.132	--	--			200	650.166	209.487			200	719.868	274.544			200	383.103	140.704
	1.151	--	--			205	664.294	197.193			205	712.099	269.163			205	382.892	122.186
	1.176	--	--			210	679.107	187.336			210	742.551	262.616			210	406.595	148.1
	1.197	--	--			215	688.856	201.957			215	755.925	270.906			215	409.922	104.654
	1.224	--	--			220	729.423	214.88			220	747.557	269.983			220	419.128	120.726
	1.255	--	--			225	720.405	211.981			225	779.876	273.655			225	393.208	150.185
	1.282	--	--			230	735.999	227.528			230	726.759	263.239			230	373.164	131.134
	1.308	--	--			235	689.073	199.652			235	763.328	265.09			235	414.092	107.478
	1.357	--	--			240	687.511	191.415			240	749.162	272.856			240	435.43	175.218
	1.39	--	--			245	693.155	199.338			245	762.042	273.894			245	440.588	168.518
	1.415	--	--			250	711.263	200.067			250	745.742	258.177			250	405.66	134.698
	1.438	--	--			255	691.986	196.174			255	734.862	263.34			255	437.108	125.252
	1.459	--	--			260	715.809	215.083			260	785.438	268.085			260	456.637	97.0838
	1.481	--	--			265	1231.57	218.871			265	1170.03	263.921			265	726.476	103.153
	1.504	--	--			270	1289.54	217.531			270	1268.65	272.384			270	723.378	86.2129
	1.532	--	--			275	1303.56	206.573			275	1298.49	272.676			275	685.557	121.409
	1.564	--	--			280	1383.26	214.197			280	1321.77	274.991			280	682.253	123.09
	1.591	--	--			285	1342.54	211.315			285	1324.15	271.128			285	672.725	115.19
	1.638	--	--			290	1390.75	205.255			290	1333.36	263.189			290	714.613	104.505
	1.674	--	--			295	1442.57	220.241			295	1329.91	274.411			295	714.372	99.1835
	1.702	--	--			300	1419.04	215.479			300	1374.05	266.923			300	710.198	106.627
	1.724	--	--			305	1453.27	212.791			305	1343.31	262.902			305	715.438	129.928
	1.747	--	--			310	1431.62	215.13			310	1367.4	269.108			310	728.951	117.111
	1.774	--	--			315	1477.25	227.479			315	1383.73	273.545			315	711.656	137.901
	1.798	--	--			320	1428.05	195.853			320	1358.76	267.672			320	700.173	115.312
	1.826	--	--			325	1464.83	207.758			325	1377.13	269.394			325	740.282	151.175
	1.858	--	--			330	1469.78	214.234			330	1364.2	261.738			330	724.622	135.81
	1.907	--	--			335	1451.7	200.73			335	1392.74	266.229			335	752.974	154.954
	1.934	--	--			340	1411.05	197.356			340	1415.63	269.19			340	735.242	138.422
	1.973	--	--			345	1473.29	219.285			345	1385.35	268.56			345	749.906	127.3
	2.001	--	--			355	1468.88	205.563			355	1387.13	268.731			355	743.481	135.93
	2.024	--	--			365	1450.51	201.209			365	1383.24	271.419			365	737.303	127.664
	2.059	--	--			375	1496.68	212.2			375	1378.73	255.777			375	779.022	127.197
	2.085	--	--			385	1505.34	228.434			385	1392.76	266.56			385	815.475	136.194
	2.114	--	--			395	1451.16	210.159			395	1427.95	270.724			395	792.835	98.1684
	2.14	--	--			405	1510.13	207.969			405	1416.7	274.468			405	790.561	104.959
	2.173	--	--			415	1501	209.133			415	1426.37	263.287			415	801.24	142.252
	2.222	--	--			425	1489.58	216.564			425	1452.28	269.279			425	865.535	155.633
	2.245	--	--			435	1488.2	215.744			435	1444.48	275.298			435	894.451	149.638
	2.275	--	--			445	1428.59	213.103			445	1341.95	268.09			445	797.104	173.435
	2.304	--	--			455	1499.95	209.105			455	1385.45	263.855			455	836.371	176.73
	2.325	--	--			465	1518.46	223.612			465	1477.11	279.512			465	882.947	148.1
	2.345	--	--			475	1456.51	202.515			475	1375.45	255.673			475	783.753	185.63
	2.383	--	--			485	1456.84	200.149			485	1389.15	250.499			485	796.174	157.696
	2.411	--	--			495	1472.16	198.901			495	1397.02	253.265			495	844.299	163.67
	2.429	--	--			505	1441.25	199.981			505	1410.9	252.672			505	835.211	172.536
	2.467	--	--			515	1444.09	200.214			515	1396.5	260.81			515	836.756	122.292
	2.518	--	--			525	2276.33	206.228			525	1963.28	255.44			525	1286.38	158.855
	2.551	--	--			535	2333.84	213.985			535	2118.96	255.661			535	1286.55	161.332
	2.578	--	--			545	2328.86	208.689			545	2168.18	266.924			545	1252.69	186.382
	2.601	--	--			555	2349.78	209.865			555	2178.34	258.351			555	1232.57	180.571
	2.627	--	--			565	2372.74	209.785			565	2162.29	256.907			565	1224.14	171.928
	2.652	--	--			575	2400.25	205.837			575	2225.27	260.154			575	1276.71	162.194
	2.693	--	--			585	2369.68	196.802			585	2180.12	254.718			585	1296.23	160.026
	2.741	--	--			595	2410.73	204.905			595	2289.47	272.322			595	1285.96	181.821
	2.767	--	--			605	2396.18	194.893			605	2170.92	260.821			605	1329.78	180.249
	2.799	--	--			615	2464.31	215.416			615	2210.95	252.666			615	1342.31	170.34
	2.844	--	--			625	2446.02	206.962			625	2208.52	267.412			625	1329.23	175.748
	2.877	--	--			635	2414.41	202.134			635	2252.53	268.658			635	1381.76	162.338
	2.899	--	--			645	2426.39	212.782			645	2184.18	251.562			645	1348.32	185.802
	2.927	--	--			655	2448.78	214.916			655	2243.83	264.695			655	1346.34	167.8
	2.952	--	--			665	2449.45	209.858			665	2311.77	266.084			665	1358.48	158.377
	2.975	--	--			675	2480.49	217.621			675	2259.56	264.742			675	1364.72	145.421
	3.004	--	--			685	2447.33	208.983			685	2280.51	262.162			685	1267.33	167.877
	3.032	--	--			695	2431.59	205.22			695	2214.93	255.034			695	1314.52	160.132
	3.059	--	--			705	2439.9	200.874			705	2280.24	263.178			705	1312.59	139.464
	3.095	--	--			715	2403.34	199.588			715	2248.18	260.419			715	1361.82	150.699
	3.144	--	--			725	2433.28	217.382			725	2289.34	264.111			725	1266.92	123.685
	3.175	--	--			735	2390.94	192.908			735	2179.3	252.379			735	1217.11	128.635
	3.201	--	--			745	2429.22	209.006			745	2190.16	253.82			745	1273.68	123.651
	3.229	--	--			755	2406.67	204.037			755	2225.16	257.913			755	1251.33	116.613
	3.256	--	--			765	2365.7	192.555			765	2251.87	259.522			765	1271.21	101.374
	3.282	--	--			775	2443.2	213.883			775	2286.54	265.931			775	1337.49	127.055
	3.32	--	--			785	2428.33	196.441			785	2273.93	256.995			785	1248.71	141.862
	3.342	--	--			795	2496.5	214.381			795	2162.05	250.168			795	1303.38	125.851
	3.365	--	--			805	2407.14	189.093			805	2282.51	261.761			805	1325.21	132.749
	3.414	--	--			815	3143.39	208.953			815	2795.67	266.038			815	1732.53	132.77
	3.436	--	--			825	3171.69	201.94			825	2864.46	267.015			825	1779.65	128.594
	3.471	--	--			835	3152.26	210.982			835	2898.27	273.258			835	1708.61	115.321
	3.49	--	--			845	3206.16	208.1			845	2865.49	252.692			845	1716.85	108.281
	3.516	--	--			855	3215.05	207.464			855	2892.3	263.053			855	1712.38	131.926
	3.542	--	--			865	3196.98	199.878			865	2945.02	269.276			865	1689.59	135.68
	3.569	--	--			875	3270.42	241.29			875	2904.07	270.952			875	1632.75	131.448
	3.611	--	--			885	3237.61	211.3			885	3003.91	268.256			885	1661.66	97.4223
	3.638	--	--			895	3262.83	214.754			895	3040.98	259.472			895	1741.24	82.5577
	3.654	--	--			915	3300.95	218.084			915	3025.73	261.207			915	1685.77	114.205
	3.695	--	--			935	3269.46	213.498			935	3019.31	277.681			935	1766.49	164.725
	3.729	--	--			955	3282.11	215.641			955	3011.85	266.957			955	1782.15	156.919
	3.756	--	--			975	3289.51	223.159			975	2992.05	265.658			975	1804.96	122.855
	3.784	--	--			995	3326.07	218.031			995	2977.14	260.62			995	1879.52	156.216
	3.806	--	--			1015	3318.18	216.17			1015	2972.98	255.28			1015	1867.97	169.592
	3.832	--	--			1035	3325.18	222.224			1035	3019.6	269.734			1035	1892.33	164.517
	3.859	--	--			1055	3274.56	214.809			1055	3033.4	269.031			1055	1895.29	194.525
	3.889	--	--			1075	3411.43	222.643			1075	3084.94	279.812			1075	1881.29	138.893
	3.921	--	--			1095	3349.9	212.259			1095	3119.03	266.717			1095	1922.01	165.093
	3.948	--	--			1115	3403.8	230.881			1115	3010.66	260.194			1115	1977.02	163.443
	3.99	--	--			1135	3381.98	221.653			1135	3096.23	271.287			1135	1894.67	107.954
	4.025	--	--			1155	3412.26	225.831			1155	3030.23	263.082			1155	1986.8	196.464
	4.052	--	--			1175	3365.4	216.859			1175	3242.82	271.975			1175	1894.92	146.983
	4.075	--	--			1195	3431.39	236.953			1195	3097.82	263.912			1195	1948.22	154.614
	4.096	--	--			1215	3326.7	212.578			1215	3064.91	271.443			1215	1929.27	116.906
	4.121	--	--			1235	3932.13	226.012			1235	3436.32	266.437			1235	2163.05	88.4562
	4.144	--	--			1255	3952.47	204.715			1255	3584.03	260.871			1255	2170.8	129.956
	4.17	--	--			1275	4023.59	205.089			1275	3610.38	262.818			1275	2238.61	135.292
	4.211	--	--			1295	4065.26	228.098			1295	3726.57	278.26			1295	2336.79	89.3817
	4.239	--	--			1315	4037.92	208.327			1315	3749.8	278.8			1315	2336.24	155.783
	4.287	--	--			1335	4035.45	202.614			1335	3768.95	273.849			1335	2330.05	150.489
	4.323	--	--			1355	4118.29	214.961			1355	3769.04	273.982			1355	2344.29	157.512
	4.364	--	--			1375	4032.39	213.548			1375	3794.51	275.751			1375	2290.6	133.359
	4.392	--	--			1395	4039.93	213.775			1395	3809.38	276.454			1395	2294.86	124.883
	4.418	--	--			1415	4309.84	197.307			1415	3980.63	267.484			1415	2438.67	131.581
	4.439	--	--			1435	4511.44	197.615			1435	4144.07	263.154			1435	2525	128.075
	4.46	--	--			1455	4565.44	198.689			1455	4269.17	268.904			1455	2558.12	149.28
	4.489	--	--			1475	4607.23	212.169			1475	4246.42	265.296			1475	2570.4	140.898
	4.527	--	--			1495	4654.38	209.362			1495	4315.06	263.82			1495	2668.13	144.675
	4.55	--	--			1515	4602.94	199.252			1515	4371.09	263.856			1515	2604.87	135.086
	4.589	--	--			1535	4638.04	213.543			1535	4443.23	267.006			1535	2601.86	121.358
	4.63	--	--			1555	4609.81	207.733			1555	4383.62	281.713			1555	2689.49	138.297
	4.652	--	--			1575	4691.04	209.082			1575	4399.01	263.263			1575	2714.93	149.608
	4.678	--	--			1595	4672.79	204.223			1595	4386.87	282.76			1595	2669.94	166.244
	4.702	--	--			1615	4675.21	214.741			1615	4578.62	293.198			1615	2682.87	153.182
	4.724	--	--			1635	4674.88	218.418			1635	4644.38	285.844			1635	2776.93	171.718
	4.749	--	--			1655	4719.38	216.816			1655	4531.78	269.523			1655	2680.93	149.694
	4.769	--	--			--	--	--			1675	4458.15	270.714			1675	2709.43	148.217
	4.798	--	--			--	--	--			--	--	--			--	--	--
	4.846	--	--			--	--	--			--	--	--			--	--	--
	4.881	--	--			--	--	--			--	--	--			--	--	--
	4.915	--	--			--	--	--			--	--	--			--	--	--
	4.942	--	--			--	--	--			--	--	--			--	--	--
	4.97	--	--			--	--	--			--	--	--			--	--	--
	4.996	--	--			--	--	--			--	--	--			--	--	--
	5.022	--	--			--	--	--			--	--	--			--	--	--
	5.052	--	--			--	--	--			--	--	--			--	--	--
	5.08	--	--			--	--	--			--	--	--			--	--	--
	5.115	--	--			--	--	--			--	--	--			--	--	--
	5.157	--	--			--	--	--			--	--	--			--	--	--
	5.196	--	--			--	--	--			--	--	--			--	--	--
	5.223	--	--			--	--	--			--	--	--			--	--	--
	5.251	--	--			--	--	--			--	--	--			--	--	--
	5.277	--	--			--	--	--			--	--	--			--	--	--
	5.305	--	--			--	--	--			--	--	--			--	--	--
	5.331	--	--			--	--	--			--	--	--			--	--	--
	5.36	--	--			--	--	--			--	--	--			--	--	--
	5.387	--	--			--	--	--			--	--	--			--	--	--
	5.409	--	--			--	--	--			--	--	--			--	--	--
	5.448	--	--			--	--	--			--	--	--			--	--	--
	5.485	--	--			--	--	--			--	--	--			--	--	--
	5.543	--	--			--	--	--			--	--	--			--	--	--
	5.552	--	--			--	--	--			--	--	--			--	--	--
	5.573	--	--			--	--	--			--	--	--			--	--	--
	5.598	--	--			--	--	--			--	--	--			--	--	--
	5.624	--	--			--	--	--			--	--	--			--	--	--
	5.656	--	--			--	--	--			--	--	--			--	--	--
	5.683	--	--			--	--	--			--	--	--			--	--	--
	5.708	--	--			--	--	--			--	--	--			--	--	--
	5.761	--	--			--	--	--			--	--	--			--	--	--
	5.79	--	--			--	--	--			--	--	--			--	--	--
	5.812	--	--			--	--	--			--	--	--			--	--	--
	5.831	--	--			--	--	--			--	--	--			--	--	--
	5.854	--	--			--	--	--			--	--	--			--	--	--
	5.88	--	--			--	--	--			--	--	--			--	--	--
	5.907	--	--			--	--	--			--	--	--			--	--	--
	5.934	--	--			--	--	--			--	--	--			--	--	--
	5.96	--	--			--	--	--			--	--	--			--	--	--
	5.986	--	--			--	--	--			--	--	--			--	--	--
	6.044	--	--			--	--	--			--	--	--			--	--	--
	6.073	--	--			--	--	--			--	--	--			--	--	--
	6.099	--	--			--	--	--			--	--	--			--	--	--
	6.123	--	--			--	--	--			--	--	--			--	--	--
	6.14	--	--			--	--	--			--	--	--			--	--	--
	6.157	--	--			--	--	--			--	--	--			--	--	--
	6.185	--	--			--	--	--			--	--	--			--	--	--
	6.21	--	--			--	--	--			--	--	--			--	--	--
	6.22	--	--			--	--	--			--	--	--			--	--	--
	6.274	--	--			--	--	--			--	--	--			--	--	--
	6.314	-3.65633	--			--	--	--			--	--	--			--	--	--
	6.346	-3.39974	--			--	--	--			--	--	--			--	--	--
	6.356	-3.46389	--			--	--	--			--	--	--			--	--	--
	6.389	-3.91291	--			--	--	--			--	--	--			--	--	--
	6.417	-4.42608	--			--	--	--			--	--	--			--	--	--
	6.426	-4.29779	--			--	--	--			--	--	--			--	--	--
	6.451	-4.74681	--			--	--	--			--	--	--			--	--	--
	6.473	-4.61852	--			--	--	--			--	--	--			--	--	--
	6.499	-5.58071	--			--	--	--			--	--	--			--	--	--
	6.555	-5.06754	--			--	--	--			--	--	--			--	--	--
	6.596	-5.8373	--			--	--	--			--	--	--			--	--	--
	6.626	-6.79949	--			--	--	--			--	--	--			--	--	--
	6.653	-6.41459	--			--	--	--			--	--	--			--	--	--
	6.68	-5.96556	--			--	--	--			--	--	--			--	--	--
	6.703	-5.77316	--			--	--	--			--	--	--			--	--	--
	6.736	-5.77316	--			--	--	--			--	--	--			--	--	--
	6.765	-5.8373	--			--	--	--			--	--	--			--	--	--
	6.792	-5.58071	--			--	--	--			--	--	--			--	--	--
	6.823	-6.22219	--			--	--	--			--	--	--			--	--	--
	6.873	-6.35046	--			--	--	--			--	--	--			--	--	--
	6.896	-6.67117	--			--	--	--			--	--	--			--	--	--
	6.931	-5.70898	--			--	--	--			--	--	--			--	--	--
	6.958	-6.41459	--			--	--	--			--	--	--			--	--	--
	6.985	-6.73536	--			--	--	--			--	--	--			--	--	--
	7.008	-6.92776	--			--	--	--			--	--	--			--	--	--
	7.034	-5.96556	--			--	--	--			--	--	--			--	--	--
	7.064	-5.58071	--			--	--	--			--	--	--			--	--	--
	7.093	-5.70898	--			--	--	--			--	--	--			--	--	--
	7.129	-5.96556	--			--	--	--			--	--	--			--	--	--
	7.179	-5.4524	--			--	--	--			--	--	--			--	--	--
	7.206	-5.58071	--			--	--	--			--	--	--			--	--	--
	7.252	-4.74681	--			--	--	--			--	--	--			--	--	--
	7.278	-5.38827	--			--	--	--			--	--	--			--	--	--
	7.306	-5.32413	--			--	--	--			--	--	--			--	--	--
	7.332	-4.81095	--			--	--	--			--	--	--			--	--	--
	7.358	-5.32413	--			--	--	--			--	--	--			--	--	--
	7.38	-4.36193	--			--	--	--			--	--	--			--	--	--
	7.411	-4.42608	--			--	--	--			--	--	--			--	--	--
	7.432	-4.93925	--			--	--	--			--	--	--			--	--	--
	7.464	-3.65633	--			--	--	--			--	--	--			--	--	--
	7.482	-4.10535	--			--	--	--			--	--	--			--	--	--
	7.492	-4.16949	--			--	--	--			--	--	--			--	--	--
	7.527	-4.23364	--			--	--	--			--	--	--			--	--	--
	7.549	-3.84877	--			--	--	--			--	--	--			--	--	--
	7.572	-4.10535	--			--	--	--			--	--	--			--	--	--
	7.595	-4.93925	--			--	--	--			--	--	--			--	--	--
	7.621	-3.52804	--			--	--	--			--	--	--			--	--	--
	7.652	-4.0412	--			--	--	--			--	--	--			--	--	--
	7.696	-3.91291	--			--	--	--			--	--	--			--	--	--
	7.723	-3.72047	--			--	--	--			--	--	--			--	--	--
	7.746	-3.65633	--			--	--	--			--	--	--			--	--	--
	7.795	-3.65633	--			--	--	--			--	--	--			--	--	--
	7.822	-3.14316	--								--	--	--			--	--	--
	7.85	-3.59218	--
	7.873	-3.52804	--
	7.899	-3.78462	--
	7.928	-3.27145	--
	7.945	-3.39974	--
	7.955	-3.65633	--
	7.995	-2.75828	--
	8.011	-1.41121	--
	8.05	-3.52804	--
	8.075	-4.10535	--
	8.084	-3.27145	--
	8.106	-2.69414	--
	8.135	-3.97706	--
	8.163	-2.82243	--
	8.185	-3.65633	--
	8.223	-3.39974	--
	8.245	-3.07901	--
	8.267	-3.14316	--
	8.294	-3.20731	--
	8.334	-2.95072	--
	8.357	-2.5017	--
	8.375	-3.27145	--
	8.412	-3.27145	--
	8.44	-2.69414	--
	8.462	-2.30926	--
	8.506	-3.07901	--
	8.533	-2.3734	--
	8.56	-1.79609	--
	8.589	-1.6678	--
	8.624	-2.24511	--
	8.653	-2.30926	--
	8.675	-1.73194	--
	8.719	-1.60365	--
	8.74	-0.577316	--
	8.765	-1.34707	--
	8.805	-2.24511	--
	8.832	-3.39974	--
	8.858	-2.88657	--
	8.891	-2.75828	--
	8.921	-3.14316	--
	8.95	-2.43755	--
	8.983	-0.513168	--
	9.004	0.384877	--
	9.022	0.128292	--
	9.07	-2.18096	--
	9.092	-1.60365	--
	9.114	-1.79609	--
	9.134	-2.88657	--
	9.166	-1.34707	--
	9.2	-1.60365	--
	9.22	-0.384877	--
	9.229	-0.513168	--
	9.271	-1.98853	--
	9.297	-0.962189	--
	9.333	-0.256584	--
	9.355	-0.320731	--
	9.379	-0.256584	--
	9.405	-0.577316	--
	9.436	-1.15463	--
	9.47	-1.41121	--
	9.5	-1.02634	--
	9.523	-0.833898	--
	9.543	-1.09048	--
	9.569	-1.47536	--
	9.607	-0.256584	--
	9.633	-0.128292	--
	9.658	-0.0641459	--
	9.684	-1.53951	--
	9.708	-0.577316	--
	9.734	-1.02634	--
	9.785	-0.769755	--
	9.815	-1.21878	--
	9.841	-0.449022	--
	9.867	-0.641459	--
	9.909	-1.09048	--
	9.935	0.641459	--
	9.961	-0.641459	--
	9.982	-0.833898	--
	10.01	-0.833898	--
	10.047	-0.384877	--
	10.086	-0.577316	--
	10.119	-0.577316	--
	10.145	-0.320731	--
	10.161	-0.577316	--
	10.172	-0.513168	--
	10.212	-0.256584	--
	10.24	-1.34707	--
	10.262	-0.128292	--
	10.295	-0.833898	--
	10.332	-0.962189	--
	10.377	-0.256584	--
	10.398	0.705607	--
	10.421	-0.577316	--
	10.466	-0.449022	--
	10.487	0.577316	--
	10.512	-0.705607	--
	10.534	-0.0641459	--
	10.551	-0.320731	--
	10.593	-0.192438	--
	10.62	-0.641459	--
	10.658	-0.192438	--
	10.676	0.256584	--
	10.7	-0.192438	--
	10.742	0.128292	--
	10.759	-0.769755	--
	10.769	-0.320731	--
	10.801	-0.384877	--
	10.81	-0.256584	--
	10.849	-0.577316	--
	10.869	-0.449022	--
	10.903	-0.962189	--
	10.93	0.320731	--
	10.956	-0.833898	--
	11.005	0.384877	--
	11.026	0	--
	11.052	0.513168	--
	11.078	0.0641459	--
	11.115	0.641459	--
	11.144	0.577316	--
	11.165	0.833898	--
	11.174	-0.256584	--
	11.221	0	--
	11.243	1.21878	--
	11.287	-0.0641459	--
	11.315	0.577316	--
	11.336	0.256584	--
	11.355	0.0641459	--
	11.385	0.962189	--
	11.409	1.47536	--
	11.433	0.898046	--
	11.461	0.641459	--
	11.5	0.577316	--
	11.526	1.09048	--
	11.575	1.09048	--
	11.596	1.47536	--
	11.617	0.320731	--
	11.627	1.09048	--
	11.668	0.705607	--
	11.701	1.98853	--
	11.734	0.192438	--
	11.762	0.898046	--
	11.791	0.384877	--
	11.833	0.833898	--
	11.859	-0.256584	--
	11.885	0.705607	--
	11.905	1.02634	--
	11.947	1.21878	--
	11.966	1.21878	--
	12.002	0.769755	--
	12.029	0.962189	--
	12.057	0.833898	--
	12.092	0	--
	12.142	0.962189	--
	12.163	1.53951	--
	12.183	0.513168	--
	12.214	1.47536	--
	12.241	0.769755	--
	12.268	0.705607	--
	12.303	1.34707	--
	12.329	0.577316	--
	12.356	0.705607	--
	12.39	0.577316	--
	12.427	1.28292	--
	12.447	1.09048	--
	12.474	0.320731	--
	12.508	0.513168	--
	12.534	0.705607	--
	12.56	0.320731	--
	12.586	1.6678	--
	12.615	-0.449022	--
	12.639	1.21878	--
	12.656	0.577316	--
	12.705	2.11682	--
	12.733	1.09048	--
	12.769	1.21878	--
	12.795	1.02634	--
	12.815	0.320731	--
	12.838	1.28292	--
	12.866	0.769755	--
	12.895	1.02634	--
	12.919	0.898046	--
	12.946	0.898046	--
	12.99	0.384877	--
	13.019	0.577316	--
	13.04	0.962189	--
	13.074	1.73194	--
	13.096	0.384877	--
	13.121	1.09048	--
	13.131	1.60365	--
	13.17	0.833898	--
	13.193	0.962189	--
	13.203	1.86023	--
	13.25	0.769755	--
	13.281	1.34707	--
	13.303	-0.320731	--
	13.329	1.02634	--
	13.355	0.898046	--
	13.377	0.641459	--
	13.387	0.898046	--
	13.425	1.09048	--
	13.45	0.577316	--
	13.499	-0.128292	--
	13.55	0.898046	--
	13.576	0.705607	--
	13.603	0.962189	--
	13.625	1.86023	--
	13.646	0.769755	--
	13.667	1.47536	--
	13.711	1.98853	--
	13.732	1.47536	--
	13.76	1.15463	--
	13.801	0.256584	--
	13.856	1.34707	--
	13.883	2.11682	--
	13.903	1.98853	--
	13.922	1.21878	--
	13.948	1.79609	--
	13.974	1.34707	--
	14.006	1.53951	--
	14.015	0.705607	--
	14.034	1.86023	--
	14.089	1.73194	--
	14.116	1.92438	--
	14.151	1.60365	--
	14.173	1.41121	--
	14.196	1.21878	--
	14.215	0.513168	--
	14.236	1.53951	--
	14.275	1.98853	--
	14.291	1.53951	--
	14.316	2.05267	--
	14.366	0.962189	--
	14.392	0.769755	--
	14.434	1.34707	--
	14.444	-0.0641459	--
	14.464	1.09048	--
	14.486	0.449022	--
	14.511	0.577316	--
	14.543	0.320731	--
	14.569	0.705607	--
	14.62	1.09048	--
	14.643	0.513168	--
	14.665	0.320731	--
	14.692	0.192438	--
	14.714	0	--
	14.731	-0.192438	--
	14.754	0.705607	--
	14.78	0.192438	--
	14.813	1.6678	--
	14.84	0.769755	--
	14.895	0.192438	--
	14.915	0.256584	--
	14.924	0.513168	--
	14.959	1.21878	--
	14.977	0.962189	--
	14.994	0.577316	--
	15.02	0.449022	--
	15.044	1.21878	--
	15.07	0.128292	--
	15.111	1.98853	--
	15.161	0.577316	--
	15.196	0.577316	--
	15.206	-0.384877	--
	15.238	0.705607	--
	15.264	-0.0641459	--
	15.29	0.192438	--
	15.3	0.898046	--
	15.338	0.192438	--
	15.345	0.449022	--
	15.388	0.641459	--
	15.432	0.705607	--
	15.466	0.0641459	--
	15.492	0.0641459	--
	15.505	0.320731	--
	15.515	-0.0641459	--
	15.553	0.962189	--
	15.563	0.449022	--
	15.606	0.769755	--
	15.643	0.320731	--
	15.678	0.577316	--
	15.687	0.641459	--
	15.724	0.256584	--
	15.746	0.256584	--
	15.772	0.962189	--
	15.813	0.192438	--
	15.835	0.192438	--
	15.862	0.192438	--
	15.887	0.192438	--
	15.939	0.769755	--
	15.981	0.192438	--
	15.993	-0.0641459	--
	16.01	0.320731	--
	16.02	1.41121	--
	16.036	-0.0641459	--
	16.063	0.577316	--
	16.097	0.705607	--
	16.106	0.513168	--
	16.146	1.15463	--
	16.169	0.320731	--
	16.214	0.449022	--
	16.238	0.705607	--
	16.262	0.320731	--
	16.287	-1.53951	--
	16.297	0.513168	--
	16.334	1.15463	--
	16.36	0.641459	--
	16.37	0.641459	--
	16.421	0.128292	--
	16.447	0.192438	--
	16.497	1.41121	--
	16.524	0.513168	--
	16.546	0.128292	--
	16.558	0.384877	--
	16.58	0.192438	--
	16.611	0.641459	--
	16.628	0.192438	--
	16.669	-0.0641459	--
	16.696	0.577316	--
	16.721	0.513168	--
	16.768	0.256584	--
	16.794	0.128292	--
	16.817	0.384877	--
	16.827	0.769755	--
	16.846	-1.02634	--
	16.873	0.769755	--
	16.907	0.320731	--
	16.916	0.128292	--
	16.954	-0.0641459	--
	16.975	0.0641459	--
	17.015	0.320731	--
	17.042	0.641459	--
	17.063	0.449022	--
	17.073	0.192438	--
	17.098	0.0641459	--
	17.125	0.128292	--
	17.176	0.320731	--
	17.203	0.577316	--
	17.227	0.384877	--
	17.266	-0.0641459	--
	17.3	0.384877	--
	17.327	1.34707	--
	17.349	0.641459	--
	17.373	0.449022	--
	17.398	-0.513168	--
	17.424	-0.0641459	--
	17.475	0.192438	--
	17.5	0.513168	--
	17.535	0.384877	--
	17.582	0.833898	--
	17.614	0.769755	--
	17.624	0.320731	--
	17.656	0.192438	--
	17.682	0.192438	--
	17.708	0.128292	--
	17.744	0.705607	--
	17.787	0.449022	--
	17.813	0.449022	--
	17.838	-0.384877	--
	17.847	-0.0641459	--
	17.881	0.128292	--
	17.903	-0.513168	--
	17.93	-0.577316	--
	17.952	-0.577316	--
	17.979	-0.128292	--
	18.01	-0.449022	--
	18.051	-0.192438	--
	18.073	-0.449022	--
	18.105	0.320731	--
	18.151	0.577316	--
	18.185	-0.449022	--
	18.197	0.513168	--
	18.215	-0.962189	--
	18.233	-1.47536	--
	18.265	0.449022	--
	18.291	0.641459	--
	18.316	1.47536	--
	18.352	0.962189	--
	18.361	0.256584	--
	18.397	0.192438	--
	18.442	0.320731	--
	18.451	0.449022	--
	18.474	-0.192438	--
	18.507	0.577316	--
	18.538	0.449022	--
	18.548	0.320731	--
	18.585	0.833898	--
	18.619	0.769755	--
	18.658	0.513168	--
	18.68	0.192438	--
	18.713	0.641459	--
	18.723	0.449022	--
	18.76	0.384877	--
	18.796	0.192438	--
	18.805	0.320731	--
	18.828	0.705607	--
	18.851	-0.256584	--
	18.876	-0.384877	--
	18.921	-1.34707	--
	18.931	0.128292	--
	18.973	-0.513168	--
	18.983	-0.449022	--
	19.015	-0.513168	--
	19.025	-0.0641459	--
	19.062	0.0641459	--
	19.088	-0.128292	--
	19.107	-0.320731	--
	19.129	0.0641459	--
	19.178	-0.833898	--
	19.199	0.128292	--
	19.239	-0.833898	--
	19.257	1.09048	--
	19.297	-0.577316	--
	19.322	-1.28292	--
	19.348	-0.384877	--
	19.374	-1.09048	--
	19.392	-1.02634	--
	19.417	-1.02634	--
	19.472	-1.28292	--
	19.493	-0.898046	--
	19.521	-0.962189	--
	19.546	-1.09048	--
	19.575	-0.962189	--
	19.601	-0.705607	--
	19.626	-0.256584	--
	19.648	-0.0641459	--
	19.675	-0.256584	--
	19.701	-0.0641459	--
	19.75	-0.513168	--
	19.777	-0.320731	--
	19.805	-2.11682	--
	19.833	-1.28292	--
	19.861	-0.577316	--
	19.886	-0.128292	--
	19.915	-1.60365	--
	19.941	-0.705607	--
	19.967	-0.705607	--
	20.012	-0.705607	--
	20.045	-0.128292	--
	20.066	-0.256584	--
	20.1	-0.449022	--
	20.136	-0.705607	--
	20.163	0.833898	--
	20.183	-2.11682	--
	20.214	-0.192438	--
	20.234	-0.577316	--
	20.245	-0.898046	--
	20.285	-0.128292	--
	20.316	-0.962189	--
	20.338	-1.47536	--
	20.371	-1.09048	--
	20.397	-1.15463	--
	20.424	-0.449022	--
	20.45	-0.769755	--
	20.479	-0.898046	--
	20.501	-0.384877	--
	20.523	-0.192438	--
	20.56	-0.962189	--
	20.594	-0.256584	--
	20.622	-0.513168	--
	20.66	-0.577316	--
	20.686	-0.513168	--
	20.711	-0.449022	--
	20.733	-0.705607	--
	20.762	-0.577316	--
	20.779	-1.09048	--
	20.799	-0.833898	--
	20.836	-0.705607	--
	20.874	-1.15463	--
	20.909	-1.86023	--
	20.943	-0.962189	--
	20.969	-0.898046	--
	20.996	-1.15463	--
	21.018	-1.41121	--
	21.045	-1.02634	--
	21.071	-0.962189	--
	21.097	-1.15463	--
	21.145	-0.513168	--
	21.173	-0.641459	--
	21.223	0.192438	--
	21.256	-1.34707	--
	21.278	-1.21878	--
	21.305	-1.28292	--
	21.333	-1.21878	--
	21.36	-0.962189	--
	21.381	-1.34707	--
	21.422	-1.02634	--
	21.446	-1.21878	--
	21.475	0.705607	--
	21.514	-1.34707	--
	21.543	-1.15463	--
	21.566	-0.641459	--
	21.598	-0.898046	--
	21.628	-0.962189	--
	21.637	-0.641459	--
	21.655	-0.705607	--
	21.697	-0.449022	--
	21.713	0.0641459	--
	21.758	-0.833898	--
	21.788	-0.769755	--
	21.821	0.128292	--
	21.848	-0.577316	--
	21.875	0.0641459	--
	21.906	-0.192438	--
	21.927	-0.705607	--
	21.949	-0.705607	--
	21.994	-0.577316	--
	22.03	-0.577316	--
	22.05	-0.384877	--
	22.079	-0.449022	--
	22.107	-1.41121	--
	22.128	-0.256584	--
	22.151	-0.0641459	--
	22.162	-0.384877	--
	22.192	-0.641459	--
	22.214	-0.0641459	--
	22.263	-0.192438	--
	22.295	0.320731	--
	22.322	0.320731	--
	22.351	-0.192438	--
	22.38	1.47536	--
	22.406	-0.513168	--
	22.434	-0.577316	--
	22.458	0.0641459	--
	22.481	-1.21878	--
	22.497	-0.962189	--
	22.507	-0.192438	--
	22.548	-0.256584	--
	22.569	-0.128292	--
	22.589	-0.128292	--
	22.635	0.192438	--
	22.661	-0.192438	--
	22.689	0.192438	--
	22.716	1.53951	--
	22.737	0.449022	--
	22.787	0.449022	--
	22.797	0.256584	--
	22.852	1.41121	--
	22.875	0.192438	--
	22.901	0.192438	--
	22.956	-0.577316	--
	22.984	0.0641459	--
	23.006	0.128292	--
	23.016	0.577316	--
	23.047	-0.962189	--
	23.103	0.192438	--
	23.131	0.128292	--
	23.14	-0.577316	--
	23.156	0.0641459	--
	23.187	-0.449022	--
	23.233	-0.0641459	--
	23.261	0.320731	--
	23.271	0.0641459	--
	23.313	-0.833898	--
	23.323	0.449022	--
	23.379	0.0641459	--
	23.401	-0.0641459	--
	23.411	0.0641459	--
	23.441	-0.641459	--
	23.45	0.0641459	--
	23.484	-0.449022	--
	23.52	-0.705607	--
	23.546	-1.6678	--
	23.555	-0.769755	--
	23.594	-0.320731	--
	23.641	-0.577316	--
	23.676	-0.192438	--
	23.698	-0.962189	--
	23.707	-0.449022	--
	23.727	-0.192438	--
	23.779	-1.09048	--
	23.788	-0.384877	--
	23.817	-0.641459	--
	23.843	-0.577316	--
	23.874	-0.256584	--
	23.913	-1.15463	--
	23.939	-0.833898	--
	23.965	-0.577316	--
	23.986	-0.705607	--
	24.011	-0.384877	--
	24.057	-0.962189	--
	24.105	-0.705607	--
	24.132	-1.47536	--
	24.165	-0.449022	--
	24.204	-0.320731	--
	24.214	-0.256584	--
	24.249	-0.192438	--
	24.271	-0.256584	--
	24.299	-0.192438	--
	24.309	-0.833898	--
	24.339	-0.192438	--
	24.401	-0.449022	--
	24.411	0.192438	--
	24.464	-0.320731	--
	24.474	-0.320731	--
	24.531	-0.128292	--
	24.543	-0.320731	--
	24.565	-0.577316	--
	24.587	0.641459	--
	24.605	-0.128292	--
	24.626	-0.192438	--
	24.681	-1.02634	--
	24.71	-0.0641459	--
	24.737	0.0641459	--
	24.779	0.320731	--
	24.802	0.128292	--
	24.828	-0.320731	--
	24.854	-0.128292	--
	24.876	-0.577316	--
	24.895	-0.192438	--
	24.917	-0.128292	--
	24.964	-0.513168	--
	24.997	-0.192438	--
	25.02	0.128292	--
	25.068	-0.0641459	--
	25.089	-0.449022	--
	25.113	0.513168	--
	25.134	-0.256584	--
	25.154	-0.962189	--
	25.18	-1.09048	--
	25.206	-2.43755	--
	25.257	-0.320731	--
	25.285	0.128292	--
	25.307	-0.0641459	--
	25.347	-0.320731	--
	25.373	-0.384877	--
	25.395	-0.256584	--
	25.421	0.513168	--
	25.447	-0.513168	--
	25.468	-0.320731	--
	25.497	-0.898046	--
	25.537	-0.320731	--
	25.57	-0.320731	--
	25.612	-1.21878	--
	25.639	-0.384877	--
	25.655	-0.0641459	--
	25.665	0.962189	--
	25.682	0.256584	--
	25.704	-0.449022	--
	25.729	0.577316	--
	25.76	0.320731	--
	25.789	-0.705607	--
	25.829	-0.577316	--
	25.878	-0.256584	--
	25.901	-0.192438	--
	25.927	-0.128292	--
	25.953	-0.128292	--
	25.979	-0.0641459	--
	26.004	-0.641459	--
	26.03	0.320731	--
	26.064	-0.705607	--
	26.091	0.192438	--
	26.131	-0.833898	--
	26.181	-0.128292	--
	26.202	-0.449022	--
	26.229	-0.769755	--
	26.238	-0.320731	--
	26.26	-0.384877	--
	26.285	-0.705607	--
	26.319	-0.192438	--
	26.348	-0.577316	--
	26.376	-0.384877	--
	26.415	-1.09048	--
	26.461	-0.577316	--
	26.478	-0.705607	--
	26.499	-0.833898	--
	26.521	-1.53951	--
	26.547	-0.962189	--
	26.568	-0.384877	--
	26.61	-0.833898	--
	26.641	-0.641459	--
	26.676	-0.256584	--
	26.715	-0.833898	--
	26.761	-0.192438	--
	26.784	-0.256584	--
	26.8	-0.320731	--
	26.822	-0.0641459	--
	26.848	-0.577316	--
	26.88	-0.577316	--
	26.902	-0.577316	--
	26.924	-0.449022	--
	26.957	-0.833898	--
	27.001	-2.11682	--
	27.043	0.256584	--
	27.065	-0.705607	--
	27.086	-0.769755	--
	27.108	-0.320731	--
	27.145	-1.6678	--
	27.167	-1.21878	--
	27.198	-0.962189	--
	27.224	-0.513168	--
	27.248	-1.09048	--
	27.296	-0.320731	--
	27.332	-0.833898	--
	27.359	-0.577316	--
	27.386	-1.09048	--
	27.412	-1.15463	--
	27.447	-1.09048	--
	27.47	-0.449022	--
	27.5	-0.320731	--
	27.526	0.577316	--
	27.554	0.513168	--
	27.604	-0.449022	--
	27.642	-0.192438	--
	27.669	-0.192438	--
	27.695	0.320731	--
	27.726	-0.0641459	--
	27.753	0.577316	--
	27.776	0.384877	--
	27.806	-0.256584	--
	27.832	0.128292	--
	27.856	0.320731	--
	27.893	-0.192438	--
	27.931	0.192438	--
	27.957	0	--
	27.982	0.256584	--
	28.018	-0.128292	--
	28.044	-0.192438	--
	28.066	0.320731	--
	28.095	1.53951	--
	28.122	0.192438	--
	28.15	0.384877	--
	28.191	0.513168	--
	28.232	0.384877	--
	28.252	0.641459	--
	28.262	0.449022	--
	28.306	0.449022	--
	28.332	-0.577316	--
	28.363	-0.0641459	--
	28.384	0.0641459	--
	28.411	0.192438	--
	28.46	0.128292	--
	28.482	-0.192438	--
	28.502	-0.128292	--
	28.536	-0.0641459	--
	28.568	0.256584	--
	28.59	0.384877	--
	28.613	0.256584	--
	28.635	-0.449022	--
	28.656	-0.192438	--
	28.683	-0.0641459	--
	28.731	0.449022	--
	28.753	0.898046	--
	28.776	0.898046	--
	28.832	0.449022	--
	28.853	0.449022	--
	28.877	0	--
	28.897	0.449022	--
	28.925	0.0641459	--
	28.935	0.641459	--
	28.968	0.0641459	--
	29.013	0.449022	--
	29.041	0.769755	--
	29.052	0.769755	--
	29.102	0.320731	--
	29.12	0.577316	--
	29.142	0.320731	--
	29.166	0.769755	--
	29.198	0.320731	--
	29.218	-0.192438	--
	29.242	0.192438	--
	29.285	1.60365	--
	29.307	0.320731	--
	29.341	0.962189	--
	29.377	1.34707	--
	29.397	1.34707	--
	29.421	0.898046	--
	29.453	0.449022	--
	29.472	2.24511	--
	29.495	1.28292	--
	29.519	0.256584	--
	29.564	1.02634	--
	29.59	0.384877	--
	29.626	0.962189	--
	29.661	1.02634	--
	29.687	1.60365	--
	29.708	1.21878	--
	29.737	0.513168	--
	29.763	1.28292	--
	29.785	1.15463	--
	29.832	1.21878	--
	29.864	1.73194	--
	29.897	0.449022	--
	29.918	0.513168	--
	29.939	1.92438	--
	29.949	1.15463	--
	29.974	1.98853	--
	30.005	-0.128292	--
	30.025	1.02634	--
	30.035	0.769755	--
	30.083	1.15463	--
	30.108	0.577316	--
	30.14	0.833898	--
	30.168	0.833898	--
	30.195	1.02634	--
	30.233	0.449022	--
	30.259	0.641459	--
	30.29	1.47536	--
	30.315	1.21878	--
	30.342	0.962189	--
	30.389	0.0641459	--
	30.424	0.384877	--
	30.451	0.192438	--
	30.478	0.577316	--
	30.495	0.577316	--
	30.516	-0.769755	--
	30.534	0.384877	--
	30.562	0.641459	--
	30.589	1.15463	--
	30.61	0.769755	--
	30.64	0.705607	--
	30.679	0.769755	--
	30.689	0.898046	--
	30.724	0.449022	--
	30.747	0.641459	--
	30.782	0.962189	--
	30.792	0.962189	--
	30.833	0.833898	--
	30.854	1.02634	--
	30.877	0.898046	--
	30.945	2.43755	--
	30.978	1.47536	--
	30.988	2.62999	--
	31.023	1.53951	--
	31.033	2.30926	--
	31.073	2.5017	--
	31.083	2.43755	--
	31.119	2.11682	--
	31.139	2.11682	--
	31.149	1.6678	--
	31.208	1.02634	--
	31.241	2.05267	--
	31.25	0.833898	--
	31.271	1.6678	--
	31.292	1.15463	--
	31.314	1.41121	--
	31.354	0.192438	--
	31.381	0.769755	--
	31.407	0.0641459	--
	31.456	1.15463	--
	31.479	1.09048	--
	31.51	0.513168	--
	31.536	0.898046	--
	31.56	0.384877	--
	31.577	1.34707	--
	31.597	0.962189	--
	31.638	0.577316	--
	31.665	0.192438	--
	31.691	1.02634	--
	31.747	1.15463	--
	31.774	1.15463	--
	31.806	1.21878	--
	31.827	1.09048	--
	31.851	1.34707	--
	31.872	1.15463	--
	31.894	1.60365	--
	31.932	1.73194	--
	31.955	1.15463	--
	32.006	0.192438	--
	32.052	0.128292	--
	32.061	0.769755	--
	32.098	0.833898	--
	32.116	0.898046	--
	32.141	0.833898	--
	32.157	1.6678	--
	32.18	1.79609	--
	32.219	1.73194	--
	32.241	1.73194	--
	32.277	0.833898	--
	32.326	1.47536	--
	32.352	2.05267	--
	32.383	0.898046	--
	32.41	2.18096	--
	32.438	1.92438	--
	32.464	1.41121	--
	32.489	1.47536	--
	32.524	2.5017	--
	32.558	1.98853	--
	32.601	2.24511	--
	32.627	2.3734	--
	32.653	3.01487	--
	32.677	2.43755	--
	32.698	2.82243	--
	32.72	2.75828	--
	32.73	2.56584	--
	32.761	2.56584	--
	32.787	3.14316	--
	32.837	3.39974	--
	32.873	2.5017	--
	32.9	1.60365	--
	32.927	3.01487	--
	32.961	1.98853	--
	32.982	2.82243	--
	33.006	2.11682	--
	33.016	2.24511	--
	33.039	2.56584	--
	33.075	2.75828	--
	33.113	1.60365	--
	33.163	3.72047	--
	33.185	2.75828	--
	33.209	2.75828	--
	33.237	3.39974	--
	33.255	3.97706	--
	33.277	3.20731	--
	33.297	3.46389	--
	33.328	3.59218	--
	33.361	2.5017	--
	33.399	4.74681	--
	33.444	3.14316	--
	33.471	2.69414	--
	33.494	3.65633	--
	33.525	2.62999	--
	33.547	3.52804	--
	33.571	3.01487	--
	33.58	3.46389	--
	33.622	3.27145	--
	33.649	3.39974	--
	33.683	3.84877	--
	33.722	2.43755	--
	33.748	3.78462	--
	33.773	3.01487	--
	33.806	3.14316	--
	33.832	3.27145	--
	33.856	3.14316	--
	33.884	3.59218	--
	33.919	3.65633	--
	33.942	3.27145	--
	33.981	3.14316	--
	34.004	3.20731	--
	34.02	3.27145	--
	34.031	2.75828	--
	34.051	3.91291	--
	34.086	4.16949	--
	34.115	3.01487	--
	34.146	3.07901	--
	34.172	3.07901	--
	34.198	3.01487	--
	34.245	3.46389	--
	34.281	3.3356	--
	34.307	3.78462	--
	34.33	3.52804	--
	34.347	4.23364	--
	34.38	3.72047	--
	34.4	3.65633	--
	34.41	3.91291	--
	34.456	3.72047	--
	34.474	3.14316	--
	34.522	4.10535	--
	34.561	3.07901	--
	34.587	3.27145	--
	34.609	1.86023	--
	34.635	2.5017	--
	34.663	3.52804	--
	34.692	3.65633	--
	34.719	4.49022	--
	34.738	3.46389	--
	34.748	3.3356	--
	34.788	3.72047	--
	34.822	4.55437	--
	34.845	3.3356	--
	34.869	3.01487	--
	34.887	3.59218	--
	34.919	3.91291	--
	34.953	3.3356	--
	34.983	3.07901	--
	35.004	3.27145	--
	35.029	4.16949	--
	35.07	2.95072	--
	35.101	3.14316	--
	35.128	3.72047	--
	35.154	2.95072	--
	35.17	3.78462	--
	35.215	2.95072	--
	35.225	3.20731	--
	35.264	3.65633	--
	35.29	3.39974	--
	35.339	3.27145	--
	35.349	3.39974	--
	35.383	3.01487	--
	35.41	3.20731	--
	35.431	3.59218	--
	35.443	3.39974	--
	35.48	3.07901	--
	35.505	1.53951	--
	35.524	3.97706	--
	35.542	3.65633	--
	35.579	3.39974	--
	35.589	3.84877	--
	35.619	3.97706	--
	35.658	3.91291	--
	35.667	3.52804	--
	35.707	4.23364	--
	35.739	3.97706	--
	35.769	3.97706	--
	35.798	3.59218	--
	35.818	4.29779	--
	35.857	3.78462	--
	35.874	3.65633	--
	35.897	4.0412	--
	35.928	4.29779	--
	35.949	3.39974	--
	35.981	3.59218	--
	36.014	3.59218	--
	36.045	3.20731	--
	36.072	3.14316	--
	36.09	3.27145	--
	36.127	1.60365	--
	36.145	2.75828	--
	36.167	3.65633	--
	36.203	2.82243	--
	36.213	2.75828	--
	36.266	3.14316	--
	36.293	2.88657	--
	36.32	3.39974	--
	36.329	3.14316	--
	36.351	3.52804	--
	36.391	3.46389	--
	36.414	3.65633	--
	36.435	3.01487	--
	36.445	2.5017	--
	36.482	2.5017	--
	36.506	3.3356	--
	36.54	3.01487	--
	36.562	3.01487	--
	36.597	3.01487	--
	36.639	3.01487	--
	36.665	2.18096	--
	36.691	3.01487	--
	36.7	2.88657	--
	36.742	1.34707	--
	36.77	2.88657	--
	36.796	2.88657	--
	36.833	3.27145	--
	36.859	2.43755	--
	36.883	2.69414	--
	36.921	2.69414	--
	36.943	2.5017	--
	36.969	3.59218	--
	36.99	2.95072	--
	37.026	3.59218	--
	37.062	3.46389	--
	37.079	3.20731	--
	37.089	2.88657	--
	37.13	3.46389	--
	37.149	3.3356	--
	37.195	2.82243	--
	37.219	3.97706	--
	37.244	3.14316	--
	37.274	4.16949	--
	37.297	3.46389	--
	37.338	3.46389	--
	37.364	3.91291	--
	37.4	3.46389	--
	37.427	3.3356	--
	37.454	3.46389	--
	37.495	2.82243	--
	37.521	2.5017	--
	37.543	2.88657	--
	37.571	2.11682	--
	37.596	3.07901	--
	37.635	3.14316	--
	37.657	3.46389	--
	37.699	2.75828	--
	37.724	4.29779	--
	37.746	2.3734	--
	37.795	2.88657	--
	37.822	3.91291	--
	37.832	4.29779	--
	37.872	3.46389	--
	37.89	3.65633	--
	37.9	3.91291	--
	37.935	3.27145	--
	37.984	3.3356	--
	38.013	3.59218	--
	38.063	3.01487	--
	38.073	3.01487	--
	38.106	2.95072	--
	38.115	3.72047	--
	38.154	3.46389	--
	38.175	3.20731	--
	38.185	3.65633	--
	38.211	2.75828	--
	38.239	3.91291	--
	38.266	3.39974	--
	38.318	3.27145	--
	38.344	3.3356	--
	38.377	3.52804	--
	38.4	2.82243	--
	38.436	4.0412	--
	38.463	5.64485	--
	38.473	2.95072	--
	38.514	3.72047	--
	38.54	2.88657	--
	38.548	3.59218	--
	38.588	3.52804	--
	38.605	3.14316	--
	38.65	3.72047	--
	38.677	3.01487	--
	38.699	3.01487	--
	38.709	2.5017	--
	38.732	3.14316	--
	38.779	3.46389	--
	38.804	3.52804	--
	38.814	3.39974	--
	38.867	3.65633	--
	38.904	3.97706	--
	38.914	3.59218	--
	38.948	3.39974	--
	38.958	3.59218	--
	38.989	3.84877	--
	38.999	3.65633	--
	39.028	2.82243	--
	39.057	3.91291	--
	39.079	3.14316	--
	39.129	2.95072	--
	39.162	3.39974	--
	39.189	4.0412	--
	39.211	3.01487	--
	39.241	4.49022	--
	39.251	3.14316	--
	39.291	3.07901	--
	39.322	4.68266	--
	39.35	3.20731	--
	39.401	3.52804	--
	39.436	4.23364	--
	39.446	3.91291	--
	39.477	2.62999	--
	39.486	4.10535	--
	39.528	2.43755	--
	39.538	3.65633	--
	39.581	3.3356	--
	39.62	2.95072	--
	39.63	3.65633	--
	39.682	3.39974	--
	39.714	2.3734	--
	39.724	3.3356	--
	39.745	3.20731	--
	39.767	2.75828	--
	39.791	2.82243	--
	39.808	3.3356	--
	39.838	2.75828	--
	39.864	3.07901	--
	39.909	2.95072	--
	39.96	3.3356	--
	39.99	3.14316	--
	40.016	3.65633	--
	40.038	4.42608	--
	40.065	3.97706	--
	40.092	3.91291	--
	40.118	3.78462	--
	40.15	3.52804	--
	40.172	3.59218	--
	40.222	3.20731	--
	40.267	2.5017	--
	40.291	4.81095	--
	40.312	3.27145	--
	40.339	3.14316	--
	40.361	3.65633	--
	40.388	3.84877	--
	40.409	3.27145	--
	40.433	3.46389	--
	40.459	3.52804	--
	40.516	3.39974	--
	40.565	2.24511	--
	40.594	2.82243	--
	40.621	1.79609	--
	40.647	1.79609	--
	40.673	3.3356	--
	40.7	2.69414	--
	40.727	2.5017	--
	40.749	2.62999	--
	40.771	3.14316	--
	40.825	3.01487	--
	40.853	3.07901	--
	40.881	3.20731	--
	40.903	3.39974	--
	40.924	2.95072	--
	40.948	2.69414	--
	40.973	2.3734	--
	41.003	2.75828	--
	41.024	3.39974	--
	41.056	3.3356	--
	41.102	4.10535	--
	41.13	3.20731	--
	41.157	2.95072	--
	41.179	3.65633	--
	41.196	3.14316	--
	41.22	3.07901	--
	41.245	2.88657	--
	41.27	2.75828	--
	41.297	3.39974	--
	41.323	4.23364	--
	41.371	3.14316	--
	41.412	3.14316	--
	41.434	2.82243	--
	41.452	2.88657	--
	41.462	2.88657	--
	41.492	2.3734	--
	41.501	3.14316	--
	41.524	2.62999	--
	41.552	2.75828	--
	41.578	2.5017	--
	41.626	2.95072	--
	41.664	1.53951	--
	41.692	2.05267	--
	41.718	1.21878	--
	41.739	2.56584	--
	41.758	2.18096	--
	41.78	2.88657	--
	41.811	2.3734	--
	41.832	2.62999	--
	41.855	1.73194	--
	41.896	2.3734	--
	41.936	1.98853	--
	41.964	2.30926	--
	41.99	2.82243	--
	42.016	1.6678	--
	42.038	2.3734	--
	42.067	2.24511	--
	42.1	1.28292	--
	42.125	1.41121	--
	42.169	1.21878	--
	42.2	0.833898	--
	42.241	1.09048	--
	42.266	1.92438	--
	42.276	1.86023	--
	42.293	3.14316	--
	42.319	3.27145	--
	42.329	3.14316	--
	42.363	1.73194	--
	42.373	3.59218	--
	42.424	4.42608	--
	42.434	4.36193	--
	42.466	4.68266	--
	42.496	3.27145	--
	42.505	4.29779	--
	42.534	4.74681	--
	42.544	5.06754	--
	42.579	5.19582	--
	42.607	5.38827	--
	42.619	5.70898	--
	42.675	6.15801	--
	42.685	6.35046	--
	42.718	6.73536	--
	42.728	7.5051	--
	42.748	7.1202	--
	42.758	7.24852	--
	42.802	8.0824	--
	42.813	9.23704	--
	42.84	9.42949	--
	42.856	9.23704	--
	42.866	9.30117	--
	42.924	10.6483	--
	42.934	10.7124	--
	42.955	12.316	--
	42.965	11.867	--
	42.982	12.6368	--
	42.992	11.867	--
	43.025	14.4329	--
	43.055	14.2404	--
	43.064	16.3572	--
	43.108	15.8441	--
	43.119	15.5875	--
	43.157	16.678	--
	43.18	16.2289	--
	43.19	17.127	--
	43.227	17.7685	--
	43.237	17.8967	--
	43.273	18.4099	--
	43.283	18.9231	--
	43.34	20.2702	--
	43.35	20.8474	--
	43.369	20.3343	--
	43.379	21.1682	--
	43.411	20.5909	--
	43.421	20.7833	--
	43.455	22.4511	--
	43.465	22.4511	--
	43.49	22.836	--
	43.517	23.7982	--
	43.551	23.8623	--
	43.561	24.7604	--
	43.58	23.8623	--
	43.626	23.285	--
	43.644	23.9265	--
	43.654	23.7982	--
	43.684	23.8623	--
	43.694	24.0547	--
	43.713	23.4774	--
	43.723	24.0547	--
	43.776	23.7982	--
	43.786	23.9265	--
	43.804	24.0547	--
	43.813	23.6699	--
	43.847	23.7982	--
	43.878	23.8623	--
	43.887	23.734	--
	43.917	25.2094	--
	43.927	24.8887	--
	43.95	24.1831	--
	43.994	25.7867	--
	44.004	26.0433	--
	44.021	26.4282	--
	44.061	25.5302	--
	44.071	26.2357	--
	44.105	26.6206	--
	44.117	26.7489	--
	44.127	26.2999	--
	44.161	26.364	--
	44.171	26.0433	--
	44.227	26.7489	--
	44.237	27.0055	--
	44.255	26.1716	--
	44.299	25.915	--
	44.309	26.364	--
	44.344	26.364	--
	44.354	26.6206	--
	44.37	26.2357	--
	44.38	26.8131	--
	44.434	27.3904	--
	44.444	27.5828	--
	44.461	28.2243	--
	44.471	27.8394	--
	44.509	28.096	--
	44.525	28.2884	--
	44.557	27.9677	--
	44.57	28.7374	--
	44.596	28.8016	--
	44.606	27.6469	--
	44.641	27.9677	--
	44.651	28.0318	--
	44.667	27.3904	--
	44.677	28.0318	--
	44.718	27.0055	--
	44.727	27.2621	--
	44.776	27.3262	--
	44.786	27.0696	--
	44.806	26.8131	--
	44.816	26.8772	--
	44.872	25.7867	--
	44.883	25.8509	--
	44.901	26.4282	--
	44.911	27.0055	--
	44.965	26.8772	--
	44.975	27.1979	--
	44.993	28.1601	--
	45.003	26.8131	--
	45.024	28.0318	--
	45.052	27.3904	--
	45.08	28.1601	--
	45.09	27.8394	--
	45.122	28.2243	--
	45.132	28.2884	--
	45.186	28.545	--
	45.196	27.2621	--
	45.217	28.2243	--
	45.228	26.8772	--
	45.247	27.3262	--
	45.257	26.6206	--
	45.312	27.1338	--
	45.322	26.1716	--
	45.364	26.1716	--
	45.375	26.8131	--
	45.417	26.4923	--
	45.427	27.0055	--
	45.459	27.6469	--
	45.484	28.3526	--
	45.494	28.096	--
	45.55	29.443	--
	45.56	27.9677	--
	45.579	29.2506	--
	45.589	27.9035	--
	45.627	28.2884	--
	45.65	28.2243	--
	45.66	28.2884	--
	45.68	28.4167	--
	45.722	27.7753	--
	45.732	27.7753	--
	45.787	27.5828	--
	45.797	27.5187	--
	45.841	27.1338	--
	45.851	27.2621	--
	45.867	27.9677	--
	45.911	27.4545	--
	45.921	26.4923	--
	45.946	27.7111	--
	45.956	28.1601	--
	45.974	28.2884	--
	45.984	28.4809	--
	46.015	28.8016	--
	46.055	29.6996	--
	46.065	29.5072	--
	46.087	29.6355	--
	46.097	30.2128	--
	46.125	30.2128	--
	46.135	29.8279	--
	46.155	29.6996	--
	46.165	30.0845	--
	46.222	29.5072	--
	46.232	29.0582	1.9231
	46.263	27.8394	1.91106
	46.273	28.545	1.92986
	46.289	28.9298	1.95612
	46.299	27.0055	1.91809
	46.331	28.8016	1.93836
	46.367	27.2621	1.93163
	46.377	27.1979	1.94616
	46.397	28.096	1.95018
	46.407	27.5187	1.93546
	46.461	26.2357	1.93795
	46.471	27.5187	1.9405
	46.489	26.4282	1.92317
	46.499	27.9035	1.94551
	46.541	27.9035	1.94443
	46.551	28.0318	1.95246
	46.576	29.0582	1.93498
	46.586	27.9035	1.95343
	46.645	29.8279	1.93816
	46.674	27.9677	1.95403
	46.684	27.3262	1.91674
	46.706	27.3262	1.91314
	46.718	27.6469	1.92908
	46.742	28.2884	1.9372
	46.772	28.1601	1.92844
	46.781	27.9035	1.94083
	46.819	26.4282	1.91561
	46.829	28.994	1.95383
	46.889	26.6847	1.9342
	46.918	26.6847	1.94968
	46.928	27.9035	1.94083
	46.949	27.0696	1.95578
	46.96	26.7489	1.93371
	46.974	27.0696	1.96622
	46.985	28.2884	1.95556
	47.019	27.1338	1.94881
	47.05	28.2884	1.91523
	47.059	27.5828	1.92813
	47.102	27.7753	1.91479
	47.111	27.7111	1.91347
	47.138	28.7374	1.93524
	47.147	28.7374	1.92192
	47.173	28.4809	1.93286
	47.191	28.2243	1.91067
	47.201	28.994	1.93114
	47.231	27.9677	1.91802
	47.263	28.4167	1.93767
	47.273	28.4167	1.91426
	47.308	28.096	1.93541
	47.318	28.1601	1.93133
	47.332	28.8657	1.93571
	47.342	27.9035	1.91886
	47.362	28.545	1.94534
	47.372	28.2884	1.94188
	47.415	28.1601	1.94393
	47.425	27.9035	1.94011
	47.448	29.2506	1.97422
	47.458	27.7111	1.95525
	47.525	27.5828	1.93965
	47.535	28.3526	1.95688
	47.556	27.3262	1.92178
	47.585	29.2506	1.94361
	47.595	29.0582	1.9357
	47.616	28.9298	1.92263
	47.627	28.8016	1.94772
	47.657	29.3147	1.92692
	47.667	29.0582	1.92742
	47.723	28.8657	1.92959
	47.733	29.1223	1.93594
	47.752	29.6996	1.95426
	47.762	28.7374	1.93272
	47.779	29.1864	1.94589
	47.789	28.096	1.93181
	47.809	28.4167	1.94271
	47.855	28.096	1.94658
	47.865	28.0318	1.94526
	47.904	27.5828	1.95694
	47.914	27.6469	1.9723
	47.955	27.7753	1.96701
	47.965	27.3904	1.95335
	47.991	27.7753	1.95476
	48.019	27.3904	1.95911
	48.029	27.7753	1.96413
	48.061	29.0582	1.95263
	48.071	28.2884	1.9426
	48.122	28.4167	1.94235
	48.132	28.2884	1.9534
	48.178	28.9298	1.94459
	48.188	29.0582	1.96307
	48.258	28.6091	1.96322
	48.268	28.2243	1.95857
	48.306	28.2884	1.95917
	48.34	27.3904	1.95227
	48.35	27.8394	1.95644
	48.398	27.7753	1.96413
	48.408	26.9413	1.96071
	48.434	28.3526	1.97057
	48.444	27.3904	1.95515
	48.477	27.1338	1.97222
	48.506	26.8772	1.96587
	48.528	27.9035	1.97864
	48.547	27.3262	1.97076
	48.564	28.0318	1.96795
	48.574	27.9035	1.9664
	48.599	28.0318	1.95606
	48.619	28.994	1.98228
	48.654	29.0582	1.96811
	48.664	29.1223	1.96511
	48.695	29.443	1.96124
	48.726	29.3789	1.9556
	48.736	29.3789	1.94948
	48.759	28.7374	1.96441
	48.769	29.2506	1.95441
	48.81	28.6733	1.96958
	48.82	28.4809	1.96419
	48.85	28.4167	1.96144
	48.893	28.4167	1.98521
	48.902	27.9677	1.97347
	48.929	27.1338	1.97474
	48.939	28.096	1.97863
	48.962	27.8394	2.00145
	48.972	28.1601	1.98967
	49.013	27.7753	1.99186
	49.023	27.7753	1.97961
	49.069	27.9035	1.98512
	49.079	27.9035	1.97792
	49.141	28.4809	1.9948
	49.157	28.8657	2.0081
	49.183	28.8657	1.98397
	49.194	28.8016	1.97149
	49.221	29.0582	1.97387
	49.23	30.1486	1.97571
	49.24	28.8657	1.97245
	49.27	28.8016	1.97653
	49.321	28.545	1.97595
	49.331	28.8016	1.99094
	49.384	27.2621	1.98817
	49.394	27.6469	1.99066
	49.413	28.1601	1.99111
	49.423	27.7111	1.99054
	49.442	28.8657	1.9955
	49.486	27.7111	2.00314
	49.496	27.6469	2.00111
	49.52	26.6206	2.00491
	49.53	27.7111	2.01503
	49.561	28.4809	1.99408
	49.571	28.2884	2.01102
	49.604	27.2621	1.99862
	49.614	27.8394	1.98705
	49.63	28.096	1.99735
	49.672	29.0582	2.01529
	49.695	28.4167	1.99601
	49.705	29.5713	2.01105
	49.727	29.0582	1.98936
	49.77	29.1864	1.99523
	49.779	28.545	1.97019
	49.822	29.3147	2.00002
	49.832	28.4167	2.00033
	49.855	28.8657	2.00306
	49.881	27.9035	1.99305
	49.901	29.9562	1.99229
	49.911	28.096	2.0096
	49.929	28.6091	2.01652
	49.939	28.545	2.01773
	49.985	29.9562	2.03047
	49.995	27.9035	2.0215
	50.028	27.3904	2.02141
	50.038	28.0318	2.03097
	50.054	27.4545	2.01121
	50.064	28.4167	2.0295
	50.094	28.4809	2.04774
	50.126	29.1864	2.03593
	50.135	26.8131	2.01317
	50.165	29.1864	2.02944
	50.175	30.0845	2.03382
	50.209	29.443	2.02714
	50.219	29.5072	2.0227
	50.233	31.4957	2.02063
	50.243	29.0582	2.00268
	50.276	29.3147	2.02523
	50.286	28.8657	2.00198
	50.309	29.1223	2.02633
	50.319	28.7374	2.02744
	50.349	28.9298	2.03066
	50.368	26.9413	2.02013
	50.378	28.545	2.02781
	50.399	28.2884	2.03515
	50.409	28.1601	2.0318
	50.45	27.1338	2.02407
	50.459	27.0055	2.01856
	50.476	27.6469	2.02128
	50.51	27.5828	2.05489
	50.52	27.9035	2.02546
	50.544	27.0696	2.05805
	50.572	27.5187	2.0579
	50.582	27.3904	2.05095
	50.614	27.3904	2.0369
	50.624	27.9677	2.05306
	50.657	29.6996	2.0641
	50.685	29.1864	2.05753
	50.694	28.6733	2.04053
	50.723	28.994	2.04242
	50.74	28.9298	2.03534
	50.75	29.1864	2.03557
	50.773	30.5977	2.04434
	50.824	29.6996	2.04033
	50.834	28.545	2.02241
	50.865	28.6091	2.04065
	50.897	28.6091	2.04821
	50.908	28.1601	2.02676
	50.927	28.8016	2.05828
	50.937	28.4167	2.05111
	50.983	27.2621	2.06956
	50.993	27.7111	2.06509
	51.051	27.7753	2.07144
	51.061	27.6469	2.05477
	51.118	28.545	2.07103
	51.128	28.2243	2.06805
	51.144	28.0318	2.08103
	51.154	28.1601	2.08078
	51.17	29.2506	2.08118
	51.18	28.6733	2.08734
	51.201	28.994	2.07051
	51.211	28.1601	2.06313
	51.267	29.6355	2.0671
	51.277	29.0582	2.07435
	51.31	28.6091	2.05686
	51.32	29.1864	2.05033
	51.337	29.1864	2.0759
	51.367	28.3526	2.06096
	51.376	28.4167	2.06407
	51.402	28.4167	2.07128
	51.441	27.2621	2.07604
	51.451	28.3526	2.08581
	51.509	28.2243	2.11306
	51.519	28.0318	2.10876
	51.553	27.3904	2.09488
	51.563	27.6469	2.09006
	51.58	27.6469	2.11671
	51.59	27.0055	2.09959
	51.607	27.6469	2.10374
	51.617	28.1601	2.09122
	51.652	28.545	2.1128
	51.678	28.545	2.10488
	51.687	28.8657	2.09921
	51.73	29.3789	2.10794
	51.74	29.2506	2.09198
	51.761	29.2506	2.10206
	51.771	29.1223	2.09295
	51.788	28.8016	2.08097
	51.797	29.0582	2.07723
	51.814	28.6733	2.07906
	51.824	28.096	2.08234
	51.869	28.1601	2.10095
	51.879	28.2243	2.0947
	51.928	28.3526	2.10381
	51.94	29.3789	2.11766
	51.96	28.2243	2.0929
	51.97	28.3526	2.11606
	51.985	28.0318	2.1174
	52.001	28.4809	2.11977
	52.01	27.9677	2.09448
	52.049	27.9035	2.09928
	52.1	27.6469	2.13399
	52.109	29.7638	2.13204
	52.157	28.8657	2.13378
	52.167	28.4167	2.12025
	52.187	28.096	2.11656
	52.216	29.0582	2.1082
	52.227	28.8016	2.10762
	52.246	29.3147	2.13687
	52.256	28.6091	2.117
	52.299	29.1223	2.11888
	52.309	29.6355	2.13049
	52.339	29.3789	2.13207
	52.349	29.3789	2.1173
	52.381	29.1864	2.11659
	52.415	28.8657	2.1237
	52.425	28.4167	2.12061
	52.441	27.9677	2.10708
	52.451	28.6733	2.1356
	52.493	27.6469	2.1376
	52.503	27.7111	2.12631
	52.552	28.0318	2.15089
	52.562	28.0318	2.13757
	52.6	27.5187	2.15585
	52.61	27.3904	2.1453
	52.63	28.1601	2.16145
	52.641	28.3526	2.15567
	52.659	27.9677	2.16002
	52.669	28.2243	2.15808
	52.7	27.9677	2.16326
	52.71	28.3526	2.14235
	52.769	28.0318	2.13577
	52.78	29.8279	2.16864
	52.82	29.5072	2.14082
	52.83	29.7638	2.13096
	52.85	29.7638	2.16013
	52.879	29.3789	2.17276
	52.888	30.0845	2.15338
	52.93	29.3789	2.16015
	52.94	30.726	2.15717
	52.959	29.1223	2.16894
	52.969	28.8657	2.16403
	53.001	28.545	2.17006
	53.043	28.0318	2.18042
	53.052	28.4809	2.17955
	53.084	28.4167	2.16815
	53.094	28.3526	2.1942
	53.129	27.3262	2.19584
	53.157	28.4809	2.19431
	53.167	28.4809	2.20512
	53.193	28.0318	2.18907
	53.232	28.2243	2.1624
	53.242	29.2506	2.19606
	53.288	28.8657	2.16187
	53.298	28.994	2.18215
	53.318	29.6996	2.18114
	53.329	29.6996	2.18906
	53.36	30.0845	2.19083
	53.388	29.6996	2.17682
	53.399	29.1223	2.18802
	53.434	29.1864	2.17746
	53.445	29.6996	2.20131
	53.463	28.994	2.18611
	53.473	28.4167	2.18688
	53.506	29.0582	2.17987
	53.535	28.9298	2.21217
	53.545	28.8657	2.20329
	53.578	28.2884	2.21702
[truncated: 73,367 more rows]

## Sheet: Figure 1D
	Figure 1D (top panel)				Figure 1D (bottom panel)
	Average, relative actin densities vs growth stress, n=15 actin networks form N=5 independent experiments				Growth velocity vs growth stress, n=12 actin networks form N=4 independent experiments
	growth stress[Pa]	relative fluorescence density [au]	SD relative fluorescence density [au]		growth stress[Pa]	growth velocity [um/min]	SD growth velocity [um/min]
	0	1	0		10.2041	6.31	1.03271
	25.5102	1.31219	0.18285		25.5102	5.69	0.85023
	51.0204	1.62979	0.2505		51.0204	4.73	0.79893
	102.041	2.20958	0.47361		102.041	3.4	0.74348
	255.102	3.80126	1.03279		153.061	2.51	0.54647
	510.204	5.97534	1.77023		255.102	1.75	0.41824
	765.306	7.9547	2.35277		382.653	1.385	0.35862
	1020.41	9.58352	2.80798		510.204	0.97	0.31806
	1275.51	11.2418	3.30968		637.755	0.82556	0.39869
					765.306	0.63667	0.32837
					1020.41	0.42	0.13719
	Average, relative CP densities vs growth stress, n=15 actin networks form N=5 independent experiments				1275.51	0.292	0.10304
	growth stress[Pa]	relative fluorescence density [au]	SD relative fluorescence density [au]
	0	1	0
	25.5102	1.23717	0.10623
	51.0204	1.43767	0.13992		Average, relative barbed end densities vs growth stress, n=21 actin networks form N=7 independent experiments
	102.041	1.82213	0.24552		growth stress[Pa]	relative barbed end density [au]	SD relative barbed end density [au]
	255.102	3.02662	0.63733		25.5102	1.24142	0.17253
	510.204	4.76843	1.11947		51.0204	1.45706	0.11956
	765.306	6.40754	1.57794		102.041	1.63834	0.27233
	1020.41	7.98593	2.17359		255.102	2.05337	0.40768
	1275.51	9.66589	2.76286		510.204	2.46901	0.23904
					765.306	2.98206	0.41675
					1020.41	3.31478	0.52284
	Average, relative Arp2/3 densities vs growth stress, n=15 actin networks form N=5 independent experiments
	growth stress[Pa]	relative fluorescence density [au]	SD relative fluorescence density [au]
	0	1	0
	25.5102	1.23077	0.125
	51.0204	1.49405	0.17337
	102.041	1.89538	0.26772
	255.102	3.33955	0.9913
	510.204	5.2509	1.85054
	765.306	6.96079	2.47598
	1020.41	8.60768	3.10448
	1275.51	10.26	3.90502
