# Supplementary material for: The molecular mechanism of load adaptation by branched actin networks
Source: eLife. 2022 Jun 24;11:e73145. doi: 10.7554/eLife.73145 (PMC9328761; doi:10.7554/eLife.73145)
Supplement: Figure 2—source data 1. [file elife-73145-fig2-data1.xlsx]

## Sheet: Figure 2A 
	Figure 2A
	Average, relative nucleation rate vs growth stress. Calculated from average Arp2/3 densities (Figure 1C, top) and growth velocities (Figure 1C, bottom) vs growth stress.
	growth stress[Pa]	relative nucleation rate [au]	SEM relative nucleation rate [au]
	25.5102	1	0
	51.0204	0.99222	0.02794
	102.041	0.93338	0.04175
	255.102	0.90443	0.04522
	510.204	0.79149	0.03505
	765.306	0.66369	0.02734
	1020.41	0.55441	0.02025
	Average, relative capping rate vs growth stress. Calculated from average CP densities (Figure 1C, top) and growth velocities (Figure 1C, bottom) vs growth stress.
	growth stress[Pa]	relative capping rate [au]	SEM relative capping rate [au]
	25.5102	1	0
	51.0204	0.95956	0.01667
	102.041	0.88601	0.03238
	255.102	0.80748	0.03527
	510.204	0.74483	0.03574
	765.306	0.64506	0.04571
	1020.41	0.54465	0.03608
	Average, relative polymerization rate vs growth stress. Calculated from average actin densities (Figure 1C, top) and growth velocities (Figure 1C, bottom) vs growth stress.
	growth stress[Pa]	relative polymerization rate [au]	SEM relative polymerization rate [au]
	25.5102	1	0
	51.0204	1.02471	0.01744
	102.041	1.00729	0.03767
	255.102	0.95288	0.04017
	510.204	0.87096	0.03949
	765.306	0.74429	0.04702
	1020.41	0.61419	0.03301

## Sheet: Figure 2B
	Figure 2B
	Average, relative capping rate per barbed end vs growth stress. Calculated from average CP densities (Figure 1D, top), growth velocities (Figure 1D, bottom) and average barbed end densities (Figure 1D, bottom) vs growth stress.
	growth stress[Pa]	relative per barbed end capping rate [au]	SEM relative per barbed end capping rate [au]
	25.5102	1	0
	51.0204	0.81755	0.08127
	102.041	0.67136	0.10159
	255.102	0.48818	0.0952
	510.204	0.3745	0.0687
	765.306	0.26854	0.08524
	1020.41	0.20398	0.08033
	Average, relative polymerization rate per barbed end vs growth stress. Calculated from average actin densities (Figure 1D, top), growth velocities (Figure 1D, bottom) and average barbed end densities (Figure 1D, bottom) vs growth stress.
	growth stress[Pa]	relative per barbed end polymerization rate [au]	SEM relative per barbed end polymerization rate [au]
	25.5102	1	0
	51.0204	0.87306	0.08119
	102.041	0.76325	0.10189
	255.102	0.57609	0.09452
	510.204	0.43792	0.06688
	765.306	0.30985	0.07896
	1020.41	0.23002	0.07039
	Double exponential fit to the average, relative polymerization rate per barbed end vs growth stress.			Double exponential fit to the average, relative capping rate per barbed end vs growth stress.
	growth stress[Pa]	relative per barbed end polymerization rate [au]		growth stress[Pa]	relative per barbed end capping rate [au]
	25.5102	0.99598		25.5102	0.99571
	26.5061	0.99068		26.5061	0.98754
	27.502	0.98546		27.502	0.97953
	28.4979	0.98032		28.4979	0.97167
	29.4938	0.97527		29.4938	0.96396
	30.4897	0.9703		30.4897	0.95641
	31.4856	0.96541		31.4856	0.949
	32.4815	0.96059		32.4815	0.94173
	33.4774	0.95586		33.4774	0.9346
	34.4733	0.95119		34.4733	0.92761
	35.4691	0.94661		35.4691	0.92075
	36.465	0.94209		36.465	0.91403
	37.4609	0.93765		37.4609	0.90743
	38.4568	0.93327		38.4568	0.90096
	39.4527	0.92896		39.4527	0.89461
	40.4486	0.92473		40.4486	0.88838
	41.4445	0.92055		41.4445	0.88227
	42.4404	0.91644		42.4404	0.87628
	43.4363	0.9124		43.4363	0.87039
	44.4322	0.90841		44.4322	0.86462
	45.4281	0.90449		45.4281	0.85896
	46.424	0.90062		46.424	0.8534
	47.4199	0.89682		47.4199	0.84795
	48.4158	0.89307		48.4158	0.8426
	49.4117	0.88938		49.4117	0.83734
	50.4076	0.88574		50.4076	0.83219
	51.4034	0.88216		51.4034	0.82713
	52.3993	0.87863		52.3993	0.82216
	53.3952	0.87515		53.3952	0.81728
	54.3911	0.87173		54.3911	0.8125
	55.387	0.86835		55.387	0.8078
	56.3829	0.86503		56.3829	0.80318
	57.3788	0.86175		57.3788	0.79865
	58.3747	0.85852		58.3747	0.79421
	59.3706	0.85533		59.3706	0.78984
	60.3665	0.85219		60.3665	0.78555
	61.3624	0.8491		61.3624	0.78134
	62.3583	0.84605		62.3583	0.7772
	63.3542	0.84304		63.3542	0.77313
	64.3501	0.84008		64.3501	0.76914
	65.346	0.83715		65.346	0.76522
	66.3418	0.83427		66.3418	0.76137
	67.3377	0.83143		67.3377	0.75759
	68.3336	0.82862		68.3336	0.75387
	69.3295	0.82586		69.3295	0.75021
	70.3254	0.82313		70.3254	0.74662
	71.3213	0.82044		71.3213	0.7431
	72.3172	0.81779		72.3172	0.73963
	73.3131	0.81517		73.3131	0.73622
	74.309	0.81258		74.309	0.73287
	75.3049	0.81003		75.3049	0.72958
	76.3008	0.80751		76.3008	0.72634
	77.2967	0.80503		77.2967	0.72316
	78.2926	0.80258		78.2926	0.72003
	79.2885	0.80016		79.2885	0.71696
	80.2844	0.79777		80.2844	0.71393
	81.2803	0.79541		81.2803	0.71096
	82.2762	0.79308		82.2762	0.70804
	83.272	0.79079		83.272	0.70516
	84.2679	0.78852		84.2679	0.70233
	85.2638	0.78627		85.2638	0.69954
	86.2597	0.78406		86.2597	0.69681
	87.2556	0.78187		87.2556	0.69411
	88.2515	0.77971		88.2515	0.69146
	89.2474	0.77758		89.2474	0.68885
	90.2433	0.77547		90.2433	0.68629
	91.2392	0.77339		91.2392	0.68376
	92.2351	0.77133		92.2351	0.68127
	93.231	0.7693		93.231	0.67883
	94.2269	0.76729		94.2269	0.67642
	95.2228	0.7653		95.2228	0.67404
	96.2187	0.76334		96.2187	0.67171
	97.2146	0.7614		97.2146	0.66941
	98.2105	0.75948		98.2105	0.66714
	99.2064	0.75758		99.2064	0.66491
	100.202	0.75571		100.202	0.66272
	101.198	0.75385		101.198	0.66055
	102.194	0.75202		102.194	0.65842
	103.19	0.75021		103.19	0.65632
	104.186	0.74841		104.186	0.65425
	105.182	0.74664		105.182	0.65221
	106.178	0.74488		106.178	0.6502
	107.174	0.74314		107.174	0.64822
	108.169	0.74143		108.169	0.64627
	109.165	0.73972		109.165	0.64435
	110.161	0.73804		110.161	0.64245
	111.157	0.73638		111.157	0.64058
	112.153	0.73473		112.153	0.63873
	113.149	0.7331		113.149	0.63692
	114.145	0.73148		114.145	0.63512
	115.141	0.72988		115.141	0.63335
	116.137	0.7283		116.137	0.63161
	117.132	0.72673		117.132	0.62989
	118.128	0.72518		118.128	0.62819
	119.124	0.72364		119.124	0.62651
	120.12	0.72212		120.12	0.62486
	121.116	0.72061		121.116	0.62323
	122.112	0.71912		122.112	0.62162
	123.108	0.71764		123.108	0.62003
	124.104	0.71617		124.104	0.61846
	125.1	0.71472		125.1	0.61691
	126.095	0.71328		126.095	0.61538
	127.091	0.71185		127.091	0.61386
	128.087	0.71044		128.087	0.61237
	129.083	0.70903		129.083	0.6109
	130.079	0.70764		130.079	0.60944
	131.075	0.70627		131.075	0.608
	132.071	0.7049		132.071	0.60658
	133.067	0.70355		133.067	0.60518
	134.063	0.70221		134.063	0.60379
	135.059	0.70087		135.059	0.60242
	136.054	0.69955		136.054	0.60106
	137.05	0.69824		137.05	0.59972
	138.046	0.69695		138.046	0.5984
	139.042	0.69566		139.042	0.59708
	140.038	0.69438		140.038	0.59579
	141.034	0.69311		141.034	0.59451
	142.03	0.69185		142.03	0.59324
	143.026	0.6906		143.026	0.59199
	144.022	0.68936		144.022	0.59075
	145.017	0.68813		145.017	0.58952
	146.013	0.68691		146.013	0.58831
	147.009	0.6857		147.009	0.5871
	148.005	0.6845		148.005	0.58592
	149.001	0.68331		149.001	0.58474
	149.997	0.68212		149.997	0.58357
	150.993	0.68094		150.993	0.58242
	151.989	0.67977		151.989	0.58128
	152.985	0.67861		152.985	0.58015
	153.981	0.67746		153.981	0.57903
	154.976	0.67632		154.976	0.57792
	155.972	0.67518		155.972	0.57682
	156.968	0.67405		156.968	0.57573
	157.964	0.67293		157.964	0.57466
	158.96	0.67181		158.96	0.57359
	159.956	0.67071		159.956	0.57253
	160.952	0.66961		160.952	0.57148
	161.948	0.66851		161.948	0.57044
	162.944	0.66743		162.944	0.56941
	163.939	0.66635		163.939	0.56839
	164.935	0.66528		164.935	0.56738
	165.931	0.66421		165.931	0.56638
	166.927	0.66315		166.927	0.56538
	167.923	0.6621		167.923	0.5644
	168.919	0.66105		168.919	0.56342
	169.915	0.66001		169.915	0.56245
	170.911	0.65897		170.911	0.56149
	171.907	0.65794		171.907	0.56053
	172.902	0.65692		172.902	0.55958
	173.898	0.6559		173.898	0.55864
	174.894	0.65489		174.894	0.55771
	175.89	0.65388		175.89	0.55679
	176.886	0.65288		176.886	0.55587
	177.882	0.65188		177.882	0.55495
	178.878	0.65089		178.878	0.55405
	179.874	0.6499		179.874	0.55315
	180.87	0.64892		180.87	0.55226
	181.866	0.64795		181.866	0.55137
	182.861	0.64698		182.861	0.55049
	183.857	0.64601		183.857	0.54962
	184.853	0.64505		184.853	0.54875
	185.849	0.64409		185.849	0.54789
	186.845	0.64314		186.845	0.54704
	187.841	0.64219		187.841	0.54619
	188.837	0.64125		188.837	0.54534
	189.833	0.64031		189.833	0.5445
	190.829	0.63938		190.829	0.54367
	191.824	0.63845		191.824	0.54284
	192.82	0.63752		192.82	0.54202
	193.816	0.6366		193.816	0.5412
	194.812	0.63568		194.812	0.54038
	195.808	0.63477		195.808	0.53958
	196.804	0.63386		196.804	0.53877
	197.8	0.63295		197.8	0.53797
	198.796	0.63205		198.796	0.53718
	199.792	0.63115		199.792	0.53639
	200.788	0.63026		200.788	0.5356
	201.783	0.62937		201.783	0.53482
	202.779	0.62848		202.779	0.53405
	203.775	0.6276		203.775	0.53327
	204.771	0.62672		204.771	0.5325
	205.767	0.62584		205.767	0.53174
	206.763	0.62497		206.763	0.53098
	207.759	0.6241		207.759	0.53022
	208.755	0.62323		208.755	0.52947
	209.751	0.62236		209.751	0.52872
	210.746	0.6215		210.746	0.52797
	211.742	0.62065		211.742	0.52723
	212.738	0.61979		212.738	0.5265
	213.734	0.61894		213.734	0.52576
	214.73	0.61809		214.73	0.52503
	215.726	0.61725		215.726	0.5243
	216.722	0.61641		216.722	0.52358
	217.718	0.61557		217.718	0.52286
	218.714	0.61473		218.714	0.52214
	219.71	0.6139		219.71	0.52142
	220.705	0.61307		220.705	0.52071
	221.701	0.61224		221.701	0.52
	222.697	0.61141		222.697	0.5193
	223.693	0.61059		223.693	0.51859
	224.689	0.60977		224.689	0.5179
	225.685	0.60895		225.685	0.5172
	226.681	0.60814		226.681	0.5165
	227.677	0.60733		227.677	0.51581
	228.673	0.60652		228.673	0.51512
	229.668	0.60571		229.668	0.51444
	230.664	0.6049		230.664	0.51376
	231.66	0.6041		231.66	0.51308
	232.656	0.6033		232.656	0.5124
	233.652	0.6025		233.652	0.51172
	234.648	0.60171		234.648	0.51105
	235.644	0.60092		235.644	0.51038
	236.64	0.60012		236.64	0.50971
	237.636	0.59934		237.636	0.50904
	238.631	0.59855		238.631	0.50838
	239.627	0.59777		239.627	0.50772
	240.623	0.59698		240.623	0.50706
	241.619	0.5962		241.619	0.5064
	242.615	0.59542		242.615	0.50575
	243.611	0.59465		243.611	0.5051
	244.607	0.59387		244.607	0.50445
	245.603	0.5931		245.603	0.5038
	246.599	0.59233		246.599	0.50315
	247.595	0.59157		247.595	0.50251
	248.59	0.5908		248.59	0.50187
	249.586	0.59004		249.586	0.50123
	250.582	0.58927		250.582	0.50059
	251.578	0.58851		251.578	0.49995
	252.574	0.58775		252.574	0.49932
	253.57	0.587		253.57	0.49868
	254.566	0.58624		254.566	0.49805
	255.562	0.58549		255.562	0.49742
	256.558	0.58474		256.558	0.4968
	257.553	0.58399		257.553	0.49617
	258.549	0.58324		258.549	0.49555
	259.545	0.5825		259.545	0.49493
	260.541	0.58175		260.541	0.49431
	261.537	0.58101		261.537	0.49369
	262.533	0.58027		262.533	0.49307
	263.529	0.57953		263.529	0.49246
	264.525	0.57879		264.525	0.49184
	265.521	0.57806		265.521	0.49123
	266.517	0.57732		266.517	0.49062
	267.512	0.57659		267.512	0.49001
	268.508	0.57586		268.508	0.4894
	269.504	0.57513		269.504	0.4888
	270.5	0.5744		270.5	0.48819
	271.496	0.57367		271.496	0.48759
	272.492	0.57295		272.492	0.48699
	273.488	0.57223		273.488	0.48639
	274.484	0.5715		274.484	0.48579
	275.48	0.57078		275.48	0.48519
	276.475	0.57006		276.475	0.48459
	277.471	0.56935		277.471	0.484
	278.467	0.56863		278.467	0.48341
	279.463	0.56792		279.463	0.48281
	280.459	0.5672		280.459	0.48222
	281.455	0.56649		281.455	0.48163
	282.451	0.56578		282.451	0.48105
	283.447	0.56507		283.447	0.48046
	284.443	0.56436		284.443	0.47987
	285.438	0.56366		285.438	0.47929
	286.434	0.56295		286.434	0.47871
	287.43	0.56225		287.43	0.47813
	288.426	0.56155		288.426	0.47754
	289.422	0.56084		289.422	0.47697
	290.418	0.56014		290.418	0.47639
	291.414	0.55945		291.414	0.47581
	292.41	0.55875		292.41	0.47523
	293.406	0.55805		293.406	0.47466
	294.402	0.55736		294.402	0.47409
	295.397	0.55666		295.397	0.47351
	296.393	0.55597		296.393	0.47294
	297.389	0.55528		297.389	0.47237
	298.385	0.55459		298.385	0.4718
	299.381	0.5539		299.381	0.47123
	300.377	0.55321		300.377	0.47067
	301.373	0.55253		301.373	0.4701
	302.369	0.55184		302.369	0.46954
	303.365	0.55116		303.365	0.46897
	304.36	0.55048		304.36	0.46841
	305.356	0.54979		305.356	0.46785
	306.352	0.54911		306.352	0.46729
	307.348	0.54844		307.348	0.46673
	308.344	0.54776		308.344	0.46617
	309.34	0.54708		309.34	0.46561
	310.336	0.5464		310.336	0.46505
	311.332	0.54573		311.332	0.4645
	312.328	0.54506		312.328	0.46394
	313.324	0.54438		313.324	0.46339
	314.319	0.54371		314.319	0.46283
	315.315	0.54304		315.315	0.46228
	316.311	0.54237		316.311	0.46173
	317.307	0.5417		317.307	0.46118
	318.303	0.54104		318.303	0.46063
	319.299	0.54037		319.299	0.46008
	320.295	0.53971		320.295	0.45954
	321.291	0.53904		321.291	0.45899
	322.287	0.53838		322.287	0.45844
	323.282	0.53772		323.282	0.4579
	324.278	0.53706		324.278	0.45735
	325.274	0.5364		325.274	0.45681
	326.27	0.53574		326.27	0.45627
	327.266	0.53508		327.266	0.45573
	328.262	0.53442		328.262	0.45519
	329.258	0.53377		329.258	0.45465
	330.254	0.53311		330.254	0.45411
	331.25	0.53246		331.25	0.45357
	332.246	0.5318		332.246	0.45303
	333.241	0.53115		333.241	0.4525
	334.237	0.5305		334.237	0.45196
	335.233	0.52985		335.233	0.45143
	336.229	0.5292		336.229	0.45089
	337.225	0.52855		337.225	0.45036
	338.221	0.52791		338.221	0.44983
	339.217	0.52726		339.217	0.44929
	340.213	0.52662		340.213	0.44876
	341.209	0.52597		341.209	0.44823
	342.204	0.52533		342.204	0.4477
	343.2	0.52469		343.2	0.44718
	344.196	0.52404		344.196	0.44665
	345.192	0.5234		345.192	0.44612
	346.188	0.52276		346.188	0.4456
	347.184	0.52213		347.184	0.44507
	348.18	0.52149		348.18	0.44455
	349.176	0.52085		349.176	0.44402
	350.172	0.52022		350.172	0.4435
	351.167	0.51958		351.167	0.44298
	352.163	0.51895		352.163	0.44245
	353.159	0.51831		353.159	0.44193
	354.155	0.51768		354.155	0.44141
	355.151	0.51705		355.151	0.44089
	356.147	0.51642		356.147	0.44038
	357.143	0.51579		357.143	0.43986
	358.139	0.51516		358.139	0.43934
	359.135	0.51453		359.135	0.43882
	360.131	0.51391		360.131	0.43831
	361.126	0.51328		361.126	0.43779
	362.122	0.51265		362.122	0.43728
	363.118	0.51203		363.118	0.43676
	364.114	0.51141		364.114	0.43625
	365.11	0.51078		365.11	0.43574
	366.106	0.51016		366.106	0.43523
	367.102	0.50954		367.102	0.43472
	368.098	0.50892		368.098	0.43421
	369.094	0.5083		369.094	0.4337
	370.089	0.50768		370.089	0.43319
	371.085	0.50706		371.085	0.43268
	372.081	0.50645		372.081	0.43217
	373.077	0.50583		373.077	0.43167
	374.073	0.50522		374.073	0.43116
	375.069	0.5046		375.069	0.43065
	376.065	0.50399		376.065	0.43015
	377.061	0.50338		377.061	0.42965
	378.057	0.50276		378.057	0.42914
	379.053	0.50215		379.053	0.42864
	380.048	0.50154		380.048	0.42814
	381.044	0.50093		381.044	0.42764
	382.04	0.50033		382.04	0.42713
	383.036	0.49972		383.036	0.42663
	384.032	0.49911		384.032	0.42613
	385.028	0.4985		385.028	0.42564
	386.024	0.4979		386.024	0.42514
	387.02	0.49729		387.02	0.42464
	388.016	0.49669		388.016	0.42414
	389.011	0.49609		389.011	0.42365
	390.007	0.49549		390.007	0.42315
	391.003	0.49488		391.003	0.42266
	391.999	0.49428		391.999	0.42216
	392.995	0.49368		392.995	0.42167
	393.991	0.49308		393.991	0.42117
	394.987	0.49249		394.987	0.42068
	395.983	0.49189		395.983	0.42019
	396.979	0.49129		396.979	0.4197
	397.975	0.4907		397.975	0.41921
	398.97	0.4901		398.97	0.41872
	399.966	0.48951		399.966	0.41823
	400.962	0.48891		400.962	0.41774
	401.958	0.48832		401.958	0.41725
	402.954	0.48773		402.954	0.41676
	403.95	0.48714		403.95	0.41628
	404.946	0.48655		404.946	0.41579
	405.942	0.48596		405.942	0.4153
	406.938	0.48537		406.938	0.41482
	407.933	0.48478		407.933	0.41433
	408.929	0.48419		408.929	0.41385
	409.925	0.4836		409.925	0.41337
	410.921	0.48302		410.921	0.41288
	411.917	0.48243		411.917	0.4124
	412.913	0.48185		412.913	0.41192
	413.909	0.48126		413.909	0.41144
	414.905	0.48068		414.905	0.41096
	415.901	0.4801		415.901	0.41048
	416.896	0.47952		416.896	0.41
	417.892	0.47894		417.892	0.40952
	418.888	0.47836		418.888	0.40904
	419.884	0.47778		419.884	0.40857
	420.88	0.4772		420.88	0.40809
	421.876	0.47662		421.876	0.40761
	422.872	0.47604		422.872	0.40714
	423.868	0.47547		423.868	0.40666
	424.864	0.47489		424.864	0.40619
	425.86	0.47432		425.86	0.40571
	426.855	0.47374		426.855	0.40524
	427.851	0.47317		427.851	0.40477
	428.847	0.47259		428.847	0.4043
	429.843	0.47202		429.843	0.40382
	430.839	0.47145		430.839	0.40335
	431.835	0.47088		431.835	0.40288
	432.831	0.47031		432.831	0.40241
	433.827	0.46974		433.827	0.40194
	434.823	0.46917		434.823	0.40147
	435.818	0.46861		435.818	0.40101
	436.814	0.46804		436.814	0.40054
	437.81	0.46747		437.81	0.40007
	438.806	0.46691		438.806	0.3996
	439.802	0.46634		439.802	0.39914
	440.798	0.46578		440.798	0.39867
	441.794	0.46521		441.794	0.39821
	442.79	0.46465		442.79	0.39774
	443.786	0.46409		443.786	0.39728
	444.782	0.46353		444.782	0.39682
	445.777	0.46297		445.777	0.39635
	446.773	0.46241		446.773	0.39589
	447.769	0.46185		447.769	0.39543
	448.765	0.46129		448.765	0.39497
	449.761	0.46073		449.761	0.39451
	450.757	0.46017		450.757	0.39405
	451.753	0.45962		451.753	0.39359
	452.749	0.45906		452.749	0.39313
	453.745	0.4585		453.745	0.39267
	454.74	0.45795		454.74	0.39222
	455.736	0.4574		455.736	0.39176
	456.732	0.45684		456.732	0.3913
	457.728	0.45629		457.728	0.39085
	458.724	0.45574		458.724	0.39039
	459.72	0.45519		459.72	0.38994
	460.716	0.45464		460.716	0.38948
	461.712	0.45409		461.712	0.38903
	462.708	0.45354		462.708	0.38857
	463.704	0.45299		463.704	0.38812
	464.699	0.45244		464.699	0.38767
	465.695	0.4519		465.695	0.38722
	466.691	0.45135		466.691	0.38677
	467.687	0.4508		467.687	0.38632
	468.683	0.45026		468.683	0.38587
	469.679	0.44971		469.679	0.38542
	470.675	0.44917		470.675	0.38497
	471.671	0.44863		471.671	0.38452
	472.667	0.44808		472.667	0.38407
	473.662	0.44754		473.662	0.38362
	474.658	0.447		474.658	0.38318
	475.654	0.44646		475.654	0.38273
	476.65	0.44592		476.65	0.38228
	477.646	0.44538		477.646	0.38184
	478.642	0.44484		478.642	0.38139
	479.638	0.44431		479.638	0.38095
	480.634	0.44377		480.634	0.38051
	481.63	0.44323		481.63	0.38006
	482.625	0.4427		482.625	0.37962
	483.621	0.44216		483.621	0.37918
	484.617	0.44163		484.617	0.37874
	485.613	0.44109		485.613	0.3783
	486.609	0.44056		486.609	0.37786
	487.605	0.44003		487.605	0.37742
	488.601	0.4395		488.601	0.37698
	489.597	0.43897		489.597	0.37654
	490.593	0.43844		490.593	0.3761
	491.589	0.43791		491.589	0.37566
	492.584	0.43738		492.584	0.37522
	493.58	0.43685		493.58	0.37479
	494.576	0.43632		494.576	0.37435
	495.572	0.43579		495.572	0.37391
	496.568	0.43527		496.568	0.37348
	497.564	0.43474		497.564	0.37304
	498.56	0.43421		498.56	0.37261
	499.556	0.43369		499.556	0.37217
	500.552	0.43317		500.552	0.37174
	501.547	0.43264		501.547	0.37131
	502.543	0.43212		502.543	0.37088
	503.539	0.4316		503.539	0.37044
	504.535	0.43108		504.535	0.37001
	505.531	0.43056		505.531	0.36958
	506.527	0.43004		506.527	0.36915
	507.523	0.42952		507.523	0.36872
	508.519	0.429		508.519	0.36829
	509.515	0.42848		509.515	0.36786
	510.511	0.42796		510.511	0.36744
	511.506	0.42744		511.506	0.36701
	512.502	0.42693		512.502	0.36658
	513.498	0.42641		513.498	0.36615
	514.494	0.4259		514.494	0.36573
	515.49	0.42538		515.49	0.3653
	516.486	0.42487		516.486	0.36488
	517.482	0.42435		517.482	0.36445
	518.478	0.42384		518.478	0.36403
	519.474	0.42333		519.474	0.3636
	520.469	0.42282		520.469	0.36318
	521.465	0.42231		521.465	0.36276
	522.461	0.4218		522.461	0.36233
	523.457	0.42129		523.457	0.36191
	524.453	0.42078		524.453	0.36149
	525.449	0.42027		525.449	0.36107
	526.445	0.41976		526.445	0.36065
	527.441	0.41926		527.441	0.36023
	528.437	0.41875		528.437	0.35981
	529.432	0.41824		529.432	0.35939
	530.428	0.41774		530.428	0.35897
	531.424	0.41723		531.424	0.35856
	532.42	0.41673		532.42	0.35814
	533.416	0.41623		533.416	0.35772
	534.412	0.41572		534.412	0.35731
	535.408	0.41522		535.408	0.35689
	536.404	0.41472		536.404	0.35647
	537.4	0.41422		537.4	0.35606
	538.396	0.41372		538.396	0.35564
	539.391	0.41322		539.391	0.35523
	540.387	0.41272		540.387	0.35482
	541.383	0.41222		541.383	0.3544
	542.379	0.41172		542.379	0.35399
	543.375	0.41123		543.375	0.35358
	544.371	0.41073		544.371	0.35317
	545.367	0.41023		545.367	0.35276
	546.363	0.40974		546.363	0.35235
	547.359	0.40924		547.359	0.35194
	548.354	0.40875		548.354	0.35153
	549.35	0.40825		549.35	0.35112
	550.346	0.40776		550.346	0.35071
	551.342	0.40727		551.342	0.3503
	552.338	0.40678		552.338	0.34989
	553.334	0.40629		553.334	0.34949
	554.33	0.40579		554.33	0.34908
	555.326	0.4053		555.326	0.34867
	556.322	0.40482		556.322	0.34827
	557.318	0.40433		557.318	0.34786
	558.313	0.40384		558.313	0.34746
	559.309	0.40335		559.309	0.34705
	560.305	0.40286		560.305	0.34665
	561.301	0.40238		561.301	0.34624
	562.297	0.40189		562.297	0.34584
	563.293	0.40141		563.293	0.34544
	564.289	0.40092		564.289	0.34504
	565.285	0.40044		565.285	0.34463
	566.281	0.39995		566.281	0.34423
	567.276	0.39947		567.276	0.34383
	568.272	0.39899		568.272	0.34343
	569.268	0.39851		569.268	0.34303
	570.264	0.39802		570.264	0.34263
	571.26	0.39754		571.26	0.34224
	572.256	0.39706		572.256	0.34184
	573.252	0.39658		573.252	0.34144
	574.248	0.3961		574.248	0.34104
	575.244	0.39563		575.244	0.34064
	576.24	0.39515		576.24	0.34025
	577.235	0.39467		577.235	0.33985
	578.231	0.39419		578.231	0.33946
	579.227	0.39372		579.227	0.33906
	580.223	0.39324		580.223	0.33867
	581.219	0.39277		581.219	0.33827
	582.215	0.39229		582.215	0.33788
	583.211	0.39182		583.211	0.33749
	584.207	0.39135		584.207	0.33709
	585.203	0.39087		585.203	0.3367
	586.198	0.3904		586.198	0.33631
	587.194	0.38993		587.194	0.33592
	588.19	0.38946		588.19	0.33553
	589.186	0.38899		589.186	0.33514
	590.182	0.38852		590.182	0.33475
	591.178	0.38805		591.178	0.33436
	592.174	0.38758		592.174	0.33397
	593.17	0.38711		593.17	0.33358
	594.166	0.38665		594.166	0.33319
	595.161	0.38618		595.161	0.3328
	596.157	0.38571		596.157	0.33241
	597.153	0.38525		597.153	0.33203
	598.149	0.38478		598.149	0.33164
	599.145	0.38432		599.145	0.33126
	600.141	0.38385		600.141	0.33087
	601.137	0.38339		601.137	0.33048
	602.133	0.38293		602.133	0.3301
	603.129	0.38246		603.129	0.32972
	604.125	0.382		604.125	0.32933
	605.12	0.38154		605.12	0.32895
	606.116	0.38108		606.116	0.32857
	607.112	0.38062		607.112	0.32818
	608.108	0.38016		608.108	0.3278
	609.104	0.3797		609.104	0.32742
	610.1	0.37924		610.1	0.32704
	611.096	0.37878		611.096	0.32666
	612.092	0.37833		612.092	0.32628
	613.088	0.37787		613.088	0.3259
	614.083	0.37741		614.083	0.32552
	615.079	0.37696		615.079	0.32514
	616.075	0.3765		616.075	0.32476
	617.071	0.37605		617.071	0.32438
	618.067	0.37559		618.067	0.32401
	619.063	0.37514		619.063	0.32363
	620.059	0.37469		620.059	0.32325
	621.055	0.37424		621.055	0.32288
	622.051	0.37378		622.051	0.3225
	623.047	0.37333		623.047	0.32213
	624.042	0.37288		624.042	0.32175
	625.038	0.37243		625.038	0.32138
	626.034	0.37198		626.034	0.321
	627.03	0.37153		627.03	0.32063
	628.026	0.37108		628.026	0.32026
	629.022	0.37063		629.022	0.31988
	630.018	0.37019		630.018	0.31951
	631.014	0.36974		631.014	0.31914
	632.01	0.36929		632.01	0.31877
	633.005	0.36885		633.005	0.3184
	634.001	0.3684		634.001	0.31803
	634.997	0.36796		634.997	0.31766
	635.993	0.36751		635.993	0.31729
	636.989	0.36707		636.989	0.31692
	637.985	0.36663		637.985	0.31655
	638.981	0.36618		638.981	0.31618
	639.977	0.36574		639.977	0.31581
	640.973	0.3653		640.973	0.31544
	641.968	0.36486		641.968	0.31508
	642.964	0.36442		642.964	0.31471
	643.96	0.36398		643.96	0.31434
	644.956	0.36354		644.956	0.31398
	645.952	0.3631		645.952	0.31361
	646.948	0.36266		646.948	0.31325
	647.944	0.36222		647.944	0.31288
	648.94	0.36179		648.94	0.31252
	649.936	0.36135		649.936	0.31216
	650.932	0.36091		650.932	0.31179
	651.927	0.36048		651.927	0.31143
	652.923	0.36004		652.923	0.31107
	653.919	0.35961		653.919	0.3107
	654.915	0.35917		654.915	0.31034
	655.911	0.35874		655.911	0.30998
	656.907	0.35831		656.907	0.30962
	657.903	0.35787		657.903	0.30926
	658.899	0.35744		658.899	0.3089
	659.895	0.35701		659.895	0.30854
	660.89	0.35658		660.89	0.30818
	661.886	0.35615		661.886	0.30782
	662.882	0.35572		662.882	0.30747
	663.878	0.35529		663.878	0.30711
	664.874	0.35486		664.874	0.30675
	665.87	0.35443		665.87	0.30639
	666.866	0.354		666.866	0.30604
	667.862	0.35357		667.862	0.30568
	668.858	0.35315		668.858	0.30532
	669.854	0.35272		669.854	0.30497
	670.849	0.35229		670.849	0.30461
	671.845	0.35187		671.845	0.30426
	672.841	0.35144		672.841	0.30391
	673.837	0.35102		673.837	0.30355
	674.833	0.3506		674.833	0.3032
	675.829	0.35017		675.829	0.30285
	676.825	0.34975		676.825	0.30249
	677.821	0.34933		677.821	0.30214
	678.817	0.34891		678.817	0.30179
	679.812	0.34848		679.812	0.30144
	680.808	0.34806		680.808	0.30109
	681.804	0.34764		681.804	0.30074
	682.8	0.34722		682.8	0.30039
	683.796	0.3468		683.796	0.30004
	684.792	0.34639		684.792	0.29969
	685.788	0.34597		685.788	0.29934
	686.784	0.34555		686.784	0.29899
	687.78	0.34513		687.78	0.29864
	688.776	0.34472		688.776	0.2983
	689.771	0.3443		689.771	0.29795
	690.767	0.34388		690.767	0.2976
	691.763	0.34347		691.763	0.29726
	692.759	0.34305		692.759	0.29691
	693.755	0.34264		693.755	0.29656
	694.751	0.34223		694.751	0.29622
	695.747	0.34181		695.747	0.29587
	696.743	0.3414		696.743	0.29553
	697.739	0.34099		697.739	0.29519
	698.734	0.34058		698.734	0.29484
	699.73	0.34016		699.73	0.2945
	700.726	0.33975		700.726	0.29416
	701.722	0.33934		701.722	0.29381
	702.718	0.33893		702.718	0.29347
	703.714	0.33852		703.714	0.29313
	704.71	0.33812		704.71	0.29279
	705.706	0.33771		705.706	0.29245
	706.702	0.3373		706.702	0.29211
	707.697	0.33689		707.697	0.29177
	708.693	0.33649		708.693	0.29143
	709.689	0.33608		709.689	0.29109
	710.685	0.33567		710.685	0.29075
	711.681	0.33527		711.681	0.29041
	712.677	0.33486		712.677	0.29007
	713.673	0.33446		713.673	0.28974
	714.669	0.33405		714.669	0.2894
	715.665	0.33365		715.665	0.28906
	716.661	0.33325		716.661	0.28873
	717.656	0.33285		717.656	0.28839
	718.652	0.33244		718.652	0.28806
	719.648	0.33204		719.648	0.28772
	720.644	0.33164		720.644	0.28739
	721.64	0.33124		721.64	0.28705
	722.636	0.33084		722.636	0.28672
	723.632	0.33044		723.632	0.28638
	724.628	0.33004		724.628	0.28605
	725.624	0.32964		725.624	0.28572
	726.619	0.32925		726.619	0.28538
	727.615	0.32885		727.615	0.28505
	728.611	0.32845		728.611	0.28472
	729.607	0.32805		729.607	0.28439
	730.603	0.32766		730.603	0.28406
	731.599	0.32726		731.599	0.28373
	732.595	0.32687		732.595	0.2834
	733.591	0.32647		733.591	0.28307
	734.587	0.32608		734.587	0.28274
	735.583	0.32569		735.583	0.28241
	736.578	0.32529		736.578	0.28208
	737.574	0.3249		737.574	0.28175
	738.57	0.32451		738.57	0.28142
	739.566	0.32412		739.566	0.2811
	740.562	0.32372		740.562	0.28077
	741.558	0.32333		741.558	0.28044
	742.554	0.32294		742.554	0.28012
	743.55	0.32255		743.55	0.27979
	744.546	0.32216		744.546	0.27946
	745.541	0.32177		745.541	0.27914
	746.537	0.32139		746.537	0.27881
	747.533	0.321		747.533	0.27849
	748.529	0.32061		748.529	0.27817
	749.525	0.32022		749.525	0.27784
	750.521	0.31984		750.521	0.27752
	751.517	0.31945		751.517	0.2772
	752.513	0.31906		752.513	0.27687
	753.509	0.31868		753.509	0.27655
	754.505	0.31829		754.505	0.27623
	755.5	0.31791		755.5	0.27591
	756.496	0.31753		756.496	0.27559
	757.492	0.31714		757.492	0.27527
	758.488	0.31676		758.488	0.27495
	759.484	0.31638		759.484	0.27463
	760.48	0.31599		760.48	0.27431
	761.476	0.31561		761.476	0.27399
	762.472	0.31523		762.472	0.27367
	763.468	0.31485		763.468	0.27335
	764.463	0.31447		764.463	0.27303
	765.459	0.31409		765.459	0.27271
	766.455	0.31371		766.455	0.2724
	767.451	0.31333		767.451	0.27208
	768.447	0.31296		768.447	0.27176
	769.443	0.31258		769.443	0.27145
	770.439	0.3122		770.439	0.27113
	771.435	0.31182		771.435	0.27081
	772.431	0.31145		772.431	0.2705
	773.426	0.31107		773.426	0.27019
	774.422	0.31069		774.422	0.26987
	775.418	0.31032		775.418	0.26956
	776.414	0.30994		776.414	0.26924
	777.41	0.30957		777.41	0.26893
	778.406	0.3092		778.406	0.26862
	779.402	0.30882		779.402	0.2683
	780.398	0.30845		780.398	0.26799
	781.394	0.30808		781.394	0.26768
	782.39	0.30771		782.39	0.26737
	783.385	0.30733		783.385	0.26706
	784.381	0.30696		784.381	0.26675
	785.377	0.30659		785.377	0.26644
	786.373	0.30622		786.373	0.26613
	787.369	0.30585		787.369	0.26582
	788.365	0.30548		788.365	0.26551
	789.361	0.30511		789.361	0.2652
	790.357	0.30475		790.357	0.26489
	791.353	0.30438		791.353	0.26458
	792.348	0.30401		792.348	0.26427
	793.344	0.30364		793.344	0.26397
	794.34	0.30328		794.34	0.26366
	795.336	0.30291		795.336	0.26335
	796.332	0.30254		796.332	0.26304
	797.328	0.30218		797.328	0.26274
	798.324	0.30181		798.324	0.26243
	799.32	0.30145		799.32	0.26213
	800.316	0.30109		800.316	0.26182
	801.312	0.30072		801.312	0.26152
	802.307	0.30036		802.307	0.26121
	803.303	0.3		803.303	0.26091
	804.299	0.29963		804.299	0.26061
	805.295	0.29927		805.295	0.2603
	806.291	0.29891		806.291	0.26
	807.287	0.29855		807.287	0.2597
	808.283	0.29819		808.283	0.25939
	809.279	0.29783		809.279	0.25909
	810.275	0.29747		810.275	0.25879
	811.27	0.29711		811.27	0.25849
	812.266	0.29675		812.266	0.25819
	813.262	0.29639		813.262	0.25789
	814.258	0.29604		814.258	0.25759
	815.254	0.29568		815.254	0.25729
	816.25	0.29532		816.25	0.25699
	817.246	0.29496		817.246	0.25669
	818.242	0.29461		818.242	0.25639
	819.238	0.29425		819.238	0.25609
	820.234	0.2939		820.234	0.2558
	821.229	0.29354		821.229	0.2555
	822.225	0.29319		822.225	0.2552
	823.221	0.29283		823.221	0.2549
	824.217	0.29248		824.217	0.25461
	825.213	0.29213		825.213	0.25431
	826.209	0.29177		826.209	0.25401
	827.205	0.29142		827.205	0.25372
	828.201	0.29107		828.201	0.25342
	829.197	0.29072		829.197	0.25313
	830.192	0.29037		830.192	0.25283
	831.188	0.29002		831.188	0.25254
	832.184	0.28967		832.184	0.25225
	833.18	0.28932		833.18	0.25195
	834.176	0.28897		834.176	0.25166
	835.172	0.28862		835.172	0.25137
	836.168	0.28827		836.168	0.25107
	837.164	0.28792		837.164	0.25078
	838.16	0.28757		838.16	0.25049
	839.155	0.28723		839.155	0.2502
	840.151	0.28688		840.151	0.24991
	841.147	0.28653		841.147	0.24962
	842.143	0.28619		842.143	0.24933
	843.139	0.28584		843.139	0.24904
	844.135	0.2855		844.135	0.24875
	845.131	0.28515		845.131	0.24846
	846.127	0.28481		846.127	0.24817
	847.123	0.28446		847.123	0.24788
	848.119	0.28412		848.119	0.24759
	849.114	0.28378		849.114	0.2473
	850.11	0.28344		850.11	0.24701
	851.106	0.28309		851.106	0.24673
	852.102	0.28275		852.102	0.24644
	853.098	0.28241		853.098	0.24615
	854.094	0.28207		854.094	0.24587
	855.09	0.28173		855.09	0.24558
	856.086	0.28139		856.086	0.24529
	857.082	0.28105		857.082	0.24501
	858.077	0.28071		858.077	0.24472
	859.073	0.28037		859.073	0.24444
	860.069	0.28003		860.069	0.24415
	861.065	0.27969		861.065	0.24387
	862.061	0.27936		862.061	0.24359
	863.057	0.27902		863.057	0.2433
	864.053	0.27868		864.053	0.24302
	865.049	0.27834		865.049	0.24274
	866.045	0.27801		866.045	0.24245
	867.041	0.27767		867.041	0.24217
	868.036	0.27734		868.036	0.24189
	869.032	0.277		869.032	0.24161
	870.028	0.27667		870.028	0.24133
	871.024	0.27633		871.024	0.24105
	872.02	0.276		872.02	0.24077
	873.016	0.27567		873.016	0.24049
	874.012	0.27533		874.012	0.24021
	875.008	0.275		875.008	0.23993
	876.004	0.27467		876.004	0.23965
	876.999	0.27434		876.999	0.23937
	877.995	0.27401		877.995	0.23909
	878.991	0.27368		878.991	0.23881
	879.987	0.27335		879.987	0.23853
	880.983	0.27302		880.983	0.23826
	881.979	0.27269		881.979	0.23798
	882.975	0.27236		882.975	0.2377
	883.971	0.27203		883.971	0.23743
	884.967	0.2717		884.967	0.23715
	885.962	0.27137		885.962	0.23687
	886.958	0.27104		886.958	0.2366
	887.954	0.27072		887.954	0.23632
	888.95	0.27039		888.95	0.23605
	889.946	0.27006		889.946	0.23577
	890.942	0.26974		890.942	0.2355
	891.938	0.26941		891.938	0.23522
	892.934	0.26909		892.934	0.23495
	893.93	0.26876		893.93	0.23468
	894.926	0.26844		894.926	0.2344
	895.921	0.26811		895.921	0.23413
	896.917	0.26779		896.917	0.23386
	897.913	0.26746		897.913	0.23359
	898.909	0.26714		898.909	0.23331
	899.905	0.26682		899.905	0.23304
	900.901	0.2665		900.901	0.23277
	901.897	0.26618		901.897	0.2325
	902.893	0.26585		902.893	0.23223
	903.889	0.26553		903.889	0.23196
	904.884	0.26521		904.884	0.23169
	905.88	0.26489		905.88	0.23142
	906.876	0.26457		906.876	0.23115
	907.872	0.26425		907.872	0.23088
	908.868	0.26393		908.868	0.23061
	909.864	0.26361		909.864	0.23034
	910.86	0.2633		910.86	0.23008
	911.856	0.26298		911.856	0.22981
	912.852	0.26266		912.852	0.22954
	913.848	0.26234		913.848	0.22927
	914.843	0.26203		914.843	0.22901
	915.839	0.26171		915.839	0.22874
	916.835	0.26139		916.835	0.22847
	917.831	0.26108		917.831	0.22821
	918.827	0.26076		918.827	0.22794
	919.823	0.26045		919.823	0.22768
	920.819	0.26013		920.819	0.22741
	921.815	0.25982		921.815	0.22715
	922.811	0.25951		922.811	0.22688
	923.806	0.25919		923.806	0.22662
	924.802	0.25888		924.802	0.22636
	925.798	0.25857		925.798	0.22609
	926.794	0.25826		926.794	0.22583
	927.79	0.25794		927.79	0.22557
	928.786	0.25763		928.786	0.2253
	929.782	0.25732		929.782	0.22504
	930.778	0.25701		930.778	0.22478
	931.774	0.2567		931.774	0.22452
	932.769	0.25639		932.769	0.22426
	933.765	0.25608		933.765	0.224
	934.761	0.25577		934.761	0.22374
	935.757	0.25546		935.757	0.22348
	936.753	0.25515		936.753	0.22322
	937.749	0.25485		937.749	0.22296
	938.745	0.25454		938.745	0.2227
	939.741	0.25423		939.741	0.22244
	940.737	0.25392		940.737	0.22218
	941.733	0.25362		941.733	0.22192
	942.728	0.25331		942.728	0.22166
	943.724	0.253		943.724	0.2214
	944.72	0.2527		944.72	0.22115
	945.716	0.25239		945.716	0.22089
	946.712	0.25209		946.712	0.22063
	947.708	0.25178		947.708	0.22037
	948.704	0.25148		948.704	0.22012
	949.7	0.25118		949.7	0.21986
	950.696	0.25087		950.696	0.21961
	951.691	0.25057		951.691	0.21935
	952.687	0.25027		952.687	0.2191
	953.683	0.24997		953.683	0.21884
	954.679	0.24966		954.679	0.21859
	955.675	0.24936		955.675	0.21833
	956.671	0.24906		956.671	0.21808
	957.667	0.24876		957.667	0.21782
	958.663	0.24846		958.663	0.21757
	959.659	0.24816		959.659	0.21732
	960.655	0.24786		960.655	0.21706
	961.65	0.24756		961.65	0.21681
	962.646	0.24726		962.646	0.21656
	963.642	0.24696		963.642	0.21631
	964.638	0.24667		964.638	0.21605
	965.634	0.24637		965.634	0.2158
	966.63	0.24607		966.63	0.21555
	967.626	0.24577		967.626	0.2153
	968.622	0.24548		968.622	0.21505
	969.618	0.24518		969.618	0.2148
	970.613	0.24488		970.613	0.21455
	971.609	0.24459		971.609	0.2143
	972.605	0.24429		972.605	0.21405
	973.601	0.244		973.601	0.2138
	974.597	0.2437		974.597	0.21355
	975.593	0.24341		975.593	0.21331
	976.589	0.24312		976.589	0.21306
	977.585	0.24282		977.585	0.21281
	978.581	0.24253		978.581	0.21256
	979.577	0.24224		979.577	0.21231
	980.572	0.24194		980.572	0.21207
	981.568	0.24165		981.568	0.21182
	982.564	0.24136		982.564	0.21157
	983.56	0.24107		983.56	0.21133
	984.556	0.24078		984.556	0.21108
	985.552	0.24049		985.552	0.21084
	986.548	0.2402		986.548	0.21059
	987.544	0.23991		987.544	0.21035
	988.54	0.23962		988.54	0.2101
	989.535	0.23933		989.535	0.20986
	990.531	0.23904		990.531	0.20961
	991.527	0.23875		991.527	0.20937
	992.523	0.23846		992.523	0.20912
	993.519	0.23817		993.519	0.20888
	994.515	0.23789		994.515	0.20864
	995.511	0.2376		995.511	0.20839
	996.507	0.23731		996.507	0.20815
	997.503	0.23702		997.503	0.20791
	998.499	0.23674		998.499	0.20767
	999.494	0.23645		999.494	0.20743
	1000.49	0.23617		1000.49	0.20718
	1001.49	0.23588		1001.49	0.20694
	1002.48	0.2356		1002.48	0.2067
	1003.48	0.23531		1003.48	0.20646
	1004.47	0.23503		1004.47	0.20622
	1005.47	0.23474		1005.47	0.20598
	1006.47	0.23446		1006.47	0.20574
	1007.46	0.23418		1007.46	0.2055
	1008.46	0.2339		1008.46	0.20526
	1009.45	0.23361		1009.45	0.20503
	1010.45	0.23333		1010.45	0.20479
	1011.45	0.23305		1011.45	0.20455
	1012.44	0.23277		1012.44	0.20431
	1013.44	0.23249		1013.44	0.20407
	1014.43	0.23221		1014.43	0.20383
	1015.43	0.23193		1015.43	0.2036
	1016.42	0.23165		1016.42	0.20336
	1017.42	0.23137		1017.42	0.20312
	1018.42	0.23109		1018.42	0.20289
	1019.41	0.23081		1019.41	0.20265
	1020.41	0.23053		1020.41	0.20242

## Sheet: Figure 2C
	Figure 2C
	Average, relative capping rate per barbed end vs force per growing filament end.
	force per growing filament [pN]	relative per barbed end capping rate [au]	SEM relative per barbed end capping rate [au]
	0.12843	1	0
	0.21535	0.81755	0.08127
	0.38927	0.67136	0.10159
	0.77647	0.48818	0.0952
	1.29152	0.3745	0.0687
	1.60398	0.26854	0.08524
	1.92397	0.20398	0.08033
	Average, relative polymerization rate per barbed end vs force per growing filament end.
	force per growing filament [pN]	relative per barbed polymerization rate [au]	SEM relative per barbed polymerization rate [au]
	0.12843	1	0
	0.21535	0.87306	0.08119
	0.38927	0.76325	0.10189
	0.77647	0.57609	0.09452
	1.29152	0.43792	0.06688
	1.60398	0.30985	0.07896
	1.92397	0.23002	0.07039
	Monoexponential fit to the average, relative capping rate per barbed end vs force per growing filament			Monoexponential fit to the average, relative polymerization rate per barbed end vs force per growing filament
	force per growing filament [pN]	relative per barbed end capping rate [au]		force per growing filament [pN]	relative per barbed end polymerization rate [au]
	0.12843	0.92045		0.12843	0.96092
	0.13023	0.919		0.13023	0.9596
	0.13203	0.91756		0.13203	0.95829
	0.13382	0.91612		0.13382	0.95698
	0.13562	0.91468		0.13562	0.95567
	0.13742	0.91324		0.13742	0.95437
	0.13922	0.91181		0.13922	0.95306
	0.14101	0.91038		0.14101	0.95176
	0.14281	0.90895		0.14281	0.95046
	0.14461	0.90752		0.14461	0.94916
	0.14641	0.9061		0.14641	0.94786
	0.1482	0.90468		0.1482	0.94657
	0.15	0.90326		0.15	0.94527
	0.1518	0.90184		0.1518	0.94398
	0.1536	0.90042		0.1536	0.94269
	0.15539	0.89901		0.15539	0.9414
	0.15719	0.8976		0.15719	0.94011
	0.15899	0.89619		0.15899	0.93883
	0.16078	0.89478		0.16078	0.93755
	0.16258	0.89338		0.16258	0.93626
	0.16438	0.89198		0.16438	0.93499
	0.16618	0.89058		0.16618	0.93371
	0.16797	0.88918		0.16797	0.93243
	0.16977	0.88778		0.16977	0.93116
	0.17157	0.88639		0.17157	0.92988
	0.17337	0.885		0.17337	0.92861
	0.17516	0.88361		0.17516	0.92734
	0.17696	0.88222		0.17696	0.92608
	0.17876	0.88084		0.17876	0.92481
	0.18056	0.87945		0.18056	0.92355
	0.18235	0.87807		0.18235	0.92228
	0.18415	0.87669		0.18415	0.92102
	0.18595	0.87532		0.18595	0.91976
	0.18774	0.87394		0.18774	0.91851
	0.18954	0.87257		0.18954	0.91725
	0.19134	0.8712		0.19134	0.916
	0.19314	0.86983		0.19314	0.91475
	0.19493	0.86847		0.19493	0.91349
	0.19673	0.86711		0.19673	0.91225
	0.19853	0.86574		0.19853	0.911
	0.20033	0.86439		0.20033	0.90975
	0.20212	0.86303		0.20212	0.90851
	0.20392	0.86167		0.20392	0.90727
	0.20572	0.86032		0.20572	0.90603
	0.20752	0.85897		0.20752	0.90479
	0.20931	0.85762		0.20931	0.90355
	0.21111	0.85628		0.21111	0.90232
	0.21291	0.85493		0.21291	0.90108
	0.2147	0.85359		0.2147	0.89985
	0.2165	0.85225		0.2165	0.89862
	0.2183	0.85091		0.2183	0.89739
	0.2201	0.84958		0.2201	0.89617
	0.22189	0.84824		0.22189	0.89494
	0.22369	0.84691		0.22369	0.89372
	0.22549	0.84558		0.22549	0.8925
	0.22729	0.84425		0.22729	0.89128
	0.22908	0.84293		0.22908	0.89006
	0.23088	0.84161		0.23088	0.88884
	0.23268	0.84028		0.23268	0.88763
	0.23448	0.83897		0.23448	0.88642
	0.23627	0.83765		0.23627	0.8852
	0.23807	0.83633		0.23807	0.88399
	0.23987	0.83502		0.23987	0.88279
	0.24166	0.83371		0.24166	0.88158
	0.24346	0.8324		0.24346	0.88037
	0.24526	0.83109		0.24526	0.87917
	0.24706	0.82979		0.24706	0.87797
	0.24885	0.82849		0.24885	0.87677
	0.25065	0.82719		0.25065	0.87557
	0.25245	0.82589		0.25245	0.87437
	0.25425	0.82459		0.25425	0.87318
	0.25604	0.8233		0.25604	0.87198
	0.25784	0.82201		0.25784	0.87079
	0.25964	0.82071		0.25964	0.8696
	0.26144	0.81943		0.26144	0.86841
	0.26323	0.81814		0.26323	0.86723
	0.26503	0.81686		0.26503	0.86604
	0.26683	0.81557		0.26683	0.86486
	0.26862	0.81429		0.26862	0.86368
	0.27042	0.81302		0.27042	0.86249
	0.27222	0.81174		0.27222	0.86132
	0.27402	0.81046		0.27402	0.86014
	0.27581	0.80919		0.27581	0.85896
	0.27761	0.80792		0.27761	0.85779
	0.27941	0.80665		0.27941	0.85662
	0.28121	0.80539		0.28121	0.85544
	0.283	0.80412		0.283	0.85428
	0.2848	0.80286		0.2848	0.85311
	0.2866	0.8016		0.2866	0.85194
	0.2884	0.80034		0.2884	0.85078
	0.29019	0.79909		0.29019	0.84961
	0.29199	0.79783		0.29199	0.84845
	0.29379	0.79658		0.29379	0.84729
	0.29559	0.79533		0.29559	0.84614
	0.29738	0.79408		0.29738	0.84498
	0.29918	0.79283		0.29918	0.84382
	0.30098	0.79159		0.30098	0.84267
	0.30277	0.79035		0.30277	0.84152
	0.30457	0.78911		0.30457	0.84037
	0.30637	0.78787		0.30637	0.83922
	0.30817	0.78663		0.30817	0.83807
	0.30996	0.7854		0.30996	0.83693
	0.31176	0.78416		0.31176	0.83578
	0.31356	0.78293		0.31356	0.83464
	0.31536	0.7817		0.31536	0.8335
	0.31715	0.78048		0.31715	0.83236
	0.31895	0.77925		0.31895	0.83122
	0.32075	0.77803		0.32075	0.83009
	0.32255	0.77681		0.32255	0.82895
	0.32434	0.77559		0.32434	0.82782
	0.32614	0.77437		0.32614	0.82669
	0.32794	0.77315		0.32794	0.82556
	0.32973	0.77194		0.32973	0.82443
	0.33153	0.77073		0.33153	0.8233
	0.33333	0.76952		0.33333	0.82218
	0.33513	0.76831		0.33513	0.82105
	0.33692	0.7671		0.33692	0.81993
	0.33872	0.7659		0.33872	0.81881
	0.34052	0.7647		0.34052	0.81769
	0.34232	0.7635		0.34232	0.81657
	0.34411	0.7623		0.34411	0.81546
	0.34591	0.7611		0.34591	0.81434
	0.34771	0.75991		0.34771	0.81323
	0.34951	0.75872		0.34951	0.81212
	0.3513	0.75752		0.3513	0.81101
	0.3531	0.75633		0.3531	0.8099
	0.3549	0.75515		0.3549	0.80879
	0.35669	0.75396		0.35669	0.80769
	0.35849	0.75278		0.35849	0.80658
	0.36029	0.7516		0.36029	0.80548
	0.36209	0.75042		0.36209	0.80438
	0.36388	0.74924		0.36388	0.80328
	0.36568	0.74806		0.36568	0.80218
	0.36748	0.74689		0.36748	0.80108
	0.36928	0.74572		0.36928	0.79999
	0.37107	0.74455		0.37107	0.7989
	0.37287	0.74338		0.37287	0.7978
	0.37467	0.74221		0.37467	0.79671
	0.37647	0.74105		0.37647	0.79562
	0.37826	0.73988		0.37826	0.79454
	0.38006	0.73872		0.38006	0.79345
	0.38186	0.73756		0.38186	0.79237
	0.38365	0.7364		0.38365	0.79128
	0.38545	0.73525		0.38545	0.7902
	0.38725	0.73409		0.38725	0.78912
	0.38905	0.73294		0.38905	0.78804
	0.39084	0.73179		0.39084	0.78697
	0.39264	0.73064		0.39264	0.78589
	0.39444	0.72949		0.39444	0.78482
	0.39624	0.72835		0.39624	0.78374
	0.39803	0.72721		0.39803	0.78267
	0.39983	0.72606		0.39983	0.7816
	0.40163	0.72492		0.40163	0.78053
	0.40343	0.72379		0.40343	0.77947
	0.40522	0.72265		0.40522	0.7784
	0.40702	0.72152		0.40702	0.77734
	0.40882	0.72038		0.40882	0.77627
	0.41061	0.71925		0.41061	0.77521
	0.41241	0.71812		0.41241	0.77415
	0.41421	0.717		0.41421	0.7731
	0.41601	0.71587		0.41601	0.77204
	0.4178	0.71475		0.4178	0.77098
	0.4196	0.71363		0.4196	0.76993
	0.4214	0.7125		0.4214	0.76888
	0.4232	0.71139		0.4232	0.76783
	0.42499	0.71027		0.42499	0.76678
	0.42679	0.70915		0.42679	0.76573
	0.42859	0.70804		0.42859	0.76468
	0.43039	0.70693		0.43039	0.76364
	0.43218	0.70582		0.43218	0.76259
	0.43398	0.70471		0.43398	0.76155
	0.43578	0.70361		0.43578	0.76051
	0.43757	0.7025		0.43757	0.75947
	0.43937	0.7014		0.43937	0.75843
	0.44117	0.7003		0.44117	0.7574
	0.44297	0.6992		0.44297	0.75636
	0.44476	0.6981		0.44476	0.75533
	0.44656	0.69701		0.44656	0.75429
	0.44836	0.69591		0.44836	0.75326
	0.45016	0.69482		0.45016	0.75223
	0.45195	0.69373		0.45195	0.7512
	0.45375	0.69264		0.45375	0.75018
	0.45555	0.69155		0.45555	0.74915
	0.45735	0.69047		0.45735	0.74813
	0.45914	0.68938		0.45914	0.74711
	0.46094	0.6883		0.46094	0.74608
	0.46274	0.68722		0.46274	0.74506
	0.46453	0.68614		0.46453	0.74405
	0.46633	0.68506		0.46633	0.74303
	0.46813	0.68399		0.46813	0.74201
	0.46993	0.68291		0.46993	0.741
	0.47172	0.68184		0.47172	0.73999
	0.47352	0.68077		0.47352	0.73898
	0.47532	0.6797		0.47532	0.73797
	0.47712	0.67864		0.47712	0.73696
	0.47891	0.67757		0.47891	0.73595
	0.48071	0.67651		0.48071	0.73494
	0.48251	0.67545		0.48251	0.73394
	0.48431	0.67439		0.48431	0.73294
	0.4861	0.67333		0.4861	0.73193
	0.4879	0.67227		0.4879	0.73093
	0.4897	0.67121		0.4897	0.72993
	0.4915	0.67016		0.4915	0.72894
	0.49329	0.66911		0.49329	0.72794
	0.49509	0.66806		0.49509	0.72694
	0.49689	0.66701		0.49689	0.72595
	0.49868	0.66596		0.49868	0.72496
	0.50048	0.66492		0.50048	0.72397
	0.50228	0.66387		0.50228	0.72298
	0.50408	0.66283		0.50408	0.72199
	0.50587	0.66179		0.50587	0.721
	0.50767	0.66075		0.50767	0.72002
	0.50947	0.65972		0.50947	0.71903
	0.51127	0.65868		0.51127	0.71805
	0.51306	0.65765		0.51306	0.71707
	0.51486	0.65661		0.51486	0.71609
	0.51666	0.65558		0.51666	0.71511
	0.51846	0.65455		0.51846	0.71413
	0.52025	0.65353		0.52025	0.71316
	0.52205	0.6525		0.52205	0.71218
	0.52385	0.65148		0.52385	0.71121
	0.52564	0.65045		0.52564	0.71024
	0.52744	0.64943		0.52744	0.70927
	0.52924	0.64841		0.52924	0.7083
	0.53104	0.64739		0.53104	0.70733
	0.53283	0.64638		0.53283	0.70636
	0.53463	0.64536		0.53463	0.7054
	0.53643	0.64435		0.53643	0.70443
	0.53823	0.64334		0.53823	0.70347
	0.54002	0.64233		0.54002	0.70251
	0.54182	0.64132		0.54182	0.70155
	0.54362	0.64031		0.54362	0.70059
	0.54542	0.63931		0.54542	0.69963
	0.54721	0.63831		0.54721	0.69867
	0.54901	0.6373		0.54901	0.69772
	0.55081	0.6363		0.55081	0.69676
	0.5526	0.6353		0.5526	0.69581
	0.5544	0.63431		0.5544	0.69486
	0.5562	0.63331		0.5562	0.69391
	0.558	0.63232		0.558	0.69296
	0.55979	0.63132		0.55979	0.69202
	0.56159	0.63033		0.56159	0.69107
	0.56339	0.62934		0.56339	0.69013
	0.56519	0.62836		0.56519	0.68918
	0.56698	0.62737		0.56698	0.68824
	0.56878	0.62639		0.56878	0.6873
	0.57058	0.6254		0.57058	0.68636
	0.57238	0.62442		0.57238	0.68542
	0.57417	0.62344		0.57417	0.68448
	0.57597	0.62246		0.57597	0.68355
	0.57777	0.62148		0.57777	0.68261
	0.57956	0.62051		0.57956	0.68168
	0.58136	0.61953		0.58136	0.68075
	0.58316	0.61856		0.58316	0.67982
	0.58496	0.61759		0.58496	0.67889
	0.58675	0.61662		0.58675	0.67796
	0.58855	0.61565		0.58855	0.67704
	0.59035	0.61469		0.59035	0.67611
	0.59215	0.61372		0.59215	0.67519
	0.59394	0.61276		0.59394	0.67426
	0.59574	0.6118		0.59574	0.67334
	0.59754	0.61084		0.59754	0.67242
	0.59934	0.60988		0.59934	0.6715
	0.60113	0.60892		0.60113	0.67058
	0.60293	0.60796		0.60293	0.66967
	0.60473	0.60701		0.60473	0.66875
	0.60652	0.60606		0.60652	0.66784
	0.60832	0.60511		0.60832	0.66692
	0.61012	0.60416		0.61012	0.66601
	0.61192	0.60321		0.61192	0.6651
	0.61371	0.60226		0.61371	0.66419
	0.61551	0.60132		0.61551	0.66329
	0.61731	0.60037		0.61731	0.66238
	0.61911	0.59943		0.61911	0.66147
	0.6209	0.59849		0.6209	0.66057
	0.6227	0.59755		0.6227	0.65967
	0.6245	0.59661		0.6245	0.65876
	0.6263	0.59567		0.6263	0.65786
	0.62809	0.59474		0.62809	0.65697
	0.62989	0.59381		0.62989	0.65607
	0.63169	0.59287		0.63169	0.65517
	0.63348	0.59194		0.63348	0.65427
	0.63528	0.59101		0.63528	0.65338
	0.63708	0.59009		0.63708	0.65249
	0.63888	0.58916		0.63888	0.6516
	0.64067	0.58823		0.64067	0.6507
	0.64247	0.58731		0.64247	0.64982
	0.64427	0.58639		0.64427	0.64893
	0.64607	0.58547		0.64607	0.64804
	0.64786	0.58455		0.64786	0.64715
	0.64966	0.58363		0.64966	0.64627
	0.65146	0.58272		0.65146	0.64539
	0.65326	0.5818		0.65326	0.6445
	0.65505	0.58089		0.65505	0.64362
	0.65685	0.57998		0.65685	0.64274
	0.65865	0.57907		0.65865	0.64187
	0.66044	0.57816		0.66044	0.64099
	0.66224	0.57725		0.66224	0.64011
	0.66404	0.57634		0.66404	0.63924
	0.66584	0.57544		0.66584	0.63836
	0.66763	0.57453		0.66763	0.63749
	0.66943	0.57363		0.66943	0.63662
	0.67123	0.57273		0.67123	0.63575
	0.67303	0.57183		0.67303	0.63488
	0.67482	0.57094		0.67482	0.63401
	0.67662	0.57004		0.67662	0.63315
	0.67842	0.56914		0.67842	0.63228
	0.68022	0.56825		0.68022	0.63142
	0.68201	0.56736		0.68201	0.63055
	0.68381	0.56647		0.68381	0.62969
	0.68561	0.56558		0.68561	0.62883
	0.6874	0.56469		0.6874	0.62797
	0.6892	0.56381		0.6892	0.62711
	0.691	0.56292		0.691	0.62625
	0.6928	0.56204		0.6928	0.6254
	0.69459	0.56115		0.69459	0.62454
	0.69639	0.56027		0.69639	0.62369
	0.69819	0.55939		0.69819	0.62284
	0.69999	0.55852		0.69999	0.62199
	0.70178	0.55764		0.70178	0.62114
	0.70358	0.55676		0.70358	0.62029
	0.70538	0.55589		0.70538	0.61944
	0.70718	0.55502		0.70718	0.61859
	0.70897	0.55415		0.70897	0.61775
	0.71077	0.55328		0.71077	0.6169
	0.71257	0.55241		0.71257	0.61606
	0.71437	0.55154		0.71437	0.61522
	0.71616	0.55067		0.71616	0.61438
	0.71796	0.54981		0.71796	0.61354
	0.71976	0.54895		0.71976	0.6127
	0.72155	0.54809		0.72155	0.61186
	0.72335	0.54723		0.72335	0.61102
	0.72515	0.54637		0.72515	0.61019
	0.72695	0.54551		0.72695	0.60935
	0.72874	0.54465		0.72874	0.60852
	0.73054	0.5438		0.73054	0.60769
	0.73234	0.54294		0.73234	0.60686
	0.73414	0.54209		0.73414	0.60603
	0.73593	0.54124		0.73593	0.6052
	0.73773	0.54039		0.73773	0.60437
	0.73953	0.53954		0.73953	0.60355
	0.74133	0.5387		0.74133	0.60272
	0.74312	0.53785		0.74312	0.6019
	0.74492	0.53701		0.74492	0.60108
	0.74672	0.53616		0.74672	0.60025
	0.74851	0.53532		0.74851	0.59943
	0.75031	0.53448		0.75031	0.59862
	0.75211	0.53364		0.75211	0.5978
	0.75391	0.5328		0.75391	0.59698
	0.7557	0.53197		0.7557	0.59616
	0.7575	0.53113		0.7575	0.59535
	0.7593	0.5303		0.7593	0.59454
	0.7611	0.52947		0.7611	0.59372
	0.76289	0.52864		0.76289	0.59291
	0.76469	0.52781		0.76469	0.5921
	0.76649	0.52698		0.76649	0.59129
	0.76829	0.52615		0.76829	0.59048
	0.77008	0.52532		0.77008	0.58968
	0.77188	0.5245		0.77188	0.58887
	0.77368	0.52368		0.77368	0.58806
	0.77547	0.52285		0.77547	0.58726
	0.77727	0.52203		0.77727	0.58646
	0.77907	0.52121		0.77907	0.58566
	0.78087	0.5204		0.78087	0.58486
	0.78266	0.51958		0.78266	0.58406
	0.78446	0.51876		0.78446	0.58326
	0.78626	0.51795		0.78626	0.58246
	0.78806	0.51714		0.78806	0.58166
	0.78985	0.51632		0.78985	0.58087
	0.79165	0.51551		0.79165	0.58008
	0.79345	0.5147		0.79345	0.57928
	0.79525	0.5139		0.79525	0.57849
	0.79704	0.51309		0.79704	0.5777
	0.79884	0.51228		0.79884	0.57691
	0.80064	0.51148		0.80064	0.57612
	0.80243	0.51068		0.80243	0.57533
	0.80423	0.50987		0.80423	0.57455
	0.80603	0.50907		0.80603	0.57376
	0.80783	0.50828		0.80783	0.57298
	0.80962	0.50748		0.80962	0.5722
	0.81142	0.50668		0.81142	0.57141
	0.81322	0.50589		0.81322	0.57063
	0.81502	0.50509		0.81502	0.56985
	0.81681	0.5043		0.81681	0.56907
	0.81861	0.50351		0.81861	0.5683
	0.82041	0.50272		0.82041	0.56752
	0.82221	0.50193		0.82221	0.56674
	0.824	0.50114		0.824	0.56597
	0.8258	0.50035		0.8258	0.56519
	0.8276	0.49957		0.8276	0.56442
	0.82939	0.49878		0.82939	0.56365
	0.83119	0.498		0.83119	0.56288
	0.83299	0.49722		0.83299	0.56211
	0.83479	0.49644		0.83479	0.56134
	0.83658	0.49566		0.83658	0.56058
	0.83838	0.49488		0.83838	0.55981
	0.84018	0.4941		0.84018	0.55904
	0.84198	0.49333		0.84198	0.55828
	0.84377	0.49255		0.84377	0.55752
	0.84557	0.49178		0.84557	0.55675
	0.84737	0.49101		0.84737	0.55599
	0.84917	0.49024		0.84917	0.55523
	0.85096	0.48947		0.85096	0.55447
	0.85276	0.4887		0.85276	0.55372
	0.85456	0.48793		0.85456	0.55296
	0.85635	0.48717		0.85635	0.5522
	0.85815	0.4864		0.85815	0.55145
	0.85995	0.48564		0.85995	0.5507
	0.86175	0.48488		0.86175	0.54994
	0.86354	0.48412		0.86354	0.54919
	0.86534	0.48336		0.86534	0.54844
	0.86714	0.4826		0.86714	0.54769
	0.86894	0.48184		0.86894	0.54694
	0.87073	0.48108		0.87073	0.54619
	0.87253	0.48033		0.87253	0.54545
	0.87433	0.47957		0.87433	0.5447
	0.87613	0.47882		0.87613	0.54396
	0.87792	0.47807		0.87792	0.54321
	0.87972	0.47732		0.87972	0.54247
	0.88152	0.47657		0.88152	0.54173
	0.88331	0.47582		0.88331	0.54099
	0.88511	0.47507		0.88511	0.54025
	0.88691	0.47433		0.88691	0.53951
	0.88871	0.47358		0.88871	0.53877
	0.8905	0.47284		0.8905	0.53804
	0.8923	0.4721		0.8923	0.5373
	0.8941	0.47136		0.8941	0.53657
	0.8959	0.47062		0.8959	0.53583
	0.89769	0.46988		0.89769	0.5351
	0.89949	0.46914		0.89949	0.53437
	0.90129	0.4684		0.90129	0.53364
	0.90309	0.46767		0.90309	0.53291
	0.90488	0.46693		0.90488	0.53218
	0.90668	0.4662		0.90668	0.53145
	0.90848	0.46547		0.90848	0.53073
	0.91027	0.46474		0.91027	0.53
	0.91207	0.46401		0.91207	0.52928
	0.91387	0.46328		0.91387	0.52855
	0.91567	0.46255		0.91567	0.52783
	0.91746	0.46183		0.91746	0.52711
	0.91926	0.4611		0.91926	0.52639
	0.92106	0.46038		0.92106	0.52567
	0.92286	0.45966		0.92286	0.52495
	0.92465	0.45894		0.92465	0.52423
	0.92645	0.45821		0.92645	0.52352
	0.92825	0.4575		0.92825	0.5228
	0.93005	0.45678		0.93005	0.52209
	0.93184	0.45606		0.93184	0.52137
	0.93364	0.45534		0.93364	0.52066
	0.93544	0.45463		0.93544	0.51995
	0.93724	0.45392		0.93724	0.51924
	0.93903	0.4532		0.93903	0.51853
	0.94083	0.45249		0.94083	0.51782
	0.94263	0.45178		0.94263	0.51711
	0.94442	0.45107		0.94442	0.51641
	0.94622	0.45036		0.94622	0.5157
	0.94802	0.44966		0.94802	0.515
	0.94982	0.44895		0.94982	0.51429
	0.95161	0.44825		0.95161	0.51359
	0.95341	0.44754		0.95341	0.51289
	0.95521	0.44684		0.95521	0.51219
	0.95701	0.44614		0.95701	0.51149
	0.9588	0.44544		0.9588	0.51079
	0.9606	0.44474		0.9606	0.51009
	0.9624	0.44404		0.9624	0.50939
	0.9642	0.44334		0.9642	0.50869
	0.96599	0.44265		0.96599	0.508
	0.96779	0.44195		0.96779	0.5073
	0.96959	0.44126		0.96959	0.50661
	0.97138	0.44057		0.97138	0.50592
	0.97318	0.43988		0.97318	0.50523
	0.97498	0.43919		0.97498	0.50454
	0.97678	0.4385		0.97678	0.50385
	0.97857	0.43781		0.97857	0.50316
	0.98037	0.43712		0.98037	0.50247
	0.98217	0.43643		0.98217	0.50178
	0.98397	0.43575		0.98397	0.5011
	0.98576	0.43506		0.98576	0.50041
	0.98756	0.43438		0.98756	0.49973
	0.98936	0.4337		0.98936	0.49905
	0.99116	0.43302		0.99116	0.49836
	0.99295	0.43234		0.99295	0.49768
	0.99475	0.43166		0.99475	0.497
	0.99655	0.43098		0.99655	0.49632
	0.99834	0.43031		0.99834	0.49564
	1.00014	0.42963		1.00014	0.49497
	1.00194	0.42896		1.00194	0.49429
	1.00374	0.42828		1.00374	0.49361
	1.00553	0.42761		1.00553	0.49294
	1.00733	0.42694		1.00733	0.49227
	1.00913	0.42627		1.00913	0.49159
	1.01093	0.4256		1.01093	0.49092
	1.01272	0.42493		1.01272	0.49025
	1.01452	0.42427		1.01452	0.48958
	1.01632	0.4236		1.01632	0.48891
	1.01812	0.42293		1.01812	0.48824
	1.01991	0.42227		1.01991	0.48758
	1.02171	0.42161		1.02171	0.48691
	1.02351	0.42095		1.02351	0.48624
	1.0253	0.42029		1.0253	0.48558
	1.0271	0.41963		1.0271	0.48491
	1.0289	0.41897		1.0289	0.48425
	1.0307	0.41831		1.0307	0.48359
	1.03249	0.41765		1.03249	0.48293
	1.03429	0.417		1.03429	0.48227
	1.03609	0.41634		1.03609	0.48161
	1.03789	0.41569		1.03789	0.48095
	1.03968	0.41504		1.03968	0.48029
	1.04148	0.41438		1.04148	0.47964
	1.04328	0.41373		1.04328	0.47898
	1.04508	0.41308		1.04508	0.47833
	1.04687	0.41244		1.04687	0.47767
	1.04867	0.41179		1.04867	0.47702
	1.05047	0.41114		1.05047	0.47637
	1.05226	0.4105		1.05226	0.47572
	1.05406	0.40985		1.05406	0.47507
	1.05586	0.40921		1.05586	0.47442
	1.05766	0.40857		1.05766	0.47377
	1.05945	0.40793		1.05945	0.47312
	1.06125	0.40729		1.06125	0.47247
	1.06305	0.40665		1.06305	0.47183
	1.06485	0.40601		1.06485	0.47118
	1.06664	0.40537		1.06664	0.47054
	1.06844	0.40473		1.06844	0.4699
	1.07024	0.4041		1.07024	0.46925
	1.07204	0.40346		1.07204	0.46861
	1.07383	0.40283		1.07383	0.46797
	1.07563	0.4022		1.07563	0.46733
	1.07743	0.40157		1.07743	0.46669
	1.07922	0.40094		1.07922	0.46606
	1.08102	0.40031		1.08102	0.46542
	1.08282	0.39968		1.08282	0.46478
	1.08462	0.39905		1.08462	0.46415
	1.08641	0.39843		1.08641	0.46351
	1.08821	0.3978		1.08821	0.46288
	1.09001	0.39718		1.09001	0.46225
	1.09181	0.39655		1.09181	0.46162
	1.0936	0.39593		1.0936	0.46098
	1.0954	0.39531		1.0954	0.46035
	1.0972	0.39469		1.0972	0.45972
	1.099	0.39407		1.099	0.4591
	1.10079	0.39345		1.10079	0.45847
	1.10259	0.39283		1.10259	0.45784
	1.10439	0.39221		1.10439	0.45722
	1.10618	0.3916		1.10618	0.45659
	1.10798	0.39098		1.10798	0.45597
	1.10978	0.39037		1.10978	0.45534
	1.11158	0.38976		1.11158	0.45472
	1.11337	0.38915		1.11337	0.4541
	1.11517	0.38854		1.11517	0.45348
	1.11697	0.38793		1.11697	0.45286
	1.11877	0.38732		1.11877	0.45224
	1.12056	0.38671		1.12056	0.45162
	1.12236	0.3861		1.12236	0.45101
	1.12416	0.3855		1.12416	0.45039
	1.12596	0.38489		1.12596	0.44977
	1.12775	0.38429		1.12775	0.44916
	1.12955	0.38368		1.12955	0.44854
	1.13135	0.38308		1.13135	0.44793
	1.13315	0.38248		1.13315	0.44732
	1.13494	0.38188		1.13494	0.44671
	1.13674	0.38128		1.13674	0.4461
	1.13854	0.38068		1.13854	0.44549
	1.14033	0.38008		1.14033	0.44488
	1.14213	0.37949		1.14213	0.44427
	1.14393	0.37889		1.14393	0.44366
	1.14573	0.3783		1.14573	0.44306
	1.14752	0.3777		1.14752	0.44245
	1.14932	0.37711		1.14932	0.44185
	1.15112	0.37652		1.15112	0.44124
	1.15292	0.37593		1.15292	0.44064
	1.15471	0.37534		1.15471	0.44004
	1.15651	0.37475		1.15651	0.43943
	1.15831	0.37416		1.15831	0.43883
	1.16011	0.37357		1.16011	0.43823
	1.1619	0.37299		1.1619	0.43764
	1.1637	0.3724		1.1637	0.43704
	1.1655	0.37181		1.1655	0.43644
	1.16729	0.37123		1.16729	0.43584
	1.16909	0.37065		1.16909	0.43525
	1.17089	0.37007		1.17089	0.43465
	1.17269	0.36949		1.17269	0.43406
	1.17448	0.36891		1.17448	0.43347
	1.17628	0.36833		1.17628	0.43287
	1.17808	0.36775		1.17808	0.43228
	1.17988	0.36717		1.17988	0.43169
	1.18167	0.36659		1.18167	0.4311
	1.18347	0.36602		1.18347	0.43051
	1.18527	0.36544		1.18527	0.42992
	1.18707	0.36487		1.18707	0.42933
	1.18886	0.3643		1.18886	0.42875
	1.19066	0.36373		1.19066	0.42816
	1.19246	0.36316		1.19246	0.42758
	1.19425	0.36259		1.19425	0.42699
	1.19605	0.36202		1.19605	0.42641
	1.19785	0.36145		1.19785	0.42583
	1.19965	0.36088		1.19965	0.42524
	1.20144	0.36031		1.20144	0.42466
	1.20324	0.35975		1.20324	0.42408
	1.20504	0.35918		1.20504	0.4235
	1.20684	0.35862		1.20684	0.42292
	1.20863	0.35806		1.20863	0.42235
	1.21043	0.3575		1.21043	0.42177
	1.21223	0.35693		1.21223	0.42119
	1.21403	0.35637		1.21403	0.42062
	1.21582	0.35581		1.21582	0.42004
	1.21762	0.35526		1.21762	0.41947
	1.21942	0.3547		1.21942	0.41889
	1.22121	0.35414		1.22121	0.41832
	1.22301	0.35359		1.22301	0.41775
	1.22481	0.35303		1.22481	0.41718
	1.22661	0.35248		1.22661	0.41661
	1.2284	0.35192		1.2284	0.41604
	1.2302	0.35137		1.2302	0.41547
	1.232	0.35082		1.232	0.4149
	1.2338	0.35027		1.2338	0.41433
	1.23559	0.34972		1.23559	0.41377
	1.23739	0.34917		1.23739	0.4132
	1.23919	0.34862		1.23919	0.41264
	1.24099	0.34807		1.24099	0.41207
	1.24278	0.34753		1.24278	0.41151
	1.24458	0.34698		1.24458	0.41095
	1.24638	0.34644		1.24638	0.41039
	1.24817	0.34589		1.24817	0.40983
	1.24997	0.34535		1.24997	0.40926
	1.25177	0.34481		1.25177	0.40871
	1.25357	0.34427		1.25357	0.40815
	1.25536	0.34373		1.25536	0.40759
	1.25716	0.34319		1.25716	0.40703
	1.25896	0.34265		1.25896	0.40648
	1.26076	0.34211		1.26076	0.40592
	1.26255	0.34157		1.26255	0.40537
	1.26435	0.34104		1.26435	0.40481
	1.26615	0.3405		1.26615	0.40426
	1.26795	0.33997		1.26795	0.40371
	1.26974	0.33943		1.26974	0.40315
	1.27154	0.3389		1.27154	0.4026
	1.27334	0.33837		1.27334	0.40205
	1.27513	0.33784		1.27513	0.4015
	1.27693	0.33731		1.27693	0.40095
	1.27873	0.33678		1.27873	0.40041
	1.28053	0.33625		1.28053	0.39986
	1.28232	0.33572		1.28232	0.39931
	1.28412	0.33519		1.28412	0.39877
	1.28592	0.33467		1.28592	0.39822
	1.28772	0.33414		1.28772	0.39768
	1.28951	0.33362		1.28951	0.39713
	1.29131	0.33309		1.29131	0.39659
	1.29311	0.33257		1.29311	0.39605
	1.29491	0.33205		1.29491	0.39551
	1.2967	0.33153		1.2967	0.39497
	1.2985	0.33101		1.2985	0.39443
	1.3003	0.33049		1.3003	0.39389
	1.30209	0.32997		1.30209	0.39335
	1.30389	0.32945		1.30389	0.39281
	1.30569	0.32893		1.30569	0.39227
	1.30749	0.32842		1.30749	0.39174
	1.30928	0.3279		1.30928	0.3912
	1.31108	0.32739		1.31108	0.39067
	1.31288	0.32687		1.31288	0.39013
	1.31468	0.32636		1.31468	0.3896
	1.31647	0.32585		1.31647	0.38907
	1.31827	0.32534		1.31827	0.38854
	1.32007	0.32483		1.32007	0.388
	1.32187	0.32432		1.32187	0.38747
	1.32366	0.32381		1.32366	0.38694
	1.32546	0.3233		1.32546	0.38642
	1.32726	0.32279		1.32726	0.38589
	1.32905	0.32228		1.32905	0.38536
	1.33085	0.32178		1.33085	0.38483
	1.33265	0.32127		1.33265	0.38431
	1.33445	0.32077		1.33445	0.38378
	1.33624	0.32027		1.33624	0.38326
	1.33804	0.31976		1.33804	0.38273
	1.33984	0.31926		1.33984	0.38221
	1.34164	0.31876		1.34164	0.38169
	1.34343	0.31826		1.34343	0.38117
	1.34523	0.31776		1.34523	0.38065
	1.34703	0.31726		1.34703	0.38012
	1.34883	0.31676		1.34883	0.37961
	1.35062	0.31627		1.35062	0.37909
	1.35242	0.31577		1.35242	0.37857
	1.35422	0.31527		1.35422	0.37805
	1.35602	0.31478		1.35602	0.37753
	1.35781	0.31428		1.35781	0.37702
	1.35961	0.31379		1.35961	0.3765
	1.36141	0.3133		1.36141	0.37599
	1.3632	0.31281		1.3632	0.37547
	1.365	0.31232		1.365	0.37496
	1.3668	0.31183		1.3668	0.37445
	1.3686	0.31134		1.3686	0.37394
	1.37039	0.31085		1.37039	0.37343
	1.37219	0.31036		1.37219	0.37292
	1.37399	0.30987		1.37399	0.37241
	1.37579	0.30939		1.37579	0.3719
	1.37758	0.3089		1.37758	0.37139
	1.37938	0.30842		1.37938	0.37088
	1.38118	0.30793		1.38118	0.37037
	1.38298	0.30745		1.38298	0.36987
	1.38477	0.30697		1.38477	0.36936
	1.38657	0.30648		1.38657	0.36886
	1.38837	0.306		1.38837	0.36835
	1.39016	0.30552		1.39016	0.36785
	1.39196	0.30504		1.39196	0.36735
	1.39376	0.30456		1.39376	0.36684
	1.39556	0.30409		1.39556	0.36634
	1.39735	0.30361		1.39735	0.36584
	1.39915	0.30313		1.39915	0.36534
	1.40095	0.30266		1.40095	0.36484
	1.40275	0.30218		1.40275	0.36434
	1.40454	0.30171		1.40454	0.36385
	1.40634	0.30123		1.40634	0.36335
	1.40814	0.30076		1.40814	0.36285
	1.40994	0.30029		1.40994	0.36236
	1.41173	0.29982		1.41173	0.36186
	1.41353	0.29935		1.41353	0.36137
	1.41533	0.29888		1.41533	0.36087
	1.41712	0.29841		1.41712	0.36038
	1.41892	0.29794		1.41892	0.35989
	1.42072	0.29747		1.42072	0.35939
	1.42252	0.297		1.42252	0.3589
	1.42431	0.29654		1.42431	0.35841
	1.42611	0.29607		1.42611	0.35792
	1.42791	0.29561		1.42791	0.35743
	1.42971	0.29514		1.42971	0.35694
	1.4315	0.29468		1.4315	0.35646
	1.4333	0.29422		1.4333	0.35597
	1.4351	0.29376		1.4351	0.35548
	1.4369	0.29329		1.4369	0.355
	1.43869	0.29283		1.43869	0.35451
	1.44049	0.29237		1.44049	0.35403
	1.44229	0.29192		1.44229	0.35354
	1.44408	0.29146		1.44408	0.35306
	1.44588	0.291		1.44588	0.35258
	1.44768	0.29054		1.44768	0.3521
	1.44948	0.29009		1.44948	0.35161
	1.45127	0.28963		1.45127	0.35113
	1.45307	0.28918		1.45307	0.35065
	1.45487	0.28872		1.45487	0.35017
	1.45667	0.28827		1.45667	0.3497
	1.45846	0.28782		1.45846	0.34922
	1.46026	0.28737		1.46026	0.34874
	1.46206	0.28691		1.46206	0.34826
	1.46386	0.28646		1.46386	0.34779
	1.46565	0.28601		1.46565	0.34731
	1.46745	0.28557		1.46745	0.34684
	1.46925	0.28512		1.46925	0.34636
	1.47104	0.28467		1.47104	0.34589
	1.47284	0.28422		1.47284	0.34542
	1.47464	0.28378		1.47464	0.34494
	1.47644	0.28333		1.47644	0.34447
	1.47823	0.28289		1.47823	0.344
	1.48003	0.28244		1.48003	0.34353
	1.48183	0.282		1.48183	0.34306
	1.48363	0.28156		1.48363	0.34259
	1.48542	0.28111		1.48542	0.34213
	1.48722	0.28067		1.48722	0.34166
	1.48902	0.28023		1.48902	0.34119
	1.49082	0.27979		1.49082	0.34072
	1.49261	0.27935		1.49261	0.34026
	1.49441	0.27891		1.49441	0.33979
	1.49621	0.27848		1.49621	0.33933
	1.498	0.27804		1.498	0.33887
	1.4998	0.2776		1.4998	0.3384
	1.5016	0.27717		1.5016	0.33794
	1.5034	0.27673		1.5034	0.33748
	1.50519	0.2763		1.50519	0.33702
	1.50699	0.27586		1.50699	0.33656
	1.50879	0.27543		1.50879	0.3361
	1.51059	0.275		1.51059	0.33564
	1.51238	0.27457		1.51238	0.33518
	1.51418	0.27414		1.51418	0.33472
	1.51598	0.27371		1.51598	0.33426
	1.51778	0.27328		1.51778	0.3338
	1.51957	0.27285		1.51957	0.33335
	1.52137	0.27242		1.52137	0.33289
	1.52317	0.27199		1.52317	0.33244
	1.52496	0.27156		1.52496	0.33198
	1.52676	0.27114		1.52676	0.33153
	1.52856	0.27071		1.52856	0.33108
	1.53036	0.27029		1.53036	0.33062
	1.53215	0.26986		1.53215	0.33017
	1.53395	0.26944		1.53395	0.32972
	1.53575	0.26902		1.53575	0.32927
	1.53755	0.26859		1.53755	0.32882
	1.53934	0.26817		1.53934	0.32837
	1.54114	0.26775		1.54114	0.32792
	1.54294	0.26733		1.54294	0.32747
	1.54474	0.26691		1.54474	0.32703
	1.54653	0.26649		1.54653	0.32658
	1.54833	0.26607		1.54833	0.32613
	1.55013	0.26566		1.55013	0.32569
	1.55192	0.26524		1.55192	0.32524
	1.55372	0.26482		1.55372	0.3248
	1.55552	0.26441		1.55552	0.32435
	1.55732	0.26399		1.55732	0.32391
	1.55911	0.26358		1.55911	0.32347
	1.56091	0.26316		1.56091	0.32302
	1.56271	0.26275		1.56271	0.32258
	1.56451	0.26234		1.56451	0.32214
	1.5663	0.26193		1.5663	0.3217
	1.5681	0.26152		1.5681	0.32126
	1.5699	0.26111		1.5699	0.32082
	1.5717	0.2607		1.5717	0.32038
	1.57349	0.26029		1.57349	0.31995
	1.57529	0.25988		1.57529	0.31951
	1.57709	0.25947		1.57709	0.31907
	1.57889	0.25906		1.57889	0.31864
	1.58068	0.25866		1.58068	0.3182
	1.58248	0.25825		1.58248	0.31777
	1.58428	0.25784		1.58428	0.31733
	1.58607	0.25744		1.58607	0.3169
	1.58787	0.25704		1.58787	0.31646
	1.58967	0.25663		1.58967	0.31603
	1.59147	0.25623		1.59147	0.3156
	1.59326	0.25583		1.59326	0.31517
	1.59506	0.25543		1.59506	0.31474
	1.59686	0.25502		1.59686	0.31431
	1.59866	0.25462		1.59866	0.31388
	1.60045	0.25422		1.60045	0.31345
	1.60225	0.25383		1.60225	0.31302
	1.60405	0.25343		1.60405	0.31259
	1.60585	0.25303		1.60585	0.31217
	1.60764	0.25263		1.60764	0.31174
	1.60944	0.25224		1.60944	0.31131
	1.61124	0.25184		1.61124	0.31089
	1.61303	0.25144		1.61303	0.31046
	1.61483	0.25105		1.61483	0.31004
	1.61663	0.25065		1.61663	0.30961
	1.61843	0.25026		1.61843	0.30919
	1.62022	0.24987		1.62022	0.30877
	1.62202	0.24948		1.62202	0.30835
	1.62382	0.24908		1.62382	0.30792
	1.62562	0.24869		1.62562	0.3075
	1.62741	0.2483		1.62741	0.30708
	1.62921	0.24791		1.62921	0.30666
	1.63101	0.24752		1.63101	0.30624
	1.63281	0.24714		1.63281	0.30583
	1.6346	0.24675		1.6346	0.30541
	1.6364	0.24636		1.6364	0.30499
	1.6382	0.24597		1.6382	0.30457
	1.63999	0.24559		1.63999	0.30416
	1.64179	0.2452		1.64179	0.30374
	1.64359	0.24482		1.64359	0.30333
	1.64539	0.24443		1.64539	0.30291
	1.64718	0.24405		1.64718	0.3025
	1.64898	0.24367		1.64898	0.30208
	1.65078	0.24328		1.65078	0.30167
	1.65258	0.2429		1.65258	0.30126
	1.65437	0.24252		1.65437	0.30085
	1.65617	0.24214		1.65617	0.30044
	1.65797	0.24176		1.65797	0.30003
	1.65977	0.24138		1.65977	0.29961
	1.66156	0.241		1.66156	0.29921
	1.66336	0.24062		1.66336	0.2988
	1.66516	0.24025		1.66516	0.29839
	1.66695	0.23987		1.66695	0.29798
	1.66875	0.23949		1.66875	0.29757
	1.67055	0.23912		1.67055	0.29717
	1.67235	0.23874		1.67235	0.29676
	1.67414	0.23837		1.67414	0.29635
	1.67594	0.23799		1.67594	0.29595
	1.67774	0.23762		1.67774	0.29554
	1.67954	0.23724		1.67954	0.29514
	1.68133	0.23687		1.68133	0.29474
	1.68313	0.2365		1.68313	0.29433
	1.68493	0.23613		1.68493	0.29393
	1.68673	0.23576		1.68673	0.29353
	1.68852	0.23539		1.68852	0.29313
	1.69032	0.23502		1.69032	0.29273
	1.69212	0.23465		1.69212	0.29233
	1.69391	0.23428		1.69391	0.29193
	1.69571	0.23391		1.69571	0.29153
	1.69751	0.23355		1.69751	0.29113
	1.69931	0.23318		1.69931	0.29073
	1.7011	0.23281		1.7011	0.29034
	1.7029	0.23245		1.7029	0.28994
	1.7047	0.23208		1.7047	0.28954
	1.7065	0.23172		1.7065	0.28915
	1.70829	0.23136		1.70829	0.28875
	1.71009	0.23099		1.71009	0.28836
	1.71189	0.23063		1.71189	0.28796
	1.71369	0.23027		1.71369	0.28757
	1.71548	0.22991		1.71548	0.28718
	1.71728	0.22955		1.71728	0.28678
	1.71908	0.22919		1.71908	0.28639
	1.72087	0.22883		1.72087	0.286
	1.72267	0.22847		1.72267	0.28561
	1.72447	0.22811		1.72447	0.28522
	1.72627	0.22775		1.72627	0.28483
	1.72806	0.22739		1.72806	0.28444
	1.72986	0.22704		1.72986	0.28405
	1.73166	0.22668		1.73166	0.28366
	1.73346	0.22632		1.73346	0.28327
	1.73525	0.22597		1.73525	0.28289
	1.73705	0.22561		1.73705	0.2825
	1.73885	0.22526		1.73885	0.28211
	1.74065	0.22491		1.74065	0.28173
	1.74244	0.22455		1.74244	0.28134
	1.74424	0.2242		1.74424	0.28096
	1.74604	0.22385		1.74604	0.28058
	1.74783	0.2235		1.74783	0.28019
	1.74963	0.22315		1.74963	0.27981
	1.75143	0.2228		1.75143	0.27943
	1.75323	0.22245		1.75323	0.27904
	1.75502	0.2221		1.75502	0.27866
	1.75682	0.22175		1.75682	0.27828
	1.75862	0.2214		1.75862	0.2779
	1.76042	0.22105		1.76042	0.27752
	1.76221	0.22071		1.76221	0.27714
	1.76401	0.22036		1.76401	0.27676
	1.76581	0.22001		1.76581	0.27639
	1.76761	0.21967		1.76761	0.27601
	1.7694	0.21932		1.7694	0.27563
	1.7712	0.21898		1.7712	0.27525
	1.773	0.21863		1.773	0.27488
	1.7748	0.21829		1.7748	0.2745
	1.77659	0.21795		1.77659	0.27413
	1.77839	0.21761		1.77839	0.27375
	1.78019	0.21726		1.78019	0.27338
	1.78198	0.21692		1.78198	0.273
	1.78378	0.21658		1.78378	0.27263
	1.78558	0.21624		1.78558	0.27226
	1.78738	0.2159		1.78738	0.27189
	1.78917	0.21556		1.78917	0.27151
	1.79097	0.21523		1.79097	0.27114
	1.79277	0.21489		1.79277	0.27077
	1.79457	0.21455		1.79457	0.2704
	1.79636	0.21421		1.79636	0.27003
	1.79816	0.21388		1.79816	0.26966
	1.79996	0.21354		1.79996	0.2693
	1.80176	0.21321		1.80176	0.26893
	1.80355	0.21287		1.80355	0.26856
	1.80535	0.21254		1.80535	0.26819
	1.80715	0.2122		1.80715	0.26783
	1.80894	0.21187		1.80894	0.26746
	1.81074	0.21154		1.81074	0.26709
	1.81254	0.21121		1.81254	0.26673
	1.81434	0.21088		1.81434	0.26636
	1.81613	0.21054		1.81613	0.266
	1.81793	0.21021		1.81793	0.26564
	1.81973	0.20988		1.81973	0.26527
	1.82153	0.20955		1.82153	0.26491
	1.82332	0.20923		1.82332	0.26455
	1.82512	0.2089		1.82512	0.26419
	1.82692	0.20857		1.82692	0.26383
	1.82872	0.20824		1.82872	0.26347
	1.83051	0.20792		1.83051	0.26311
	1.83231	0.20759		1.83231	0.26275
	1.83411	0.20726		1.83411	0.26239
	1.8359	0.20694		1.8359	0.26203
	1.8377	0.20661		1.8377	0.26167
	1.8395	0.20629		1.8395	0.26131
	1.8413	0.20596		1.8413	0.26095
	1.84309	0.20564		1.84309	0.2606
	1.84489	0.20532		1.84489	0.26024
	1.84669	0.205		1.84669	0.25989
	1.84849	0.20467		1.84849	0.25953
	1.85028	0.20435		1.85028	0.25918
	1.85208	0.20403		1.85208	0.25882
	1.85388	0.20371		1.85388	0.25847
	1.85568	0.20339		1.85568	0.25811
	1.85747	0.20307		1.85747	0.25776
	1.85927	0.20275		1.85927	0.25741
	1.86107	0.20244		1.86107	0.25706
	1.86286	0.20212		1.86286	0.25671
	1.86466	0.2018		1.86466	0.25636
	1.86646	0.20148		1.86646	0.25601
	1.86826	0.20117		1.86826	0.25566
	1.87005	0.20085		1.87005	0.25531
	1.87185	0.20054		1.87185	0.25496
	1.87365	0.20022		1.87365	0.25461
	1.87545	0.19991		1.87545	0.25426
	1.87724	0.19959		1.87724	0.25391
	1.87904	0.19928		1.87904	0.25357
	1.88084	0.19897		1.88084	0.25322
	1.88264	0.19866		1.88264	0.25287
	1.88443	0.19834		1.88443	0.25253
	1.88623	0.19803		1.88623	0.25218
	1.88803	0.19772		1.88803	0.25184
	1.88982	0.19741		1.88982	0.25149
	1.89162	0.1971		1.89162	0.25115
	1.89342	0.19679		1.89342	0.25081
	1.89522	0.19648		1.89522	0.25046
	1.89701	0.19617		1.89701	0.25012
	1.89881	0.19587		1.89881	0.24978
	1.90061	0.19556		1.90061	0.24944
	1.90241	0.19525		1.90241	0.2491
	1.9042	0.19495		1.9042	0.24876
	1.906	0.19464		1.906	0.24842
	1.9078	0.19433		1.9078	0.24808
	1.9096	0.19403		1.9096	0.24774
	1.91139	0.19372		1.91139	0.2474
	1.91319	0.19342		1.91319	0.24706
	1.91499	0.19312		1.91499	0.24672
	1.91678	0.19281		1.91678	0.24639
	1.91858	0.19251		1.91858	0.24605
	1.92038	0.19221		1.92038	0.24571
	1.92218	0.19191		1.92218	0.24538
	1.92397	0.19161		1.92397	0.24504

## Sheet: Figure 2D
	Figure 2D
	Ratio of the average, relative nucleation and per barbed end capping rates (Figure 1D).
	growth stress[Pa]	Ratio of the average, relative nucleation and per barbed end capping rates [au]	SEM Ratio of the average, relative nucleation and per barbed end capping rates [au]
	25.5102	1	0
	51.0204	1.21365	0.10332
	102.041	1.39028	0.15779
	255.102	1.85266	0.20132
	510.204	2.11346	0.18871
	765.306	2.47148	0.32008
	1020.41	2.71796	0.3955
