# Supplementary material for: The molecular mechanism of load adaptation by branched actin networks
Source: eLife. 2022 Jun 24;11:e73145. doi: 10.7554/eLife.73145 (PMC9328761; doi:10.7554/eLife.73145)
Supplement: Figure 3—figure supplement 1—source data 1. [file elife-73145-fig3-figsupp1-data1.xlsx]

## Sheet: Figure 3 - Figure Supplement 1
	Figure 3 - Figure Supplement 1
	time [s]	fraction of tracked molecules
	0.5	0.99751
	0.6	0.99502
	1.8	0.99254
	2.4	0.99005
	2.8	0.98756
	4	0.98507
	4.6	0.98259
	4.9	0.9801
	5.2	0.97761
	6	0.97512
	6.1	0.97264
	7	0.97015
	8.3	0.96766
	8.5	0.96517
	8.6	0.96269
	8.8	0.9602
	9.3	0.95771
	9.8	0.95522
	9.9	0.95274
	10.2	0.95025
	11	0.94776
	11.4	0.94527
	11.6	0.94279
	11.6	0.9403
	12.4	0.93781
	12.5	0.93532
	13.7	0.93284
	13.9	0.93035
	14.1	0.92786
	14.6	0.92537
	15.5	0.92289
	15.5	0.9204
	15.6	0.91791
	16.6	0.91542
	17.3	0.91294
	17.4	0.91045
	17.5	0.90796
	17.6	0.90547
	17.7	0.90299
	17.9	0.9005
	18	0.89801
	18.8	0.89552
	19.4	0.89303
	19.5	0.89055
	19.6	0.88806
	20.4	0.88557
	20.5	0.88308
	20.5	0.8806
	20.6	0.87811
	21.1	0.87562
	21.7	0.87313
	21.9	0.87065
	22.4	0.86816
	22.5	0.86567
	22.9	0.86318
	22.9	0.8607
	23.4	0.85821
	23.5	0.85572
	24.4	0.85323
	24.4	0.85075
	25.2	0.84826
	25.3	0.84577
	25.6	0.84328
	26.3	0.8408
	26.4	0.83831
	26.6	0.83582
	27.1	0.83333
	27.1	0.83085
	27.8	0.82836
	28.2	0.82587
	28.3	0.82338
	28.6	0.8209
	29.3	0.81841
	29.6	0.81592
	29.6	0.81343
	29.6	0.81095
	30	0.80846
	30.3	0.80597
	30.3	0.80348
	30.3	0.801
	31.4	0.79851
	31.5	0.79602
	32.1	0.79353
	32.2	0.79104
	32.4	0.78856
	33	0.78607
	33.1	0.78358
	33.2	0.78109
	33.9	0.77861
	33.9	0.77612
	34	0.77363
	34.1	0.77114
	34.9	0.76866
	35.5	0.76617
	35.8	0.76368
	35.9	0.76119
	36	0.75871
	36.1	0.75622
	36.5	0.75373
	37.7	0.75124
	37.8	0.74876
	38.2	0.74627
	38.8	0.74378
	39	0.74129
	39.2	0.73881
	39.6	0.73632
	39.6	0.73383
	40.2	0.73134
	40.3	0.72886
	40.4	0.72637
	40.6	0.72388
	40.8	0.72139
	40.8	0.71891
	40.9	0.71642
	41.2	0.71393
	41.5	0.71144
	41.5	0.70896
	41.7	0.70647
	42.1	0.70398
	42.6	0.70149
	43.3	0.699
	43.6	0.69652
	43.7	0.69403
	44.2	0.69154
	44.3	0.68905
	44.4	0.68657
	44.7	0.68408
	44.7	0.68159
	44.9	0.6791
	44.9	0.67662
	45.7	0.67413
	45.7	0.67164
	46.6	0.66915
	46.7	0.66667
	46.8	0.66418
	47	0.66169
	47.2	0.6592
	47.3	0.65672
	47.3	0.65423
	47.8	0.65174
	47.8	0.64925
	47.9	0.64677
	48.4	0.64428
	48.4	0.64179
	48.8	0.6393
	49.2	0.63682
	49.2	0.63433
	49.7	0.63184
	50.7	0.62935
	51.1	0.62687
	51.1	0.62438
	51.2	0.62189
	51.2	0.6194
	52	0.61692
	52.2	0.61443
	52.3	0.61194
	52.8	0.60945
	52.9	0.60697
	53.2	0.60448
	54.6	0.60199
	54.7	0.5995
	54.7	0.59701
	54.9	0.59453
	54.9	0.59204
	55.1	0.58955
	57	0.58706
	57.4	0.58458
	58.4	0.58209
	58.5	0.5796
	58.7	0.57711
	59	0.57463
	59.2	0.57214
	59.3	0.56965
	60.3	0.56716
	61.6	0.56468
	62.1	0.56219
	62.3	0.5597
	62.6	0.55721
	62.9	0.55473
	63	0.55224
	63.1	0.54975
	63.7	0.54726
	63.8	0.54478
	64.2	0.54229
	64.6	0.5398
	64.8	0.53731
	65	0.53483
	65.1	0.53234
	65.3	0.52985
	67.3	0.52736
	67.6	0.52488
	67.9	0.52239
	68.8	0.5199
	69.6	0.51741
	70.4	0.51493
	71.2	0.51244
	71.7	0.50995
	71.8	0.50746
	71.9	0.50498
	72.4	0.50249
	72.5	0.5
	73.1	0.49751
	73.5	0.49502
	74.8	0.49254
	76.1	0.49005
	76.2	0.48756
	76.3	0.48507
	76.9	0.48259
	76.9	0.4801
	76.9	0.47761
	77.1	0.47512
	77.7	0.47264
	78.2	0.47015
	78.4	0.46766
	78.5	0.46517
	79.3	0.46269
	79.6	0.4602
	80.2	0.45771
	80.5	0.45522
	80.9	0.45274
	81.4	0.45025
	81.5	0.44776
	81.6	0.44527
	82.6	0.44279
	83	0.4403
	83.1	0.43781
	83.1	0.43532
	83.8	0.43284
	84.1	0.43035
	85.7	0.42786
	85.9	0.42537
	87.7	0.42289
	87.7	0.4204
	88.1	0.41791
	88.5	0.41542
	88.6	0.41294
	88.8	0.41045
	89.8	0.40796
	90.6	0.40547
	90.7	0.40299
	91.2	0.4005
	91.8	0.39801
	92	0.39552
	93.4	0.39303
	93.5	0.39055
	94.5	0.38806
	95.3	0.38557
	97.3	0.38308
	97.8	0.3806
	97.9	0.37811
	--	--
	--	--
	--	--
	--	--
	--	--
	--	--
	--	--
	--	--
	--	--
	--	--
	--	--
	--	--
	--	--
	--	--
	--	--
	--	--
	--	--
	--	--
	--	--
	--	--
	--	--
	--	--
	--	--
	--	--
	--	--
	--	--
	--	--
	--	--
	--	--
	--	--
	--	--
	--	--
	--	--
	--	--
	--	--
	--	--
	--	--
	--	--
	--	--
	--	--
	--	--
	--	--
	--	--
	--	--
	--	--
	--	--
	--	--
	--	--
	--	--
	--	--
	--	--
	--	--
	--	--
	--	--
	--	--
	--	--
	--	--
	--	--
	--	--
	--	--
	--	--
	--	--
	--	--
	--	--
	--	--
	--	--
	--	--
	--	--
	--	--
	--	--
	--	--
	--	--
	--	--
	--	--
	--	--
	--	--
	--	--
	--	--
	--	--
	--	--
	--	--
	--	--
	--	--
	--	--
	--	--
	--	--
	--	--
	--	--
	--	--
	--	--
	--	--
	--	--
	--	--
	--	--
	--	--
	--	--
	--	--
	--	--
	--	--
	--	--
	--	--
	--	--
	--	--
	--	--
	--	--
	--	--
	--	--
	--	--
	--	--
	--	--
	--	--
	--	--
	--	--
	--	--
	--	--
	--	--
	--	--
	--	--
	--	--
	--	--
	--	--
	--	--
	--	--
	--	--
	--	--
	--	--
	--	--
	--	--
	--	--
	--	--
	--	--
	--	--
	--	--
	--	--
	--	--
	--	--
	--	--
	--	--
	--	--
	--	--
	--	--
	--	--
	--	--
	--	--
	--	--
	--	--
	--	--
	--	--
	--	--
	--	--
	--	--
	--	--
