# Supplementary material for: The molecular mechanism of load adaptation by branched actin networks
Source: eLife. 2022 Jun 24;11:e73145. doi: 10.7554/eLife.73145 (PMC9328761; doi:10.7554/eLife.73145)
Supplement: Figure 3—source data 1. [file elife-73145-fig3-data1.xlsx]

## Sheet: Figure 3B
	Figure 2B
	255 Pa growth stress networks vs internal controls
	sample	absolute nucleation rate at 255 Pa growth stress [events/s/um2]	absolute nucleation rate control at 0 Pa growth stress [events/s/um2]	relative nucleation rate	SEM relative nucleation rate
	1	3.14941e-06	3.83739e-06	0.820717
	2	5.25228e-06	6.25213e-06	0.840079
	3	3.82505e-06	4.13849e-06	0.924262
	mean	4.07558e-06	4.74267e-06	0.861686	0.0317835
	1020 Pa growth stress networks vs internal controls
	sample	absolute nucleation rate at 1020 Pa growth stress [events/s/um2]	absolute nucleation rate control at 0 Pa growth stress [events/s/um2]	relative nucleation rate	SEM relative nucleation rate
	1	1.92901e-06	2.19711e-06	0.877976
	2	4.40586e-06	5.59662e-06	0.787236
	3	2.51078e-06	3.6414e-06	0.68951
	mean	2.94855e-06	3.81171e-06	0.784907	0.0544181

## Sheet: Figure 3D
	Figure 2D
	Arp2/3 fluorescence transit time for control networks; 0 Pa growth stress			Arp2/3 fluorescence transit time for 255 Pa growth stress networks			Arp2/3 fluorescence transit time for 1020 Pa growth stress networks				Gaussian fit to Arp2/3 fluorescence transit time for control networks; 0 Pa growth stress			Gaussian fit to Arp2/3 fluorescence transit time for 255 Pa growth stress networks			Gaussian fit to Arp2/3 fluorescence transit time for 1020 Pa growth stress networks
	Arp2/3 fluorescence transit time; bin center [s]	Relative frequency		Arp2/3 fluorescence transit time; bin center [s]	Relative frequency		Arp2/3 fluorescence transit time; bin center [s]	Relative frequency			Arp2/3 fluorescence transit time [s]	Relative frequency		Arp2/3 fluorescence transit time [s]	Relative frequency		Arp2/3 fluorescence transit time [s]	Relative frequency
	0.16667	0.02439		0.25	0.01401		0.75	0.02857			0	0.02345		0	0.000196318		0	2.93306e-06
	0.5	0.1239		0.75	0.00701		2.25	0.00714			0.02002	0.0257		0.02002	0.000216688		0.02002	3.0597e-06
	0.83333	0.25659		1.25	0.01226		3.75	0.00357			0.04004	0.02813		0.04004	0.000239006		0.04004	3.19156e-06
	1.16667	0.20098		1.75	0.04028		5.25	0.02857			0.06006	0.03072		0.06006	0.00026344		0.06006	3.32884e-06
	1.5	0.11317		2.25	0.1979		6.75	0.01786			0.08008	0.03349		0.08008	0.000290171		0.08008	3.47176e-06
	1.83333	0.07707		2.75	0.25394		8.25	0.125			0.1001	0.03644		0.1001	0.000319393		0.1001	3.62052e-06
	2.16667	0.04878		3.25	0.16287		9.75	0.26071			0.12012	0.03958		0.12012	0.000351314		0.12012	3.77536e-06
	2.5	0.03512		3.75	0.12609		11.25	0.22857			0.14014	0.04291		0.14014	0.000386158		0.14014	3.93651e-06
	2.83333	0.02439		4.25	0.0683		12.75	0.13214			0.16016	0.04643		0.16016	0.000424164		0.16016	4.10421e-06
	3.16667	0.02244		4.75	0.04028		14.25	0.10714			0.18018	0.05015		0.18018	0.000465588		0.18018	4.27872e-06
	3.5	0.00976		5.25	0.02452		15.75	0.04286			0.2002	0.05407		0.2002	0.000510703		0.2002	4.4603e-06
	3.83333	0.00488		5.75	0.01051		17.25	0.01786			0.22022	0.05818		0.22022	0.000559803		0.22022	4.64922e-06
	4.16667	0.00976		6.25	0.01401		18.75	0			0.24024	0.06249		0.24024	0.000613197		0.24024	4.84576e-06
	4.5	0.00878		6.75	0.00175						0.26026	0.06699		0.26026	0.00067122		0.26026	5.05021e-06
	4.83333	0.00293		7.25	0.00175						0.28028	0.07168		0.28028	0.000734224		0.28028	5.26286e-06
	5.16667	0.00293		7.75	0.00175						0.3003	0.07656		0.3003	0.000802586		0.3003	5.48404e-06
	5.5	0.00585		8.25	0.00525						0.32032	0.08162		0.32032	0.000876705		0.32032	5.71407e-06
	5.83333	0.00195		8.75	0.00175						0.34034	0.08685		0.34034	0.000957006		0.34034	5.95327e-06
	6.16667	0.00097561		9.25	0.00175						0.36036	0.09224		0.36036	0.00104		0.36036	6.20199e-06
	6.5	0.00293		9.75	0.00175						0.38038	0.09779		0.38038	0.00114		0.38038	6.4606e-06
	6.83333	0.00097561		10.25	0.00175						0.4004	0.10347		0.4004	0.00124		0.4004	6.72946e-06
	7.16667	0.00293		10.75	0						0.42042	0.10929		0.42042	0.00135		0.42042	7.00895e-06
	7.5	0.00097561		11.25	0						0.44044	0.11521		0.44044	0.00147		0.44044	7.29948e-06
	7.83333	0		11.75	0						0.46046	0.12123		0.46046	0.0016		0.46046	7.60145e-06
	8.16667	0		12.25	0						0.48048	0.12733		0.48048	0.00173		0.48048	7.91529e-06
	8.5	0.00097561		12.75	0						0.5005	0.13348		0.5005	0.00188		0.5005	8.24143e-06
	8.83333	0.00097561		13.25	0						0.52052	0.13967		0.52052	0.00204		0.52052	8.58033e-06
	9.16667	0		13.75	0.00175						0.54054	0.14588		0.54054	0.00221		0.54054	8.93247e-06
	9.5	0.00097561		14.25	0.00175						0.56056	0.15207		0.56056	0.0024		0.56056	9.29832e-06
	9.83333	0		14.75	0						0.58058	0.15824		0.58058	0.0026		0.58058	9.67839e-06
	10.1667	0.00195		15.25	0						0.6006	0.16435		0.6006	0.00281		0.6006	1.00732e-05
	10.5	0		15.75	0.00175						0.62062	0.17037		0.62062	0.00304		0.62062	1.04833e-05
	10.8333	0		16.25	0.00175						0.64064	0.17629		0.64064	0.00328		0.64064	1.09092e-05
	11.1667	0.00097561		16.75	0.00175						0.66066	0.18208		0.66066	0.00354		0.66066	1.13516e-05
	11.5	0		17.25	0.00175						0.68068	0.1877		0.68068	0.00382		0.68068	1.18109e-05
	11.8333	0.00097561		17.75	0						0.7007	0.19314		0.7007	0.00412		0.7007	1.22879e-05
	12.1667	0.00097561		18.25	0						0.72072	0.19836		0.72072	0.00444		0.72072	1.27831e-05
	12.5	0.00097561		18.75	0						0.74074	0.20335		0.74074	0.00477		0.74074	1.32972e-05
	12.8333	0		19.25	0						0.76076	0.20808		0.76076	0.00514		0.76076	1.38309e-05
	13.1667	0		19.75	0						0.78078	0.21251		0.78078	0.00552		0.78078	1.43849e-05
	13.5	0									0.8008	0.21664		0.8008	0.00593		0.8008	1.49599e-05
	13.8333	0									0.82082	0.22044		0.82082	0.00637		0.82082	1.55566e-05
	14.1667	0									0.84084	0.22388		0.84084	0.00683		0.84084	1.61759e-05
	14.5	0.00195									0.86086	0.22696		0.86086	0.00733		0.86086	1.68185e-05
	14.8333	0									0.88088	0.22965		0.88088	0.00785		0.88088	1.74852e-05
	15.1667	0									0.9009	0.23194		0.9009	0.0084		0.9009	1.8177e-05
	15.5	0.00097561									0.92092	0.23381		0.92092	0.00899		0.92092	1.88946e-05
	15.8333	0									0.94094	0.23526		0.94094	0.00961		0.94094	1.9639e-05
	16.1667	0.00097561									0.96096	0.23628		0.96096	0.01027		0.96096	2.04111e-05
	16.5	0									0.98098	0.23686		0.98098	0.01097		0.98098	2.12119e-05
	16.8333	0									1.001	0.237		1.001	0.0117		1.001	2.20424e-05
	17.1667	0.00097561									1.02102	0.2367		1.02102	0.01247		1.02102	2.29036e-05
	17.5	0									1.04104	0.23596		1.04104	0.01329		1.04104	2.37965e-05
	17.8333	0									1.06106	0.23479		1.06106	0.01415		1.06106	2.47224e-05
	18.1667	0.00195									1.08108	0.23318		1.08108	0.01506		1.08108	2.56822e-05
	18.5	0									1.1011	0.23115		1.1011	0.01601		1.1011	2.66771e-05
	18.8333	0.00097561									1.12112	0.22872		1.12112	0.01701		1.12112	2.77085e-05
	19.1667	0.00097561									1.14114	0.22589		1.14114	0.01806		1.14114	2.87774e-05
	19.5	0									1.16116	0.22268		1.16116	0.01916		1.16116	2.98852e-05
	19.8333	0									1.18118	0.2191		1.18118	0.02032		1.18118	3.10332e-05
											1.2012	0.21518		1.2012	0.02153		1.2012	3.22227e-05
											1.22122	0.21094		1.22122	0.02279		1.22122	3.34552e-05
											1.24124	0.2064		1.24124	0.02412		1.24124	3.47321e-05
											1.26126	0.20158		1.26126	0.0255		1.26126	3.60549e-05
											1.28128	0.1965		1.28128	0.02694		1.28128	3.74252e-05
											1.3013	0.1912		1.3013	0.02845		1.3013	3.88444e-05
											1.32132	0.18569		1.32132	0.03002		1.32132	4.03143e-05
											1.34134	0.18		1.34134	0.03165		1.34134	4.18365e-05
											1.36136	0.17417		1.36136	0.03335		1.36136	4.34127e-05
											1.38138	0.16821		1.38138	0.03512		1.38138	4.50448e-05
											1.4014	0.16215		1.4014	0.03695		1.4014	4.67345e-05
											1.42142	0.15601		1.42142	0.03886		1.42142	4.84838e-05
											1.44144	0.14983		1.44144	0.04083		1.44144	5.02946e-05
											1.46146	0.14363		1.46146	0.04287		1.46146	5.21689e-05
											1.48148	0.13743		1.48148	0.04499		1.48148	5.41088e-05
											1.5015	0.13125		1.5015	0.04718		1.5015	5.61164e-05
											1.52152	0.12511		1.52152	0.04943		1.52152	5.81939e-05
											1.54154	0.11904		1.54154	0.05176		1.54154	6.03435e-05
											1.56156	0.11306		1.56156	0.05417		1.56156	6.25676e-05
											1.58158	0.10717		1.58158	0.05664		1.58158	6.48686e-05
											1.6016	0.1014		1.6016	0.05919		1.6016	6.72488e-05
											1.62162	0.09576		1.62162	0.06181		1.62162	6.97109e-05
											1.64164	0.09027		1.64164	0.0645		1.64164	7.22575e-05
											1.66166	0.08494		1.66166	0.06726		1.66166	7.48911e-05
											1.68168	0.07977		1.68168	0.07009		1.68168	7.76147e-05
											1.7017	0.07477		1.7017	0.07299		1.7017	8.04309e-05
											1.72172	0.06996		1.72172	0.07596		1.72172	8.33427e-05
											1.74174	0.06534		1.74174	0.07899		1.74174	8.63531e-05
											1.76176	0.06091		1.76176	0.08209		1.76176	8.94652e-05
											1.78178	0.05667		1.78178	0.08525		1.78178	9.26822e-05
											1.8018	0.05263		1.8018	0.08847		1.8018	9.60072e-05
											1.82182	0.04878		1.82182	0.09175		1.82182	9.94437e-05
											1.84184	0.04514		1.84184	0.09508		1.84184	0.000102995
											1.86186	0.04169		1.86186	0.09847		1.86186	0.000106665
											1.88188	0.03843		1.88188	0.1019		1.88188	0.000110457
											1.9019	0.03535		1.9019	0.10538		1.9019	0.000114374
											1.92192	0.03247		1.92192	0.10891		1.92192	0.000118421
											1.94194	0.02976		1.94194	0.11248		1.94194	0.000122602
											1.96196	0.02723		1.96196	0.11608		1.96196	0.00012692
											1.98198	0.02487		1.98198	0.11972		1.98198	0.00013138
											2.002	0.02267		2.002	0.12338		2.002	0.000135986
											2.02202	0.02063		2.02202	0.12707		2.02202	0.000140743
											2.04204	0.01873		2.04204	0.13077		2.04204	0.000145654
											2.06206	0.01698		2.06206	0.1345		2.06206	0.000150724
											2.08208	0.01536		2.08208	0.13823		2.08208	0.000155959
											2.1021	0.01387		2.1021	0.14197		2.1021	0.000161363
											2.12212	0.01251		2.12212	0.1457		2.12212	0.000166941
											2.14214	0.01125		2.14214	0.14944		2.14214	0.000172699
											2.16216	0.0101		2.16216	0.15316		2.16216	0.00017864
											2.18218	0.00906		2.18218	0.15686		2.18218	0.000184772
											2.2022	0.0081		2.2022	0.16055		2.2022	0.000191099
											2.22222	0.00724		2.22222	0.1642		2.22222	0.000197627
											2.24224	0.00645		2.24224	0.16783		2.24224	0.000204361
											2.26226	0.00574		2.26226	0.17141		2.26226	0.000211309
											2.28228	0.0051		2.28228	0.17495		2.28228	0.000218476
											2.3023	0.00452		2.3023	0.17844		2.3023	0.000225867
											2.32232	0.004		2.32232	0.18188		2.32232	0.000233491
											2.34234	0.00353		2.34234	0.18525		2.34234	0.000241353
											2.36236	0.00311		2.36236	0.18855		2.36236	0.000249459
											2.38238	0.00274		2.38238	0.19178		2.38238	0.000257818
											2.4024	0.0024		2.4024	0.19493		2.4024	0.000266436
											2.42242	0.00211		2.42242	0.198		2.42242	0.00027532
											2.44244	0.00184		2.44244	0.20097		2.44244	0.000284478
											2.46246	0.00161		2.46246	0.20384		2.46246	0.000293917
											2.48248	0.0014		2.48248	0.20662		2.48248	0.000303645
											2.5025	0.00122		2.5025	0.20929		2.5025	0.000313671
											2.52252	0.00106		2.52252	0.21184		2.52252	0.000324002
											2.54254	0.000919221		2.54254	0.21428		2.54254	0.000334647
											2.56256	0.000795297		2.56256	0.21659		2.56256	0.000345615
											2.58258	0.000686798		2.58258	0.21878		2.58258	0.000356913
											2.6026	0.000591997		2.6026	0.22084		2.6026	0.000368552
											2.62262	0.000509331		2.62262	0.22276		2.62262	0.000380541
											2.64264	0.000437393		2.64264	0.22455		2.64264	0.000392888
											2.66266	0.000374915		2.66266	0.22619		2.66266	0.000405604
											2.68268	0.000320763		2.68268	0.22768		2.68268	0.000418699
											2.7027	0.000273922		2.7027	0.22903		2.7027	0.000432182
											2.72272	0.000233485		2.72272	0.23022		2.72272	0.000446065
											2.74274	0.000198647		2.74274	0.23127		2.74274	0.000460356
											2.76276	0.000168693		2.76276	0.23215		2.76276	0.000475069
											2.78278	0.000142988		2.78278	0.23288		2.78278	0.000490212
											2.8028	0.000120975		2.8028	0.23345		2.8028	0.000505799
											2.82282	0.00010216		2.82282	0.23385		2.82282	0.00052184
											2.84284	8.61101e-05		2.84284	0.2341		2.84284	0.000538347
											2.86286	7.24469e-05		2.86286	0.23418		2.86286	0.000555332
											2.88288	6.08381e-05		2.88288	0.2341		2.88288	0.000572808
											2.9029	5.09943e-05		2.9029	0.23386		2.9029	0.000590788
											2.92292	4.26637e-05		2.92292	0.23346		2.92292	0.000609284
											2.94294	3.56275e-05		2.94294	0.2329		2.94294	0.000628309
											2.96296	2.96963e-05		2.96296	0.23217		2.96296	0.000647877
											2.98298	2.47065e-05		2.98298	0.23129		2.98298	0.000668002
											3.003	2.05168e-05		3.003	0.23026		3.003	0.000688697
											3.02302	1.70058e-05		3.02302	0.22906		3.02302	0.000709978
											3.04304	1.40694e-05		3.04304	0.22772		3.04304	0.000731858
											3.06306	1.16184e-05		3.06306	0.22623		3.06306	0.000754354
											3.08308	9.57648e-06		3.08308	0.22459		3.08308	0.000777479
											3.1031	7.87873e-06		3.1031	0.22281		3.1031	0.00080125
											3.12312	6.46989e-06		3.12312	0.22089		3.12312	0.000825682
											3.14314	5.30308e-06		3.14314	0.21884		3.14314	0.000850793
											3.16316	4.3386e-06		3.16316	0.21666		3.16316	0.000876598
											3.18318	3.54292e-06		3.18318	0.21434		3.18318	0.000903114
											3.2032	2.88778e-06		3.2032	0.21191		3.2032	0.000930359
											3.22322	2.34939e-06		3.22322	0.20936		3.22322	0.00095835
											3.24324	1.90783e-06		3.24324	0.20669		3.24324	0.000987106
											3.26326	1.54637e-06		3.26326	0.20392		3.26326	0.00102
											3.28328	1.25105e-06		3.28328	0.20105		3.28328	0.00105
											3.3033	1.01025e-06		3.3033	0.19808		3.3033	0.00108
											3.32332	8.14283e-07		3.32332	0.19502		3.32332	0.00111
											3.34334	6.55104e-07		3.34334	0.19187		3.34334	0.00114
											3.36336	5.2606e-07		3.36336	0.18864		3.36336	0.00118
											3.38338	4.21649e-07		3.38338	0.18534		3.38338	0.00121
											3.4034	3.37332e-07		3.4034	0.18197		3.4034	0.00125
											3.42342	2.69373e-07		3.42342	0.17854		3.42342	0.00128
											3.44344	2.14705e-07		3.44344	0.17505		3.44344	0.00132
											3.46346	1.70812e-07		3.46346	0.17151		3.46346	0.00136
											3.48348	1.3564e-07		3.48348	0.16793		3.48348	0.0014
											3.5035	1.07509e-07		3.5035	0.16431		3.5035	0.00144
											3.52352	8.50537e-08		3.52352	0.16065		3.52352	0.00148
											3.54354	6.71633e-08		3.54354	0.15697		3.54354	0.00152
											3.56356	5.29373e-08		3.56356	0.15326		3.56356	0.00157
											3.58358	4.16468e-08		3.58358	0.14954		3.58358	0.00161
											3.6036	3.27033e-08		3.6036	0.14581		3.6036	0.00166
											3.62362	2.56326e-08		3.62362	0.14207		3.62362	0.00171
											3.64364	2.00532e-08		3.64364	0.13833		3.64364	0.00175
											3.66366	1.5659e-08		3.66366	0.1346		3.66366	0.0018
											3.68368	1.2205e-08		3.68368	0.13088		3.68368	0.00185
											3.7037	9.49508e-09		3.7037	0.12717		3.7037	0.00191
											3.72372	7.37312e-09		3.72372	0.12348		3.72372	0.00196
											3.74374	5.71471e-09		3.74374	0.11982		3.74374	0.00201
											3.76376	4.42107e-09		3.76376	0.11618		3.76376	0.00207
											3.78378	3.4139e-09		3.78378	0.11258		3.78378	0.00213
											3.8038	2.63127e-09		3.8038	0.10901		3.8038	0.00219
											3.82382	2.02428e-09		3.82382	0.10548		3.82382	0.00225
											3.84384	1.55441e-09		3.84384	0.102		3.84384	0.00231
											3.86386	1.19138e-09		3.86386	0.09856		3.86386	0.00237
											3.88388	9.11436e-10		3.88388	0.09517		3.88388	0.00244
											3.9039	6.95973e-10		3.9039	0.09184		3.9039	0.00251
											3.92392	5.30456e-10		3.92392	0.08856		3.92392	0.00257
											3.94394	4.03549e-10		3.94394	0.08534		3.94394	0.00264
											3.96396	3.06431e-10		3.96396	0.08218		3.96396	0.00271
											3.98398	2.32253e-10		3.98398	0.07908		3.98398	0.00279
											4.004	1.75703e-10		4.004	0.07604		4.004	0.00286
											4.02402	1.32675e-10		4.02402	0.07308		4.02402	0.00294
											4.04404	9.99969e-11		4.04404	0.07017		4.04404	0.00302
											4.06406	7.52274e-11		4.06406	0.06734		4.06406	0.0031
											4.08408	5.6488e-11		4.08408	0.06458		4.08408	0.00318
											4.1041	4.23376e-11		4.1041	0.06189		4.1041	0.00327
											4.12412	3.16728e-11		4.12412	0.05926		4.12412	0.00335
											4.14414	2.36503e-11		4.14414	0.05671		4.14414	0.00344
											4.16416	1.7627e-11		4.16416	0.05424		4.16416	0.00353
											4.18418	1.31133e-11		4.18418	0.05183		4.18418	0.00362
											4.2042	9.73717e-12		4.2042	0.0495		4.2042	0.00372
											4.22422	7.21681e-12		4.22422	0.04724		4.22422	0.00382
											4.24424	5.33886e-12		4.24424	0.04505		4.24424	0.00391
											4.26426	3.94223e-12		4.26426	0.04293		4.26426	0.00402
											4.28428	2.90553e-12		4.28428	0.04089		4.28428	0.00412
											4.3043	2.13747e-12		4.3043	0.03891		4.3043	0.00422
											4.32432	1.56951e-12		4.32432	0.037		4.32432	0.00433
											4.34434	1.15032e-12		4.34434	0.03517		4.34434	0.00444
											4.36436	8.4152e-13		4.36436	0.0334		4.36436	0.00456
											4.38438	6.14469e-13		4.38438	0.0317		4.38438	0.00467
											4.4044	4.47843e-13		4.4044	0.03006		4.4044	0.00479
											4.42442	3.25794e-13		4.42442	0.02849		4.42442	0.00491
											4.44444	2.36564e-13		4.44444	0.02698		4.44444	0.00503
											4.46446	1.71454e-13		4.46446	0.02554		4.46446	0.00516
											4.48448	1.24032e-13		4.48448	0.02415		4.48448	0.00529
											4.5045	8.95597e-14		4.5045	0.02283		4.5045	0.00542
											4.52452	6.45478e-14		4.52452	0.02156		4.52452	0.00556
											4.54454	4.64344e-14		4.54454	0.02035		4.54454	0.00569
											4.56456	3.33418e-14		4.56456	0.01919		4.56456	0.00583
											4.58458	2.38962e-14		4.58458	0.01809		4.58458	0.00598
											4.6046	1.70946e-14		4.6046	0.01704		4.6046	0.00612
											4.62462	1.22062e-14		4.62462	0.01603		4.62462	0.00627
											4.64464	8.69943e-15		4.64464	0.01508		4.64464	0.00643
											4.66466	6.18859e-15		4.66466	0.01417		4.66466	0.00658
											4.68468	4.39424e-15		4.68468	0.01331		4.68468	0.00674
											4.7047	3.11434e-15		4.7047	0.0125		4.7047	0.0069
											4.72472	2.20312e-15		4.72472	0.01172		4.72472	0.00707
											4.74474	1.55561e-15		4.74474	0.01099		4.74474	0.00724
											4.76476	1.09636e-15		4.76476	0.01029		4.76476	0.00741
											4.78478	7.71255e-16		4.78478	0.00963		4.78478	0.00759
											4.8048	5.41542e-16		4.8048	0.00901		4.8048	0.00777
											4.82482	3.79539e-16		4.82482	0.00842		4.82482	0.00795
											4.84484	2.65504e-16		4.84484	0.00786		4.84484	0.00814
											4.86486	1.85386e-16		4.86486	0.00734		4.86486	0.00833
											4.88488	1.29203e-16		4.88488	0.00685		4.88488	0.00852
											4.9049	8.98791e-17		4.9049	0.00638		4.9049	0.00872
											4.92492	6.24073e-17		4.92492	0.00594		4.92492	0.00892
											4.94494	4.32516e-17		4.94494	0.00553		4.94494	0.00913
											4.96496	2.99198e-17		4.96496	0.00515		4.96496	0.00934
											4.98498	2.06589e-17		4.98498	0.00478		4.98498	0.00955
											5.00501	1.42379e-17		5.00501	0.00444		5.00501	0.00977
											5.02503	9.7943e-18		5.02503	0.00413		5.02503	0.00999
											5.04505	6.725e-18		5.04505	0.00383		5.04505	0.01022
											5.06507	4.60895e-18		5.06507	0.00355		5.06507	0.01045
											5.08509	3.15284e-18		5.08509	0.00329		5.08509	0.01069
											5.10511	2.15274e-18		5.10511	0.00304		5.10511	0.01093
											5.12513	1.46714e-18		5.12513	0.00281		5.12513	0.01117
											5.14515	9.98028e-19		5.14515	0.0026		5.14515	0.01142
											5.16517	6.77648e-19		5.16517	0.0024		5.16517	0.01168
											5.18519	4.59257e-19		5.18519	0.00222		5.18519	0.01194
											5.20521	3.10669e-19		5.20521	0.00205		5.20521	0.0122
											5.22523	2.09764e-19		5.22523	0.00189		5.22523	0.01247
											5.24525	1.41369e-19		5.24525	0.00174		5.24525	0.01274
											5.26527	9.50969e-20		5.26527	0.0016		5.26527	0.01302
											5.28529	6.38513e-20		5.28529	0.00147		5.28529	0.0133
											5.30531	4.27921e-20		5.30531	0.00135		5.30531	0.01359
											5.32533	2.86252e-20		5.32533	0.00124		5.32533	0.01388
											5.34535	1.91127e-20		5.34535	0.00114		5.34535	0.01418
											5.36537	1.27376e-20		5.36537	0.00105		5.36537	0.01449
											5.38539	8.47313e-21		5.38539	0.000959324		5.38539	0.01479
											5.40541	5.62587e-21		5.40541	0.000878845		5.40541	0.01511
											5.42543	3.72843e-21		5.42543	0.00080456		5.42543	0.01543
											5.44545	2.46634e-21		5.44545	0.000736045		5.44545	0.01575
											5.46547	1.62844e-21		5.46547	0.000672897		5.46547	0.01609
											5.48549	1.07319e-21		5.48549	0.000614742		5.48549	0.01642
											5.50551	7.05954e-22		5.50551	0.000561223		5.50551	0.01677
											5.52553	4.63516e-22		5.52553	0.000512009		5.52553	0.01711
											5.54555	3.03769e-22		5.54555	0.000466787		5.54555	0.01747
											5.56557	1.98707e-22		5.56557	0.000425265		5.56557	0.01783
											5.58559	1.2974e-22		5.58559	0.000387168		5.58559	0.01819
											5.60561	8.45517e-23		5.60561	0.000352239		5.60561	0.01857
											5.62563	5.5e-23		5.62563	0.00032024		5.62563	0.01894
											5.64565	3.57103e-23		5.64565	0.000290946		5.64565	0.01933
											5.66567	2.31427e-23		5.66567	0.000264149		5.66567	0.01972
											5.68569	1.49702e-23		5.68569	0.000239654		5.68569	0.02012
											5.70571	9.66559e-24		5.70571	0.00021728		5.70571	0.02052
											5.72573	6.22903e-24		5.72573	0.000196858		5.72573	0.02093
											5.74575	4.00685e-24		5.74575	0.000178232		5.74575	0.02135
											5.76577	2.57263e-24		5.76577	0.000161257		5.76577	0.02177
											5.78579	1.6487e-24		5.78579	0.000145797		5.78579	0.0222
											5.80581	1.05462e-24		5.80581	0.000131728		5.80581	0.02264
											5.82583	6.73347e-25		5.82583	0.000118935		5.82583	0.02308
											5.84585	4.29115e-25		5.84585	0.000107309		5.84585	0.02353
											5.86587	2.7296e-25		5.86587	9.6753e-05		5.86587	0.02398
											5.88589	1.73306e-25		5.88589	8.71749e-05		5.88589	0.02445
											5.90591	1.0983e-25		5.90591	7.84906e-05		5.90591	0.02492
											5.92593	6.94731e-26		5.92593	7.06224e-05		5.92593	0.0254
											5.94595	4.38635e-26		5.94595	6.3499e-05		5.94595	0.02588
											5.96597	2.76427e-26		5.96597	5.70546e-05		5.96597	0.02637
											5.98599	1.73879e-26		5.98599	5.12287e-05		5.98599	0.02687
											6.00601	1.09171e-26		6.00601	4.59658e-05		6.00601	0.02738
											6.02603	6.84155e-27		6.02603	4.12151e-05		6.02603	0.02789
											6.04605	4.2795e-27		6.04605	3.69297e-05		6.04605	0.02841
											6.06607	2.67191e-27		6.06607	3.30671e-05		6.06607	0.02894
											6.08609	1.66511e-27		6.08609	2.95879e-05		6.08609	0.02948
											6.10611	1.03574e-27		6.10611	2.64564e-05		6.10611	0.03002
											6.12613	6.43062e-28		6.12613	2.364e-05		6.12613	0.03057
											6.14615	3.98514e-28		6.14615	2.11088e-05		6.14615	0.03113
											6.16617	2.46504e-28		6.16617	1.88356e-05		6.16617	0.0317
											6.18619	1.52193e-28		6.18619	1.67955e-05		6.18619	0.03227
											6.20621	9.37903e-29		6.20621	1.4966e-05		6.20621	0.03286
											6.22623	5.76913e-29		6.22623	1.33266e-05		6.22623	0.03345
											6.24625	3.54204e-29		6.24625	1.18585e-05		6.24625	0.03404
											6.26627	2.17063e-29		6.26627	1.05449e-05		6.26627	0.03465
											6.28629	1.32773e-29		6.28629	9.37027e-06		6.28629	0.03526
											6.30631	8.10632e-30		6.30631	8.32072e-06		6.30631	0.03589
											6.32633	4.94001e-30		6.32633	7.38362e-06		6.32633	0.03652
											6.34635	3.00485e-30		6.34635	6.54752e-06		6.34635	0.03715
											6.36637	1.82435e-30		6.36637	5.80208e-06		6.36637	0.0378
											6.38639	1.10556e-30		6.38639	5.13794e-06		6.38639	0.03846
											6.40641	6.68728e-31		6.40641	4.54668e-06		6.40641	0.03912
											6.42643	4.03744e-31		6.42643	4.02067e-06		6.42643	0.03979
											6.44645	2.43306e-31		6.44645	3.55305e-06		6.44645	0.04047
											6.46647	1.46349e-31		6.46647	3.13764e-06		6.46647	0.04116
											6.48649	8.78653e-32		6.48649	2.76889e-06		6.48649	0.04185
											6.50651	5.26545e-32		6.50651	2.44178e-06		6.50651	0.04256
											6.52653	3.14951e-32		6.52653	2.15182e-06		6.52653	0.04327
											6.54655	1.88037e-32		6.54655	1.89498e-06		6.54655	0.04399
											6.56657	1.12055e-32		6.56657	1.66764e-06		6.56657	0.04472
											6.58659	6.66517e-33		6.58659	1.46656e-06		6.58659	0.04546
											6.60661	3.95714e-33		6.60661	1.28883e-06		6.60661	0.04621
											6.62663	2.34499e-33		6.62663	1.13186e-06		6.62663	0.04697
											6.64665	1.38705e-33		6.64665	9.93315e-07		6.64665	0.04773
											6.66667	8.18904e-34		6.66667	8.71126e-07		6.66667	0.0485
											6.68669	4.82575e-34		6.68669	7.63439e-07		6.68669	0.04928
											6.70671	2.83848e-34		6.70671	6.686e-07		6.70671	0.05007
											6.72673	1.66648e-34		6.72673	5.85137e-07		6.72673	0.05087
											6.74675	9.76566e-35		6.74675	5.11739e-07		6.74675	0.05168
											6.76677	5.71208e-35		6.76677	4.47237e-07		6.76677	0.0525
											6.78679	3.33486e-35		6.78679	3.90595e-07		6.78679	0.05332
											6.80681	1.94335e-35		6.80681	3.4089e-07		6.80681	0.05416
											6.82683	1.13036e-35		6.82683	2.97305e-07		6.82683	0.055
											6.84685	6.56253e-36		6.84685	2.59112e-07		6.84685	0.05585
											6.86687	3.80291e-36		6.86687	2.2567e-07		6.86687	0.05671
											6.88689	2.19964e-36		6.88689	1.96408e-07		6.88689	0.05758
											6.90691	1.26992e-36		6.90691	1.70821e-07		6.90691	0.05845
											6.92693	7.31803e-37		6.92693	1.48465e-07		6.92693	0.05934
											6.94695	4.20921e-37		6.94695	1.28946e-07		6.94695	0.06024
											6.96697	2.41656e-37		6.96697	1.11915e-07		6.96697	0.06114
											6.98699	1.38479e-37		6.98699	9.70664e-08		6.98699	0.06205
											7.00701	7.92069e-38		7.00701	8.41295e-08		7.00701	0.06297
											7.02703	4.52201e-38		7.02703	7.28664e-08		7.02703	0.0639
											7.04705	2.57686e-38		7.04705	6.30674e-08		7.04705	0.06484
											7.06707	1.46568e-38		7.06707	5.45484e-08		7.06707	0.06578
											7.08709	8.32106e-39		7.08709	4.71474e-08		7.08709	0.06674
											7.10711	4.71529e-39		7.10711	4.07224e-08		7.10711	0.0677
											7.12713	2.66704e-39		7.12713	3.51486e-08		7.12713	0.06867
											7.14715	1.5057e-39		7.14715	3.03167e-08		7.14715	0.06965
											7.16717	8.48478e-40		7.16717	2.61309e-08		7.16717	0.07064
											7.18719	4.77235e-40		7.18719	2.25074e-08		7.18719	0.07164
											7.20721	2.67925e-40		7.20721	1.9373e-08		7.20721	0.07264
											7.22723	1.50136e-40		7.22723	1.66636e-08		7.22723	0.07366
											7.24725	8.39748e-41		7.24725	1.43231e-08		7.24725	0.07468
											7.26727	4.68815e-41		7.26727	1.23028e-08		7.26727	0.07571
											7.28729	2.61243e-41		7.28729	1.05602e-08		7.28729	0.07675
											7.30731	1.45305e-41		7.30731	9.05816e-09		7.30731	0.07779
											7.32733	8.06684e-42		7.32733	7.76437e-09		7.32733	0.07885
											7.34735	4.47011e-42		7.34735	6.65076e-09		7.34735	0.07991
											7.36737	2.47243e-42		7.36737	5.69293e-09		7.36737	0.08098
											7.38739	1.36496e-42		7.38739	4.86967e-09		7.38739	0.08206
											7.40741	7.5215e-43		7.40741	4.16257e-09		7.40741	0.08314
											7.42743	4.13695e-43		7.42743	3.55569e-09		7.42743	0.08424
											7.44745	2.27116e-43		7.44745	3.03518e-09		7.44745	0.08534
											7.46747	1.24453e-43		7.46747	2.58907e-09		7.46747	0.08645
											7.48749	6.80694e-44		7.48749	2.20701e-09		7.48749	0.08756
											7.50751	3.71612e-44		7.50751	1.88002e-09		7.50751	0.08869
											7.52753	2.02497e-44		7.52753	1.60037e-09		7.52753	0.08982
											7.54755	1.10138e-44		7.54755	1.36137e-09		7.54755	0.09096
											7.56757	5.97924e-45		7.56757	1.15726e-09		7.56757	0.0921
											7.58759	3.24e-45		7.58759	9.83077e-10		7.58759	0.09325
											7.60761	1.75241e-45		7.60761	8.34529e-10		7.60761	0.09441
											7.62763	9.46052e-46		7.62763	7.07938e-10		7.62763	0.09558
											7.64765	5.09784e-46		7.64765	6.00133e-10		7.64765	0.09675
											7.66767	2.74187e-46		7.66767	5.08392e-10		7.66767	0.09793
											7.68769	1.47197e-46		7.68769	4.30378e-10		7.68769	0.09912
											7.70771	7.88751e-47		7.70771	3.64083e-10		7.70771	0.10031
											7.72773	4.21864e-47		7.72773	3.07786e-10		7.72773	0.10151
											7.74775	2.25214e-47		7.74775	2.60014e-10		7.74775	0.10272
											7.76777	1.20007e-47		7.76777	2.19505e-10		7.76777	0.10393
											7.78779	6.3828e-48		7.78779	1.85179e-10		7.78779	0.10514
											7.80781	3.38848e-48		7.80781	1.56112e-10		7.80781	0.10637
											7.82783	1.79552e-48		7.82783	1.31517e-10		7.82783	0.1076
											7.84785	9.49651e-49		7.84785	1.1072e-10		7.84785	0.10883
											7.86787	5.01336e-49		7.86787	9.3147e-11		7.86787	0.11007
											7.88789	2.64171e-49		7.88789	7.83089e-11		7.88789	0.11132
											7.90791	1.38941e-49		7.90791	6.57889e-11		7.90791	0.11257
											7.92793	7.29401e-50		7.92793	5.52323e-11		7.92793	0.11382
											7.94795	3.82202e-50		7.94795	4.63376e-11		7.94795	0.11508
											7.96797	1.99899e-50		7.96797	3.88483e-11		7.96797	0.11635
											7.98799	1.04356e-50		7.98799	3.2547e-11		7.98799	0.11762
											8.00801	5.4377e-51		8.00801	2.72488e-11		8.00801	0.11889
											8.02803	2.82816e-51		8.02803	2.27973e-11		8.02803	0.12017
											8.04805	1.46819e-51		8.04805	1.90599e-11		8.04805	0.12146
											8.06807	7.60766e-52		8.06807	1.59241e-11		8.06807	0.12274
											8.08809	3.93469e-52		8.08809	1.3295e-11		8.08809	0.12403
											8.10811	2.03124e-52		8.10811	1.10923e-11		8.10811	0.12533
											8.12813	1.04665e-52		8.12813	9.24812e-12		8.12813	0.12663
											8.14815	5.38308e-53		8.14815	7.70522e-12		8.14815	0.12793
											8.16817	2.76345e-53		8.16817	6.41528e-12		8.16817	0.12923
											8.18819	1.416e-53		8.18819	5.33759e-12		8.18819	0.13054
											8.20821	7.24211e-54		8.20821	4.43786e-12		8.20821	0.13185
											8.22823	3.69707e-54		8.22823	3.68724e-12		8.22823	0.13316
											8.24825	1.88382e-54		8.24825	3.06146e-12		8.24825	0.13448
											8.26827	9.58105e-55		8.26827	2.54013e-12		8.26827	0.1358
											8.28829	4.86381e-55		8.28829	2.10611e-12		8.28829	0.13712
											8.30831	2.46451e-55		8.30831	1.74504e-12		8.30831	0.13844
											8.32833	1.24645e-55		8.32833	1.44487e-12		8.32833	0.13976
											8.34835	6.29229e-56		8.34835	1.19551e-12		8.34835	0.14109
											8.36837	3.17054e-56		8.36837	9.88494e-13		8.36837	0.14241
											8.38839	1.59459e-56		8.38839	8.16761e-13		8.38839	0.14374
											8.40841	8.00488e-57		8.40841	6.74397e-13		8.40841	0.14507
											8.42843	4.01099e-57		8.42843	5.56461e-13		8.42843	0.1464
											8.44845	2.00603e-57		8.44845	4.58832e-13		8.44845	0.14773
											8.46847	1.00142e-57		8.46847	3.78069e-13		8.46847	0.14906
											8.48849	4.98979e-58		8.48849	3.11307e-13		8.48849	0.15039
											8.50851	2.48165e-58		8.50851	2.56156e-13		8.50851	0.15172
											8.52853	1.23194e-58		8.52853	2.1063e-13		8.52853	0.15304
											8.54855	6.10417e-59		8.54855	1.73075e-13		8.54855	0.15437
											8.56857	3.01895e-59		8.56857	1.42118e-13		8.56857	0.1557
											8.58859	1.4903e-59		8.58859	1.16617e-13		8.58859	0.15703
											8.60861	7.34319e-60		8.60861	9.56252e-14		8.60861	0.15836
											8.62863	3.61148e-60		8.62863	7.8358e-14		8.62863	0.15968
											8.64865	1.77286e-60		8.64865	6.41643e-14		8.64865	0.161
											8.66867	8.68673e-61		8.66867	5.25053e-14		8.66867	0.16232
											8.68869	4.24842e-61		8.68869	4.2935e-14		8.68869	0.16364
											8.70871	2.07391e-61		8.70871	3.50848e-14		8.70871	0.16496
											8.72873	1.01051e-61		8.72873	2.86501e-14		8.72873	0.16627
											8.74875	4.91455e-62		8.74875	2.33793e-14		8.74875	0.16759
											8.76877	2.38571e-62		8.76877	1.9065e-14		8.76877	0.16889
											8.78879	1.15595e-62		8.78879	1.55361e-14		8.78879	0.1702
											8.80881	5.59054e-63		8.80881	1.26516e-14		8.80881	0.1715
											8.82883	2.69872e-63		8.82883	1.02955e-14		8.82883	0.1728
											8.84885	1.30033e-63		8.84885	8.37239e-15		8.84885	0.17409
											8.86887	6.25371e-64		8.86887	6.80378e-15		8.86887	0.17538
											8.88889	3.00202e-64		8.88889	5.52523e-15		8.88889	0.17667
											8.90891	1.4384e-64		8.90891	4.48383e-15		8.90891	0.17795
											8.92893	6.87915e-65		8.92893	3.6362e-15		8.92893	0.17923
											8.94895	3.28383e-65		8.94895	2.94676e-15		8.94895	0.1805
											8.96897	1.56465e-65		8.96897	2.38639e-15		8.96897	0.18176
											8.98899	7.44124e-66		8.98899	1.93125e-15		8.98899	0.18302
											9.00901	3.53235e-66		9.00901	1.56183e-15		9.00901	0.18428
											9.02903	1.67368e-66		9.02903	1.2622e-15		9.02903	0.18553
											9.04905	7.91534e-67		9.04905	1.01934e-15		9.04905	0.18677
											9.06907	3.73645e-67		9.06907	8.22646e-16		9.06907	0.18801
											9.08909	1.76051e-67		9.08909	6.63444e-16		9.08909	0.18923
											9.10911	8.27957e-68		9.10911	5.34681e-16		9.10911	0.19046
											9.12913	3.88658e-68		9.12913	4.30611e-16		9.12913	0.19167
											9.14915	1.82104e-68		9.14915	3.46557e-16		9.14915	0.19288
											9.16917	8.51646e-69		9.16917	2.78716e-16		9.16917	0.19408
											9.18919	3.97549e-69		9.18919	2.24001e-16		9.18919	0.19527
											9.20921	1.8523e-69		9.20921	1.79902e-16		9.20921	0.19645
											9.22923	8.61439e-70		9.22923	1.44385e-16		9.22923	0.19763
											9.24925	3.99877e-70		9.24925	1.158e-16		9.24925	0.19879
											9.26927	1.85276e-70		9.26927	9.28091e-17		9.26927	0.19995
											9.28929	8.56846e-71		9.28929	7.43317e-17		9.28929	0.2011
											9.30931	3.95527e-71		9.30931	5.94917e-17		9.30931	0.20224
											9.32933	1.82239e-71		9.32933	4.75814e-17		9.32933	0.20337
											9.34935	8.38099e-72		9.34935	3.80293e-17		9.34935	0.20449
											9.36937	3.84716e-72		9.36937	3.03737e-17		9.36937	0.20559
											9.38939	1.76269e-72		9.38939	2.42425e-17		9.38939	0.20669
											9.40941	8.06123e-73		9.40941	1.93355e-17		9.40941	0.20778
											9.42943	3.67974e-73		9.42943	1.5411e-17		9.42943	0.20886
											9.44945	1.67658e-73		9.44945	1.22746e-17		9.44945	0.20993
											9.46947	7.62466e-74		9.46947	9.76977e-18		9.46947	0.21098
											9.48949	3.46105e-74		9.48949	7.77068e-18		9.48949	0.21203
											9.50951	1.56814e-74		9.50951	6.17636e-18		9.50951	0.21306
											9.52953	7.09175e-75		9.52953	4.90575e-18		9.52953	0.21408
											9.54955	3.20119e-75		9.54955	3.89384e-18		9.54955	0.21509
											9.56957	1.44232e-75		9.56957	3.08851e-18		9.56957	0.21608
											9.58959	6.48635e-76		9.58959	2.44805e-18		9.58959	0.21707
											9.60961	2.91159e-76		9.60961	1.93905e-18		9.60961	0.21804
											9.62963	1.30452e-76		9.62963	1.53482e-18		9.62963	0.21899
											9.64965	5.83392e-77		9.64965	1.21402e-18		9.64965	0.21994
											9.66967	2.60412e-77		9.66967	9.59606e-19		9.66967	0.22087
											9.68969	1.16025e-77		9.68969	7.57983e-19		9.68969	0.22179
											9.70971	5.15981e-78		9.70971	5.98308e-19		9.70971	0.22269
											9.72973	2.29037e-78		9.72973	4.71943e-19		9.72973	0.22358
											9.74975	1.01477e-78		9.74975	3.72009e-19		9.74975	0.22446
											9.76977	4.48767e-79		9.76977	2.93032e-19		9.76977	0.22532
											9.78979	1.98091e-79		9.78979	2.30663e-19		9.78979	0.22617
											9.80981	8.72767e-80		9.80981	1.81442e-19		9.80981	0.227
											9.82983	3.83815e-80		9.82983	1.42626e-19		9.82983	0.22782
											9.84985	1.68475e-80		9.84985	1.12036e-19		9.84985	0.22862
											9.86987	7.38145e-81		9.86987	8.79462e-20		9.86987	0.22941
											9.88989	3.22802e-81		9.88989	6.89882e-20		9.88989	0.23018
											9.90991	1.40904e-81		9.90991	5.40794e-20		9.90991	0.23093
											9.92993	6.13901e-82		9.92993	4.23631e-20		9.92993	0.23167
											9.94995	2.66971e-82		9.94995	3.31622e-20		9.94995	0.2324
											9.96997	1.15884e-82		9.96997	2.59417e-20		9.96997	0.23311
											9.98999	5.02075e-83		9.98999	2.02792e-20		9.98999	0.2338
											10.01	2.17123e-83		10.01	1.58418e-20		10.01	0.23447
											10.03	9.37205e-84		10.03	1.23668e-20		10.03	0.23513
											10.0501	4.03788e-84		10.0501	9.64732e-21		10.0501	0.23577
											10.0701	1.73645e-84		10.0701	7.52068e-21		10.0701	0.2364
											10.0901	7.45351e-85		10.0901	5.85877e-21		10.0901	0.23701
											10.1101	3.19338e-85		10.1101	4.56095e-21		10.1101	0.2376
											10.1301	1.36562e-85		10.1301	3.54815e-21		10.1301	0.23817
											10.1502	5.82909e-86		10.1502	2.75835e-21		10.1502	0.23873
											10.1702	2.48349e-86		10.1702	2.14287e-21		10.1702	0.23926
											10.1902	1.05612e-86		10.1902	1.66357e-21		10.1902	0.23978
											10.2102	4.48285e-87		10.2102	1.29058e-21		10.2102	0.24029
											10.2302	1.89927e-87		10.2302	1.00053e-21		10.2302	0.24077
											10.2502	8.03173e-88		10.2502	7.75123e-22		10.2502	0.24124
											10.2703	3.39017e-88		10.2703	6.00084e-22		10.2703	0.24169
											10.2903	1.42832e-88		10.2903	4.64251e-22		10.2903	0.24212
											10.3103	6.00646e-89		10.3103	3.58916e-22		10.3103	0.24253
											10.3303	2.52117e-89		10.3303	2.77289e-22		10.3303	0.24292
											10.3504	1.05628e-89		10.3504	2.14077e-22		10.3504	0.2433
											10.3704	4.41715e-90		10.3704	1.65161e-22		10.3704	0.24365
											10.3904	1.84373e-90		10.3904	1.27334e-22		10.3904	0.24399
											10.4104	7.68144e-91		10.4104	9.81026e-23		10.4104	0.24431
											10.4304	3.19432e-91		10.4304	7.55293e-23		10.4304	0.24461
											10.4505	1.32588e-91		10.4505	5.81098e-23		10.4505	0.24489
											10.4705	5.49315e-92		10.4705	4.46769e-23		10.4705	0.24515
											10.4905	2.27158e-92		10.4905	3.43254e-23		10.4905	0.2454
											10.5105	9.37619e-93		10.5105	2.6354e-23		10.5105	0.24562
											10.5305	3.86291e-93		10.5305	2.02198e-23		10.5305	0.24582
											10.5505	1.58852e-93		10.5505	1.55027e-23		10.5505	0.24601
											10.5706	6.52021e-94		10.5706	1.18778e-23		10.5706	0.24617
											10.5906	2.67129e-94		10.5906	9.0942e-24		10.5906	0.24632
											10.6106	1.09237e-94		10.6106	6.95812e-24		10.6106	0.24645
											10.6306	4.45872e-95		10.6306	5.32008e-24		10.6306	0.24656
											10.6507	1.81652e-95		10.6507	4.06485e-24		10.6507	0.24664
											10.6707	7.38689e-96		10.6707	3.10362e-24		10.6707	0.24671
											10.6907	2.99828e-96		10.6907	2.36806e-24		10.6907	0.24676
											10.7107	1.21471e-96		10.7107	1.80558e-24		10.7107	0.24679
											10.7307	4.91209e-97		10.7307	1.37575e-24		10.7307	0.2468
											10.7508	1.98266e-97		10.7508	1.04751e-24		10.7508	0.24679
											10.7708	7.98769e-98		10.7708	7.9704e-25		10.7708	0.24676
											10.7908	3.21207e-98		10.7908	6.06038e-25		10.7908	0.24672
											10.8108	1.28925e-98		10.8108	4.60489e-25		10.8108	0.24665
											10.8308	5.16514e-99		10.8308	3.49653e-25		10.8308	0.24656
											10.8508	2.06546e-99		10.8508	2.6531e-25		10.8508	0.24646
											10.8709	8.24406e-100		10.8709	2.01173e-25		10.8709	0.24633
											10.8909	3.2844e-100		10.8909	1.52435e-25		10.8909	0.24618
											10.9109	1.30606e-100		10.9109	1.15425e-25		10.9109	0.24602
											10.9309	5.18391e-101		10.9309	8.73402e-26		10.9309	0.24584
											10.951	2.05373e-101		10.951	6.60431e-26		10.951	0.24563
											10.971	8.12121e-102		10.971	4.99045e-26		10.971	0.24541
											10.991	3.20544e-102		10.991	3.76835e-26		10.991	0.24517
											11.011	1.26283e-102		11.011	2.84355e-26		11.011	0.24491
											11.031	4.96585e-103		11.031	2.14423e-26		11.031	0.24463
											11.0511	1.94909e-103		11.0511	1.61577e-26		11.0511	0.24433
											11.0711	7.6359e-104		11.0711	1.21671e-26		11.0711	0.24401
											11.0911	2.98593e-104		11.0911	9.15576e-27		11.0911	0.24368
											11.1111	1.16544e-104		11.1111	6.88495e-27		11.1111	0.24332
											11.1311	4.54035e-105		11.1311	5.17376e-27		11.1311	0.24295
											11.1511	1.76555e-105		11.1511	3.88517e-27		11.1511	0.24256
											11.1712	6.85267e-106		11.1712	2.91551e-27		11.1712	0.24215
											11.1912	2.6548e-106		11.1912	2.18634e-27		11.1912	0.24172
											11.2112	1.02658e-106		11.2112	1.6384e-27		11.2112	0.24127
											11.2312	3.96227e-107		11.2312	1.22693e-27		11.2312	0.2408
											11.2513	1.52646e-107		11.2513	9.18164e-28		11.2513	0.24032
											11.2713	5.86975e-108		11.2713	6.86625e-28		11.2713	0.23982
											11.2913	2.2529e-108		11.2913	5.13119e-28		11.2913	0.2393
											11.3113	8.6309e-109		11.3113	3.83192e-28		11.3113	0.23876
											11.3313	3.30035e-109		11.3313	2.85965e-28		11.3313	0.23821
											11.3514	1.25966e-109		11.3514	2.1326e-28		11.3514	0.23764
											11.3714	4.79887e-110		11.3714	1.58929e-28		11.3714	0.23705
											11.3914	1.8248e-110		11.3914	1.18358e-28		11.3914	0.23644
											11.4114	6.92596e-111		11.4114	8.8083e-29		11.4114	0.23582
											11.4314	2.62383e-111		11.4314	6.55065e-29		11.4314	0.23518
											11.4514	9.9216e-112		11.4514	4.86829e-29		11.4514	0.23452
											11.4715	3.74471e-112		11.4715	3.61549e-29		11.4715	0.23384
											11.4915	1.41074e-112		11.4915	2.68323e-29		11.4915	0.23315
											11.5115	5.30473e-113		11.5115	1.98997e-29		11.5115	0.23245
											11.5315	1.991e-113		11.5315	1.47481e-29		11.5315	0.23172
											11.5516	7.45881e-114		11.5516	1.09225e-29		11.5516	0.23098
											11.5716	2.78906e-114		11.5716	8.08369e-30		11.5716	0.23023
											11.5916	1.04097e-114		11.5916	5.97855e-30		11.5916	0.22946
											11.6116	3.87799e-115		11.6116	4.41856e-30		11.6116	0.22867
											11.6316	1.442e-115		11.6316	3.26336e-30		11.6316	0.22787
											11.6517	5.35201e-116		11.6517	2.40851e-30		11.6517	0.22706
											11.6717	1.9827e-116		11.6717	1.77636e-30		11.6717	0.22622
											11.6917	7.33143e-117		11.6917	1.30922e-30		11.6917	0.22538
											11.7117	2.70589e-117		11.7117	9.64258e-31		11.7117	0.22452
											11.7317	9.96832e-118		11.7317	7.09697e-31		11.7317	0.22364
											11.7517	3.66542e-118		11.7517	5.21978e-31		11.7517	0.22275
											11.7718	1.34529e-118		11.7718	3.83646e-31		11.7718	0.22185
											11.7918	4.92833e-119		11.7918	2.81779e-31		11.7918	0.22093
											11.8118	1.80208e-119		11.8118	2.06816e-31		11.8118	0.22
											11.8318	6.57714e-120		11.8318	1.51691e-31		11.8318	0.21906
											11.8519	2.39603e-120		11.8519	1.11182e-31		11.8519	0.2181
											11.8719	8.71236e-121		11.8719	8.14347e-32		11.8719	0.21713
											11.8919	3.16207e-121		11.8919	5.9605e-32		11.8919	0.21615
											11.9119	1.1455e-121		11.9119	4.35968e-32		11.9119	0.21516
											11.9319	4.14202e-122		11.9319	3.18659e-32		11.9319	0.21415
											11.952	1.49492e-122		11.952	2.32754e-32		11.952	0.21313
											11.972	5.38537e-123		11.972	1.6989e-32		11.972	0.2121
											11.992	1.93643e-123		11.992	1.23918e-32		11.992	0.21105
											12.012	6.94992e-124		12.012	9.03242e-33		12.012	0.21
											12.032	2.4897e-124		12.032	6.57918e-33		12.032	0.20893
											12.052	8.90237e-125		12.052	4.78892e-33		12.052	0.20786
											12.0721	3.17727e-125		12.0721	3.4834e-33		12.0721	0.20677
											12.0921	1.13186e-125		12.0921	2.53203e-33		12.0921	0.20567
											12.1121	4.0246e-126		12.1121	1.83921e-33		12.1121	0.20456
											12.1321	1.42838e-126		12.1321	1.33504e-33		12.1321	0.20344
											12.1522	5.06003e-127		12.1522	9.68406e-34		12.1522	0.20231
											12.1722	1.78918e-127		12.1722	7.0197e-34		12.1722	0.20118
											12.1922	6.31458e-128		12.1922	5.08486e-34		12.1922	0.20003
											12.2122	2.22447e-128		12.2122	3.68077e-34		12.2122	0.19887
											12.2322	7.82164e-129		12.2322	2.66255e-34		12.2322	0.19771
											12.2523	2.74511e-129		12.2523	1.92467e-34		12.2523	0.19653
											12.2723	9.6164e-130		12.2723	1.39031e-34		12.2723	0.19535
											12.2923	3.36245e-130		12.2923	1.00362e-34		12.2923	0.19416
											12.3123	1.17352e-130		12.3123	7.23977e-35		12.3123	0.19296
											12.3323	4.08802e-131		12.3323	5.21891e-35		12.3323	0.19175
											12.3523	1.42144e-131		12.3523	3.75953e-35		12.3523	0.19054
											12.3724	0		12.3724	2.70636e-35		12.3724	0.18932
											12.3924	0		12.3924	1.94688e-35		12.3924	0.18809
											12.4124	0		12.4124	1.39955e-35		12.4124	0.18685
											12.4324	0		12.4324	1.0054e-35		12.4324	0.18561
											12.4525	0		12.4525	7.21754e-36		12.4525	0.18437
											12.4725	0		12.4725	5.17771e-36		12.4725	0.18311
											12.4925	0		12.4925	3.71181e-36		12.4925	0.18185
											12.5125	0		12.5125	2.65909e-36		12.5125	0.18059
											12.5325	0		12.5325	1.90361e-36		12.5325	0.17931
											12.5526	0		12.5526	1.36183e-36		12.5526	0.17804
											12.5726	0		12.5726	9.73574e-37		12.5726	0.17676
											12.5926	0		12.5926	6.95525e-37		12.5926	0.17547
											12.6126	0		12.6126	4.96541e-37		12.6126	0.17418
											12.6326	0		12.6326	3.5424e-37		12.6326	0.17289
											12.6526	0		12.6526	2.52545e-37		12.6526	0.17159
											12.6727	0		12.6727	1.7992e-37		12.6727	0.17029
											12.6927	0		12.6927	1.28091e-37		12.6927	0.16898
											12.7127	0		12.7127	9.1129e-38		12.7127	0.16768
											12.7327	0		12.7327	6.47879e-38		12.7327	0.16636
											12.7528	0		12.7528	4.60289e-38		12.7528	0.16505
											12.7728	0		12.7728	3.26789e-38		12.7728	0.16373
											12.7928	0		12.7928	2.31847e-38		12.7928	0.16242
											12.8128	0		12.8128	1.64375e-38		12.8128	0.16109
											12.8328	0		12.8328	1.16458e-38		12.8328	0.15977
											12.8529	0		12.8529	8.24523e-39		12.8529	0.15845
											12.8729	0		12.8729	5.83357e-39		12.8729	0.15712
											12.8929	0		12.8929	4.12444e-39		12.8929	0.15579
											12.9129	0		12.9129	2.91404e-39		12.9129	0.15447
											12.9329	0		12.9329	2.05743e-39		12.9329	0.15314
											12.9529	0		12.9529	1.45162e-39		12.9529	0.15181
											12.973	0		12.973	1.02348e-39		12.973	0.15048
											12.993	0		12.993	7.2112e-40		12.993	0.14915
											13.013	0		13.013	5.0773e-40		13.013	0.14782
											13.033	0		13.033	3.57238e-40		13.033	0.14649
											13.0531	0		13.0531	2.51178e-40		13.0531	0.14516
											13.0731	0		13.0731	1.76484e-40		13.0731	0.14383
											13.0931	0		13.0931	1.23916e-40		13.0931	0.1425
											13.1131	0		13.1131	8.6946e-41		13.1131	0.14118
											13.1331	0		13.1331	6.09636e-41		13.1331	0.13985
											13.1532	0		13.1532	4.2716e-41		13.1532	0.13853
											13.1732	0		13.1732	2.99095e-41		13.1732	0.13721
											13.1932	0		13.1932	2.0928e-41		13.1932	0.13589
											13.2132	0		13.2132	1.46334e-41		13.2132	0.13457
											13.2332	0		13.2332	1.0225e-41		13.2332	0.13325
											13.2532	0		13.2532	7.13966e-42		13.2532	0.13194
											13.2733	0		13.2733	4.98187e-42		13.2733	0.13063
											13.2933	0		13.2933	3.47381e-42		13.2933	0.12932
											13.3133	0		13.3133	2.42058e-42		13.3133	0.12802
											13.3333	0		13.3333	1.68551e-42		13.3333	0.12671
											13.3534	0		13.3534	1.17285e-42		13.3534	0.12542
											13.3734	0		13.3734	8.15557e-43		13.3734	0.12412
											13.3934	0		13.3934	5.66714e-43		13.3934	0.12283
											13.4134	0		13.4134	3.93525e-43		13.4134	0.12154
											13.4334	0		13.4334	2.73074e-43		13.4334	0.12026
											13.4535	0		13.4535	1.8936e-43		13.4535	0.11898
											13.4735	0		13.4735	1.31218e-43		13.4735	0.11771
											13.4935	0		13.4935	9.08657e-44		13.4935	0.11644
											13.5135	0		13.5135	6.28789e-44		13.5135	0.11517
											13.5335	0		13.5335	4.34819e-44		13.5335	0.11391
											13.5535	0		13.5535	3.00477e-44		13.5535	0.11265
											13.5736	0		13.5736	2.07498e-44		13.5736	0.1114
											13.5936	0		13.5936	1.43191e-44		13.5936	0.11016
											13.6136	0		13.6136	9.87452e-45		13.6136	0.10892
											13.6336	0		13.6336	6.8048e-45		13.6336	0.10768
											13.6537	0		13.6537	4.68613e-45		13.6537	0.10645
											13.6737	0		13.6737	3.22487e-45		13.6737	0.10523
											13.6937	0		13.6937	2.21773e-45		13.6937	0.10401
											13.7137	0		13.7137	1.52407e-45		13.7137	0.1028
											13.7337	0		13.7337	1.04665e-45		13.7337	0.10159
											13.7538	0		13.7538	7.18283e-46		13.7538	0.10039
											13.7738	0		13.7738	4.92594e-46		13.7738	0.0992
											13.7938	0		13.7938	3.37584e-46		13.7938	0.09801
											13.8138	0		13.8138	2.31193e-46		13.8138	0.09683
											13.8338	0		13.8338	1.58221e-46		13.8338	0.09566
											13.8538	0		13.8538	1.08207e-46		13.8538	0.09449
											13.8739	0		13.8739	7.39512e-47		13.8739	0.09333
											13.8939	0		13.8939	5.05049e-47		13.8939	0.09218
											13.9139	0		13.9139	3.44684e-47		13.9139	0.09103
											13.9339	0		13.9339	2.35076e-47		13.9339	0.0899
											13.954	0		13.954	1.60212e-47		13.954	0.08876
											13.974	0		13.974	1.09114e-47		13.974	0.08764
											13.994	0		13.994	7.42616e-48		13.994	0.08652
											14.014	0		14.014	5.05066e-48		14.014	0.08541
											14.034	0		14.034	3.43266e-48		14.034	0.08431
											14.0541	0		14.0541	2.33138e-48		14.0541	0.08322
											14.0741	0		14.0741	1.58232e-48		14.0741	0.08213
											14.0941	0		14.0941	1.07318e-48		14.0941	0.08105
											14.1141	0		14.1141	7.27367e-49		14.1141	0.07998
											14.1341	0		14.1341	4.92642e-49		14.1341	0.07892
											14.1541	0		14.1541	3.33434e-49		14.1541	0.07787
											14.1742	0		14.1742	2.25521e-49		14.1742	0.07682
											14.1942	0		14.1942	1.52427e-49		14.1942	0.07578
											14.2142	0		14.2142	1.02953e-49		14.2142	0.07475
											14.2342	0		14.2342	6.94883e-50		14.2342	0.07373
											14.2543	0		14.2543	4.68689e-50		14.2543	0.07271
											14.2743	0		14.2743	3.15906e-50		14.2743	0.07171
											14.2943	0		14.2943	2.12779e-50		14.2943	0.07071
											14.3143	0		14.3143	1.43219e-50		14.3143	0.06972
											14.3343	0		14.3343	9.6332e-51		14.3343	0.06874
											14.3544	0		14.3544	6.475e-51		14.3544	0.06777
											14.3744	0		14.3744	4.34919e-51		14.3744	0.0668
											14.3944	0		14.3944	2.91928e-51		14.3944	0.06585
											14.4144	0		14.4144	1.95813e-51		14.4144	0.0649
											14.4344	0		14.4344	1.31253e-51		14.4344	0.06396
											14.4544	0		14.4544	8.7917e-52		14.4544	0.06303
											14.4745	0		14.4745	5.88487e-52		14.4745	0.06211
											14.4945	0		14.4945	3.93641e-52		14.4945	0.0612
											14.5145	0		14.5145	2.63125e-52		14.5145	0.0603
											14.5345	0		14.5345	1.75762e-52		14.5345	0.0594
											14.5546	0		14.5546	1.17324e-52		14.5546	0.05852
											14.5746	0		14.5746	7.82609e-53		14.5746	0.05764
											14.5946	0		14.5946	5.2168e-53		14.5946	0.05677
											14.6146	0		14.6146	3.47506e-53		14.6146	0.05591
											14.6346	0		14.6346	2.31323e-53		14.6346	0.05506
											14.6547	0		14.6547	1.53878e-53		14.6547	0.05421
											14.6747	0		14.6747	1.0229e-53		14.6747	0.05338
											14.6947	0		14.6947	6.79496e-54		14.6947	0.05255
											14.7147	0		14.7147	4.51067e-54		14.7147	0.05174
											14.7347	0		14.7347	2.99222e-54		14.7347	0.05093
											14.7547	0		14.7547	1.98356e-54		14.7547	0.05013
											14.7748	0		14.7748	1.31401e-54		14.7748	0.04934
											14.7948	0		14.7948	8.69858e-55		14.7948	0.04856
											14.8148	0		14.8148	5.75437e-55		14.8148	0.04778
											14.8348	0		14.8348	3.80406e-55		14.8348	0.04702
											14.8549	0		14.8549	2.51301e-55		14.8549	0.04626
											14.8749	0		14.8749	1.65898e-55		14.8749	0.04551
											14.8949	0		14.8949	1.09443e-55		14.8949	0.04477
											14.9149	0		14.9149	7.21496e-56		14.9149	0.04404
											14.9349	0		14.9349	4.75312e-56		14.9349	0.04332
											14.955	0		14.955	3.12912e-56		14.955	0.04261
											14.975	0		14.975	2.05857e-56		14.975	0.0419
											14.995	0		14.995	1.35334e-56		14.995	0.04121
											15.015	0		15.015	8.89097e-57		15.015	0.04052
											15.035	0		15.035	5.837e-57		15.035	0.03984
											15.0551	0		15.0551	3.82939e-57		15.0551	0.03916
											15.0751	0		15.0751	2.51054e-57		15.0751	0.0385
											15.0951	0		15.0951	1.64477e-57		15.0951	0.03785
											15.1151	0		15.1151	1.07682e-57		15.1151	0.0372
											15.1351	0		15.1351	7.04497e-58		15.1351	0.03656
											15.1552	0		15.1552	4.6059e-58		15.1552	0.03593
											15.1752	0		15.1752	3.00919e-58		15.1752	0.03531
											15.1952	0		15.1952	1.96464e-58		15.1952	0.03469
											15.2152	0		15.2152	1.28179e-58		15.2152	0.03409
											15.2352	0		15.2352	8.35694e-59		15.2352	0.03349
											15.2553	0		15.2553	5.44476e-59		15.2553	0.0329
											15.2753	0		15.2753	3.54494e-59		15.2753	0.03231
											15.2953	0		15.2953	2.30642e-59		15.2953	0.03174
											15.3153	0		15.3153	1.49957e-59		15.3153	0.03117
											15.3353	0		15.3353	9.74305e-60		15.3353	0.03061
											15.3554	0		15.3554	6.32589e-60		15.3554	0.03006
											15.3754	0		15.3754	4.10438e-60		15.3754	0.02952
											15.3954	0		15.3954	2.66117e-60		15.3954	0.02898
											15.4154	0		15.4154	1.72424e-60		15.4154	0.02845
											15.4354	0		15.4354	1.1164e-60		15.4354	0.02793
											15.4555	0		15.4555	7.22343e-61		15.4555	0.02741
											15.4755	0		15.4755	4.67052e-61		15.4755	0.02691
											15.4955	0		15.4955	3.01777e-61		15.4955	0.02641
											15.5155	0		15.5155	1.94853e-61		15.5155	0.02591
											15.5355	0		15.5355	1.25726e-61		15.5355	0.02543
											15.5556	0		15.5556	8.10671e-62		15.5556	0.02495
											15.5756	0		15.5756	5.22351e-62		15.5756	0.02448
											15.5956	0		15.5956	3.3634e-62		15.5956	0.02402
											15.6156	0		15.6156	2.16419e-62		15.6156	0.02356
											15.6356	0		15.6356	1.39159e-62		15.6356	0.02311
											15.6557	0		15.6557	8.94178e-63		15.6557	0.02267
											15.6757	0		15.6757	5.74166e-63		15.6757	0.02223
											15.6957	0		15.6957	3.68426e-63		15.6957	0.0218
											15.7157	0		15.7157	2.36245e-63		15.7157	0.02138
											15.7357	0		15.7357	1.51381e-63		15.7357	0.02096
											15.7558	0		15.7558	9.69354e-64		15.7558	0.02055
											15.7758	0		15.7758	6.20286e-64		15.7758	0.02014
											15.7958	0		15.7958	3.96643e-64		15.7958	0.01975
											15.8158	0		15.8158	2.53459e-64		15.8158	0.01936
											15.8358	0		15.8358	1.61851e-64		15.8358	0.01897
											15.8559	0		15.8559	1.03281e-64		15.8559	0.01859
											15.8759	0		15.8759	6.58605e-65		15.8759	0.01822
											15.8959	0		15.8959	4.1969e-65		15.8959	0.01785
											15.9159	0		15.9159	2.67259e-65		15.9159	0.01749
											15.9359	0		15.9359	1.70073e-65		15.9359	0.01714
											15.956	0		15.956	1.08152e-65		15.956	0.01679
											15.976	0		15.976	6.87285e-66		15.976	0.01645
											15.996	0		15.996	4.36452e-66		15.996	0.01611
											16.016	0		16.016	2.76972e-66		16.016	0.01578
											16.036	0		16.036	1.75644e-66		16.036	0.01545
											16.0561	0		16.0561	1.11309e-66		16.0561	0.01513
											16.0761	0		16.0761	7.049e-67		16.0761	0.01482
											16.0961	0		16.0961	4.46091e-67		16.0961	0.01451
											16.1161	0		16.1161	2.8211e-67		16.1161	0.0142
											16.1361	0		16.1361	1.78284e-67		16.1361	0.0139
											16.1562	0		16.1562	1.12591e-67		16.1562	0.01361
											16.1762	0		16.1762	7.10555e-68		16.1762	0.01332
											16.1962	0		16.1962	4.48114e-68		16.1962	0.01304
											16.2162	0		16.2162	2.8241e-68		16.2162	0.01276
											16.2362	0		16.2362	1.77856e-68		16.2362	0.01249
											16.2563	0		16.2563	1.11933e-68		16.2563	0.01222
											16.2763	0		16.2763	7.03957e-69		16.2763	0.01195
											16.2963	0		16.2963	4.42419e-69		16.2963	0.01169
											16.3163	0		16.3163	2.77856e-69		16.3163	0.01144
											16.3363	0		16.3363	1.74383e-69		16.3363	0.01119
											16.3564	0		16.3564	1.09368e-69		16.3564	0.01095
											16.3764	0		16.3764	6.85446e-70		16.3764	0.01071
											16.3964	0		16.3964	4.29296e-70		16.3964	0.01047
											16.4164	0		16.4164	2.68682e-70		16.4164	0.01024
											16.4364	0		16.4364	1.68043e-70		16.4364	0.01001
											16.4565	0		16.4565	1.05027e-70		16.4565	0.00979
											16.4765	0		16.4765	6.55964e-71		16.4765	0.00957
											16.4965	0		16.4965	4.0941e-71		16.4965	0.00935
											16.5165	0		16.5165	2.5535e-71		16.5165	0.00914
											16.5365	0		16.5365	1.59153e-71		16.5365	0.00894
											16.5566	0		16.5566	9.91265e-72		16.5566	0.00873
											16.5766	0		16.5766	6.16971e-72		16.5766	0.00854
											16.5966	0		16.5966	3.83742e-72		16.5966	0.00834
											16.6166	0		16.6166	2.38514e-72		16.6166	0.00815
											16.6366	0		16.6366	1.48145e-72		16.6366	0.00796
											16.6567	0		16.6567	9.19513e-73		16.6567	0.00778
											16.6767	0		16.6767	5.70334e-73		16.6767	0.0076
											16.6967	0		16.6967	3.53508e-73		16.6967	0.00742
											16.7167	0		16.7167	2.18962e-73		16.7167	0.00725
											16.7367	0		16.7367	1.35531e-73		16.7367	0.00708
											16.7568	0		16.7568	8.38311e-74		16.7568	0.00691
											16.7768	0		16.7768	5.1817e-74		16.7768	0.00675
											16.7968	0		16.7968	3.20065e-74		16.7968	0.00659
											16.8168	0		16.8168	1.97562e-74		16.8168	0.00644
											16.8368	0		16.8368	1.21862e-74		16.8368	0.00628
											16.8569	0		16.8569	7.51158e-75		16.8569	0.00613
											16.8769	0		16.8769	4.62694e-75		16.8769	0.00599
											16.8969	0		16.8969	2.8481e-75		16.8969	0.00584
											16.9169	0		16.9169	1.75193e-75		16.9169	0.0057
											16.9369	0		16.9369	1.0769e-75		16.9369	0.00557
											16.957	0		16.957	6.61509e-76		16.957	0.00543
											16.977	0		16.977	4.06064e-76		16.977	0.0053
											16.997	0		16.997	2.49087e-76		16.997	0.00517
											17.017	0		17.017	1.52689e-76		17.017	0.00504
											17.037	0		17.037	9.35329e-77		17.037	0.00492
											17.0571	0		17.0571	5.72558e-77		17.0571	0.0048
											17.0771	0		17.0771	3.50246e-77		17.0771	0.00468
											17.0971	0		17.0971	2.14105e-77		17.0971	0.00456
											17.1171	0		17.1171	1.30792e-77		17.1171	0.00445
											17.1371	0		17.1371	7.9842e-78		17.1371	0.00434
											17.1572	0		17.1572	4.8706e-78		17.1572	0.00423
											17.1772	0		17.1772	2.96915e-78		17.1772	0.00413
											17.1972	0		17.1972	1.80876e-78		17.1972	0.00402
											17.2172	0		17.2172	1.10111e-78		17.2172	0.00392
											17.2372	0		17.2372	6.69849e-79		17.2372	0.00382
											17.2573	0		17.2573	4.07215e-79		17.2573	0.00372
											17.2773	0		17.2773	2.47383e-79		17.2773	0.00363
											17.2973	0		17.2973	1.50181e-79		17.2973	0.00354
											17.3173	0		17.3173	9.11084e-80		17.3173	0.00345
											17.3373	0		17.3373	5.52334e-80		17.3373	0.00336
											17.3574	0		17.3574	3.34614e-80		17.3574	0.00327
											17.3774	0		17.3774	2.02575e-80		17.3774	0.00319
											17.3974	0		17.3974	1.22554e-80		17.3974	0.0031
											17.4174	0		17.4174	7.40911e-81		17.4174	0.00302
											17.4374	0		17.4374	4.47615e-81		17.4374	0.00295
											17.4575	0		17.4575	2.70236e-81		17.4575	0.00287
											17.4775	0		17.4775	1.63035e-81		17.4775	0.00279
											17.4975	0		17.4975	9.82916e-82		17.4975	0.00272
											17.5175	0		17.5175	5.92178e-82		17.5175	0.00265
											17.5375	0		17.5375	3.56523e-82		17.5375	0.00258
											17.5576	0		17.5576	2.14497e-82		17.5576	0.00251
											17.5776	0		17.5776	1.2896e-82		17.5776	0.00244
											17.5976	0		17.5976	7.74794e-83		17.5976	0.00238
											17.6176	0		17.6176	4.65176e-83		17.6176	0.00231
											17.6376	0		17.6376	2.79092e-83		17.6376	0.00225
											17.6577	0		17.6577	1.67332e-83		17.6577	0.00219
											17.6777	0		17.6777	1.00255e-83		17.6777	0.00213
											17.6977	0		17.6977	6.00253e-84		17.6977	0.00207
											17.7177	0		17.7177	3.59138e-84		17.7177	0.00202
											17.7377	0		17.7377	2.14728e-84		17.7377	0.00196
											17.7578	0		17.7578	1.28296e-84		17.7578	0.00191
											17.7778	0		17.7778	7.66016e-85		17.7778	0.00186
											17.7978	0		17.7978	4.57048e-85		17.7978	0.00181
											17.8178	0		17.8178	2.72511e-85		17.8178	0.00176
											17.8378	0		17.8378	1.6237e-85		17.8378	0.00171
											17.8579	0		17.8579	9.66781e-86		17.8579	0.00166
											17.8779	0		17.8779	5.75239e-86		17.8779	0.00162
											17.8979	0		17.8979	3.42033e-86		17.8979	0.00157
											17.9179	0		17.9179	2.03229e-86		17.9179	0.00153
											17.9379	0		17.9379	1.20671e-86		17.9379	0.00148
											17.958	0		17.958	7.16014e-87		17.958	0.00144
											17.978	0		17.978	4.24559e-87		17.978	0.0014
											17.998	0		17.998	2.51567e-87		17.998	0.00136
											18.018	0		18.018	1.48959e-87		18.018	0.00132
											18.038	0		18.038	8.81416e-88		18.038	0.00129
											18.0581	0		18.0581	5.21187e-88		18.0581	0.00125
											18.0781	0		18.0781	3.07968e-88		18.0781	0.00121
											18.0981	0		18.0981	1.81851e-88		18.0981	0.00118
											18.1181	0		18.1181	1.07307e-88		18.1181	0.00115
											18.1381	0		18.1381	6.32756e-89		18.1381	0.00111
											18.1582	0		18.1582	3.72859e-89		18.1582	0.00108
											18.1782	0		18.1782	2.1956e-89		18.1782	0.00105
											18.1982	0		18.1982	1.29199e-89		18.1982	0.00102
											18.2182	0		18.2182	7.59741e-90		18.2182	0.000989109
											18.2382	0		18.2382	4.46448e-90		18.2382	0.0009603
											18.2583	0		18.2583	2.62165e-90		18.2583	0.000932257
											18.2783	0		18.2783	1.53843e-90		18.2783	0.000904961
											18.2983	0		18.2983	9.02155e-91		18.2983	0.000878396
											18.3183	0		18.3183	5.28668e-91		18.3183	0.000852542
											18.3383	0		18.3383	3.09588e-91		18.3383	0.000827385
											18.3584	0		18.3584	1.81169e-91		18.3584	0.000802906
											18.3784	0		18.3784	1.05946e-91		18.3784	0.00077909
											18.3984	0		18.3984	6.19129e-92		18.3984	0.000755921
											18.4184	0		18.4184	3.61559e-92		18.4184	0.000733383
											18.4384	0		18.4384	2.10997e-92		18.4384	0.000711461
											18.4585	0		18.4585	1.23047e-92		18.4585	0.000690139
											18.4785	0		18.4785	7.17078e-93		18.4785	0.000669404
											18.4985	0		18.4985	4.176e-93		18.4985	0.000649241
											18.5185	0		18.5185	2.43027e-93		18.5185	0.000629635
											18.5385	0		18.5385	1.41334e-93		18.5385	0.000610573
											18.5586	0		18.5586	8.21368e-94		18.5586	0.000592041
											18.5786	0		18.5786	4.77011e-94		18.5786	0.000574027
											18.5986	0		18.5986	2.76834e-94		18.5986	0.000556516
											18.6186	0		18.6186	1.60549e-94		18.6186	0.000539498
											18.6386	0		18.6386	9.30456e-95		18.6386	0.000522958
											18.6587	0		18.6587	5.38869e-95		18.6587	0.000506885
											18.6787	0		18.6787	3.11867e-95		18.6787	0.000491268
											18.6987	0		18.6987	1.80366e-95		18.6987	0.000476094
											18.7187	0		18.7187	1.04241e-95		18.7187	0.000461353
											18.7387	0		18.7387	6.02039e-96		18.7387	0.000447033
											18.7588	0		18.7588	3.47462e-96		18.7588	0.000433123
											18.7788	0		18.7788	2.00396e-96		18.7788	0.000419612
											18.7988	0		18.7988	1.15497e-96		18.7988	0.000406491
											18.8188	0		18.8188	6.652e-97		18.8188	0.00039375
											18.8388	0		18.8388	3.82853e-97		18.8388	0.000381377
											18.8589	0		18.8589	2.20197e-97		18.8589	0.000369364
											18.8789	0		18.8789	1.26558e-97		18.8789	0.000357701
											18.8989	0		18.8989	7.26886e-98		18.8989	0.00034638
											18.9189	0		18.9189	4.17198e-98		18.9189	0.00033539
											18.9389	0		18.9389	2.39287e-98		18.9389	0.000324723
											18.959	0		18.959	1.37149e-98		18.959	0.00031437
											18.979	0		18.979	7.85537e-99		18.979	0.000304324
											18.999	0		18.999	4.49614e-99		18.999	0.000294575
											19.019	0		19.019	2.57165e-99		19.019	0.000285117
											19.039	0		19.039	1.46988e-99		19.039	0.00027594
											19.0591	0		19.0591	8.39564e-100		19.0591	0.000267037
											19.0791	0		19.0791	4.79207e-100		19.0791	0.000258401
											19.0991	0		19.0991	2.73333e-100		19.0991	0.000250025
											19.1191	0		19.1191	1.55797e-100		19.1191	0.000241901
											19.1391	0		19.1391	8.87416e-101		19.1391	0.000234023
											19.1592	0		19.1592	5.05119e-101		19.1592	0.000226383
											19.1792	0		19.1792	2.87315e-101		19.1792	0.000218976
											19.1992	0		19.1992	1.63314e-101		19.1992	0.000211794
											19.2192	0		19.2192	9.27657e-102		19.2192	0.000204832
											19.2392	0		19.2392	5.26563e-102		19.2392	0.000198082
											19.2593	0		19.2593	2.98684e-102		19.2593	0.00019154
											19.2793	0		19.2793	1.69306e-102		19.2793	0.0001852
											19.2993	0		19.2993	9.59033e-103		19.2993	0.000179055
											19.3193	0		19.3193	5.42867e-103		19.3193	0.000173101
											19.3393	0		19.3393	3.0708e-103		19.3393	0.000167331
											19.3594	0		19.3594	1.73584e-103		19.3594	0.000161741
											19.3794	0		19.3794	9.80543e-104		19.3794	0.000156325
											19.3994	0		19.3994	5.53506e-104		19.3994	0.000151079
											19.4194	0		19.4194	3.12232e-104		19.4194	0.000145997
											19.4394	0		19.4394	1.76008e-104		19.4394	0.000141075
											19.4595	0		19.4595	9.91484e-105		19.4595	0.000136308
											19.4795	0		19.4795	5.58134e-105		19.4795	0.000131692
											19.4995	0		19.4995	3.13972e-105		19.4995	0.000127222
											19.5195	0		19.5195	1.76499e-105		19.5195	0.000122894
											19.5395	0		19.5395	9.91498e-106		19.5395	0.000118704
											19.5596	0		19.5596	5.56597e-106		19.5596	0.000114648
											19.5796	0		19.5796	3.12241e-106		19.5796	0.000110721
											19.5996	0		19.5996	1.7504e-106		19.5996	0.000106921
											19.6196	0		19.6196	9.80582e-107		19.6196	0.000103243
											19.6396	0		19.6396	5.48946e-107		19.6396	9.96838e-05
											19.6597	0		19.6597	3.07097e-107		19.6597	9.62396e-05
											19.6797	0		19.6797	1.7168e-107		19.6797	9.2907e-05
											19.6997	0		19.6997	9.59098e-108		19.6997	8.96827e-05
											19.7197	0		19.7197	5.35433e-108		19.7197	8.65635e-05
											19.7397	0		19.7397	2.98708e-108		19.7397	8.35462e-05
											19.7598	0		19.7598	1.66528e-108		19.7598	8.06277e-05
											19.7798	0		19.7798	9.27744e-109		19.7798	7.7805e-05
											19.7998	0		19.7998	5.16496e-109		19.7998	7.50752e-05
											19.8198	0		19.8198	2.87346e-109		19.8198	7.24355e-05
											19.8398	0		19.8398	1.59751e-109		19.8398	6.98831e-05
											19.8599	0		19.8599	8.87523e-110		19.8599	6.74152e-05
											19.8799	0		19.8799	4.92737e-110		19.8799	6.50294e-05
											19.8999	0		19.8999	2.7337e-110		19.8999	6.27231e-05
											19.9199	0		19.9199	1.5156e-110		19.9199	6.04938e-05
											19.9399	0		19.9399	8.39688e-111		19.9399	5.83391e-05
											19.96	0		19.96	4.6489e-111		19.96	5.62568e-05
											19.98	0		19.98	2.57207e-111		19.98	5.42444e-05
											20	0		20	1.42204e-111		20	5.23e-05

## Sheet: Figure 3E
	Figure 2E
	Average growth velocity vs average Arp2/3 complex fluorescence transit times
	Network growth velocity [um/min]	SD Network growth velocity [um/min]	average Arp2/3 complex fluorescence transit time [s]	SD average Arp2/3 complex fluorescence transit time [s]
	0.381	0.02263	10.7314	2.25336
	1.7685	0.45043	2.86314	0.76065
	7.33929	1.65449	0.99738	0.46368

## Sheet: Figure 3F
	Figure 2F
	Arp2/3 dwell time for control networks; 0 Pa growth stress			Arp2/3 dwell time for 255 Pa growth stress networks			Arp2/3 dwell time for 1020 Pa growth stress networks			Gaussian fit to Arp2/3 dwell time for control networks; 0 Pa growth stress			Gaussian fit to Arp2/3 dwell time for 255 Pa growth stress networks			Gaussian fit to main mode (partial data) of Arp2/3 dwell time for 1020 Pa growth stress networks
	Arp2/3 dwellt time; bin center [s]	Relative frequency		Arp2/3 dwell time; bin center [s]	Relative frequency		Arp2/3 dwell time; bin center [s]	Relative frequency		Arp2/3 dwell time [s]	Relative frequency		Arp2/3 dwell time [s]	Relative frequency		Arp2/3 dwell time [s]	Relative frequency
	0.375	0.01625		1	0.04377		6	0.04747		0	0.00642		1	0.00413		0	3.05782e-05
	1.125	0.06588		3	0.05724		10	0.06962		0.05005	0.00736		1.04805	0.00435		0.05005	3.14523e-05
	1.875	0.20578		5	0.07071		14	0.07278		0.1001	0.00842		1.0961	0.00457		0.1001	3.23499e-05
	2.625	0.28159		7	0.21044		18	0.11709		0.15015	0.0096		1.14414	0.0048		0.15015	3.32715e-05
	3.375	0.24639		9	0.25758		22	0.08544		0.2002	0.01093		1.19219	0.00504		0.2002	3.42178e-05
	4.125	0.1083		11	0.21886		26	0.11076		0.25025	0.01241		1.24024	0.00529		0.25025	3.51894e-05
	4.875	0.04152		13	0.05892		30	0.15823		0.3003	0.01405		1.28829	0.00555		0.3003	3.61868e-05
	5.625	0.01534		15	0.0404		34	0.12342		0.35035	0.01586		1.33634	0.00583		0.35035	3.72108e-05
	6.375	0.00361		17	0.02862		38	0.07278		0.4004	0.01787		1.38438	0.00612		0.4004	3.82619e-05
	7.125	0.00271		19	0.00673		42	0.0443		0.45045	0.02008		1.43243	0.00641		0.45045	3.93409e-05
	7.875	0.00271		21	0		46	0.00949		0.5005	0.02251		1.48048	0.00672		0.5005	4.04484e-05
	8.625	0		23	0.00168		50	0.01582		0.55055	0.02518		1.52853	0.00705		0.55055	4.15851e-05
	9.375	0.00181		25	0.00168					0.6006	0.02808		1.57658	0.00738		0.6006	4.27518e-05
	10.125	0.000902527		27	0					0.65065	0.03125		1.62462	0.00774		0.65065	4.39491e-05
	10.875	0		29	0					0.7007	0.03468		1.67267	0.0081		0.7007	4.51778e-05
	11.625	0.000902527		31	0.00168					0.75075	0.03839		1.72072	0.00848		0.75075	4.64388e-05
	12.375	0		33	0					0.8008	0.0424		1.76877	0.00887		0.8008	4.77326e-05
	13.125	0		35	0					0.85085	0.04671		1.81682	0.00928		0.85085	4.90602e-05
	13.875	0.000902527		37	0					0.9009	0.05132		1.86486	0.00971		0.9009	5.04224e-05
	14.625	0		39	0					0.95095	0.05626		1.91291	0.01015		0.95095	5.18199e-05
	15.375	0		41	0.00168					1.001	0.06151		1.96096	0.01061		1.001	5.32537e-05
	16.125	0		43	0					1.05105	0.06709		2.00901	0.01109		1.05105	5.47246e-05
	16.875	0		45	0					1.1011	0.07298		2.05706	0.01158		1.1011	5.62335e-05
	17.625	0		47	0					1.15115	0.0792		2.10511	0.0121		1.15115	5.77812e-05
	18.375	0.000902527		49	0					1.2012	0.08574		2.15315	0.01263		1.2012	5.93688e-05
	19.125	0.000902527								1.25125	0.09259		2.2012	0.01318		1.25125	6.09971e-05
	19.875	0								1.3013	0.09973		2.24925	0.01375		1.3013	6.26671e-05
	20.625	0								1.35135	0.10715		2.2973	0.01434		1.35135	6.43798e-05
	21.375	0								1.4014	0.11484		2.34535	0.01496		1.4014	6.61362e-05
	22.125	0								1.45145	0.12278		2.39339	0.01559		1.45145	6.79374e-05
	22.875	0								1.5015	0.13094		2.44144	0.01625		1.5015	6.97843e-05
	23.625	0								1.55155	0.13929		2.48949	0.01693		1.55155	7.16781e-05
	24.375	0								1.6016	0.14781		2.53754	0.01763		1.6016	7.36198e-05
	25.125	0								1.65165	0.15645		2.58559	0.01835		1.65165	7.56105e-05
	25.875	0.00181								1.7017	0.16519		2.63363	0.0191		1.7017	7.76514e-05
	26.625	0								1.75175	0.17398		2.68168	0.01988		1.75175	7.97437e-05
	27.375	0								1.8018	0.18278		2.72973	0.02068		1.8018	8.18885e-05
	28.125	0								1.85185	0.19156		2.77778	0.0215		1.85185	8.4087e-05
	28.875	0								1.9019	0.20025		2.82583	0.02235		1.9019	8.63405e-05
	29.625	0								1.95195	0.20881		2.87387	0.02323		1.95195	8.86503e-05
	30.375	0								2.002	0.2172		2.92192	0.02414		2.002	9.10175e-05
	31.125	0								2.05205	0.22536		2.96997	0.02507		2.05205	9.34435e-05
	31.875	0								2.1021	0.23324		3.01802	0.02603		2.1021	9.59298e-05
	32.625	0								2.15215	0.2408		3.06607	0.02702		2.15215	9.84775e-05
	33.375	0								2.2022	0.24799		3.11411	0.02804		2.2022	0.000101088
	34.125	0								2.25225	0.25475		3.16216	0.02908		2.25225	0.000103763
	34.875	0								2.3023	0.26105		3.21021	0.03016		2.3023	0.000106504
	35.625	0								2.35235	0.26683		3.25826	0.03127		2.35235	0.000109312
	36.375	0.000902527								2.4024	0.27207		3.30631	0.03241		2.4024	0.000112189
	37.125	0								2.45245	0.27671		3.35435	0.03358		2.45245	0.000115136
	37.875	0								2.5025	0.28074		3.4024	0.03478		2.5025	0.000118155
	38.625	0								2.55255	0.28411		3.45045	0.03602		2.55255	0.000121247
	39.375	0								2.6026	0.28681		3.4985	0.03728		2.6026	0.000124415
	40.125	0								2.65265	0.28881		3.54655	0.03858		2.65265	0.000127659
	40.875	0								2.7027	0.2901		3.59459	0.03991		2.7027	0.000130982
	41.625	0								2.75275	0.29067		3.64264	0.04128		2.75275	0.000134384
	42.375	0								2.8028	0.29051		3.69069	0.04268		2.8028	0.000137869
	43.125	0								2.85285	0.28963		3.73874	0.04411		2.85285	0.000141438
	43.875	0								2.9029	0.28804		3.78679	0.04558		2.9029	0.000145092
	44.625	0								2.95295	0.28574		3.83483	0.04709		2.95295	0.000148833
	45.375	0								3.003	0.28275		3.88288	0.04862		3.003	0.000152664
	46.125	0								3.05305	0.2791		3.93093	0.0502		3.05305	0.000156586
	46.875	0								3.1031	0.2748		3.97898	0.05181		3.1031	0.000160601
	47.625	0								3.15315	0.2699		4.02703	0.05345		3.15315	0.000164711
	48.375	0								3.2032	0.26443		4.07508	0.05513		3.2032	0.000168919
	49.125	0.000902527								3.25325	0.25842		4.12312	0.05684		3.25325	0.000173226
	49.875	0								3.3033	0.25192		4.17117	0.05859		3.3033	0.000177635
										3.35335	0.24497		4.21922	0.06038		3.35335	0.000182147
										3.4034	0.23762		4.26727	0.0622		3.4034	0.000186765
										3.45345	0.22991		4.31532	0.06406		3.45345	0.000191491
										3.5035	0.2219		4.36336	0.06595		3.5035	0.000196327
										3.55355	0.21364		4.41141	0.06788		3.55355	0.000201276
										3.6036	0.20517		4.45946	0.06984		3.6036	0.000206341
										3.65365	0.19655		4.50751	0.07184		3.65365	0.000211522
										3.7037	0.18782		4.55556	0.07387		3.7037	0.000216824
										3.75375	0.17903		4.6036	0.07594		3.75375	0.000222248
										3.8038	0.17022		4.65165	0.07804		3.8038	0.000227797
										3.85385	0.16145		4.6997	0.08017		3.85385	0.000233473
										3.9039	0.15274		4.74775	0.08234		3.9039	0.00023928
										3.95395	0.14415		4.7958	0.08454		3.95395	0.00024522
										4.004	0.1357		4.84384	0.08678		4.004	0.000251295
										4.05405	0.12743		4.89189	0.08904		4.05405	0.000257509
										4.1041	0.11936		4.93994	0.09134		4.1041	0.000263864
										4.15415	0.11153		4.98799	0.09367		4.15415	0.000270363
										4.2042	0.10395		5.03604	0.09603		4.2042	0.000277009
										4.25425	0.09664		5.08408	0.09842		4.25425	0.000283805
										4.3043	0.08963		5.13213	0.10083		4.3043	0.000290755
										4.35435	0.08291		5.18018	0.10328		4.35435	0.00029786
										4.4044	0.07651		5.22823	0.10575		4.4044	0.000305125
										4.45445	0.07043		5.27628	0.10825		4.45445	0.000312552
										4.5045	0.06466		5.32432	0.11077		4.5045	0.000320145
										4.55455	0.05923		5.37237	0.11332		4.55455	0.000327907
										4.6046	0.05411		5.42042	0.11589		4.6046	0.000335841
										4.65465	0.04931		5.46847	0.11849		4.65465	0.000343952
										4.7047	0.04483		5.51652	0.1211		4.7047	0.000352241
										4.75475	0.04065		5.56456	0.12374		4.75475	0.000360714
										4.8048	0.03677		5.61261	0.12639		4.8048	0.000369372
										4.85485	0.03318		5.66066	0.12907		4.85485	0.000378221
										4.9049	0.02986		5.70871	0.13176		4.9049	0.000387264
										4.95495	0.02681		5.75676	0.13446		4.95495	0.000396504
										5.00501	0.02401		5.8048	0.13718		5.00501	0.000405946
										5.05506	0.02145		5.85285	0.13991		5.05506	0.000415593
										5.10511	0.01911		5.9009	0.14266		5.10511	0.000425449
										5.15516	0.01699		5.94895	0.14541		5.15516	0.000435519
										5.20521	0.01506		5.997	0.14817		5.20521	0.000445806
										5.25526	0.01332		6.04505	0.15093		5.25526	0.000456314
										5.30531	0.01176		6.09309	0.15371		5.30531	0.000467048
										5.35536	0.01035		6.14114	0.15648		5.35536	0.000478012
										5.40541	0.00908		6.18919	0.15926		5.40541	0.000489211
										5.45546	0.00795		6.23724	0.16204		5.45546	0.000500648
										5.50551	0.00695		6.28529	0.16481		5.50551	0.000512329
										5.55556	0.00605		6.33333	0.16759		5.55556	0.000524258
										5.60561	0.00526		6.38138	0.17035		5.60561	0.000536439
										5.65566	0.00456		6.42943	0.17312		5.65566	0.000548877
										5.70571	0.00394		6.47748	0.17587		5.70571	0.000561578
										5.75576	0.0034		6.52553	0.17861		5.75576	0.000574545
										5.80581	0.00293		6.57357	0.18134		5.80581	0.000587784
										5.85586	0.00251		6.62162	0.18406		5.85586	0.0006013
										5.90591	0.00215		6.66967	0.18676		5.90591	0.000615098
										5.95596	0.00184		6.71772	0.18944		5.95596	0.000629183
										6.00601	0.00157		6.76577	0.1921		6.00601	0.00064356
										6.05606	0.00133		6.81381	0.19474		6.05606	0.000658235
										6.10611	0.00113		6.86186	0.19736		6.10611	0.000673212
										6.15616	0.000954174		6.90991	0.19995		6.15616	0.000688498
										6.20621	0.000804866		6.95796	0.20252		6.20621	0.000704099
										6.25626	0.00067723		7.00601	0.20505		6.25626	0.000720018
										6.30631	0.000568415		7.05405	0.20755		6.30631	0.000736264
										6.35636	0.000475895		7.1021	0.21003		6.35636	0.00075284
										6.40641	0.000397442		7.15015	0.21246		6.40641	0.000769753
										6.45646	0.000331095		7.1982	0.21486		6.45646	0.000787009
										6.50651	0.000275136		7.24625	0.21722		6.50651	0.000804615
										6.55656	0.000228066		7.29429	0.21954		6.55656	0.000822575
										6.60661	0.000188577		7.34234	0.22182		6.60661	0.000840897
										6.65666	0.000155537		7.39039	0.22405		6.65666	0.000859587
										6.70671	0.000127966		7.43844	0.22624		6.70671	0.00087865
										6.75676	0.000105021		7.48649	0.22838		6.75676	0.000898095
										6.80681	8.59744e-05		7.53453	0.23047		6.80681	0.000917926
										6.85686	7.02071e-05		7.58258	0.2325		6.85686	0.000938151
										6.90691	5.71885e-05		7.63063	0.23449		6.90691	0.000958777
										6.95696	4.6468e-05		7.67868	0.23642		6.95696	0.000979811
										7.00701	3.7663e-05		7.72673	0.23829		7.00701	0.001
										7.05706	3.04504e-05		7.77477	0.24011		7.05706	0.00102
										7.10711	2.45577e-05		7.82282	0.24186		7.10711	0.00105
										7.15716	1.9756e-05		7.87087	0.24356		7.15716	0.00107
										7.20721	1.58535e-05		7.91892	0.24519		7.20721	0.00109
										7.25726	1.26902e-05		7.96697	0.24676		7.25726	0.00111
										7.30731	1.01328e-05		8.01502	0.24827		7.30731	0.00114
										7.35736	8.07065e-06		8.06306	0.2497		7.35736	0.00116
										7.40741	6.41213e-06		8.11111	0.25107		7.40741	0.00119
										7.45746	5.08174e-06		8.15916	0.25237		7.45746	0.00121
										7.50751	4.01735e-06		8.20721	0.2536		7.50751	0.00124
										7.55756	3.16799e-06		8.25526	0.25476		7.55756	0.00127
										7.60761	2.49198e-06		8.3033	0.25585		7.60761	0.00129
										7.65766	1.95533e-06		8.35135	0.25686		7.65766	0.00132
										7.70771	1.53043e-06		8.3994	0.2578		7.70771	0.00135
										7.75776	1.19488e-06		8.44745	0.25867		7.75776	0.00138
										7.80781	9.30573e-07		8.4955	0.25946		7.80781	0.00141
										7.85786	7.22926e-07		8.54354	0.26017		7.85786	0.00144
										7.90791	5.60213e-07		8.59159	0.2608		7.90791	0.00147
										7.95796	4.33042e-07		8.63964	0.26136		7.95796	0.0015
										8.00801	3.33905e-07		8.68769	0.26184		8.00801	0.00153
										8.05806	2.56822e-07		8.73574	0.26224		8.05806	0.00156
										8.10811	1.97042e-07		8.78378	0.26256		8.10811	0.00159
										8.15816	1.508e-07		8.83183	0.2628		8.15816	0.00163
										8.20821	1.15122e-07		8.87988	0.26297		8.20821	0.00166
										8.25826	8.76669e-08		8.92793	0.26305		8.25826	0.00169
										8.30831	6.65929e-08		8.97598	0.26305		8.30831	0.00173
										8.35836	5.04588e-08		9.02402	0.26298		8.35836	0.00176
										8.40841	3.81384e-08		9.07207	0.26282		8.40841	0.0018
										8.45846	2.87544e-08		9.12012	0.26259		8.45846	0.00184
										8.50851	2.16254e-08		9.16817	0.26227		8.50851	0.00188
										8.55856	1.62233e-08		9.21622	0.26188		8.55856	0.00191
										8.60861	1.21403e-08		9.26426	0.26141		8.60861	0.00195
										8.65866	9.06231e-09		9.31231	0.26086		8.65866	0.00199
										8.70871	6.74783e-09		9.36036	0.26023		8.70871	0.00203
										8.75876	5.01194e-09		9.40841	0.25952		8.75876	0.00207
										8.80881	3.71333e-09		9.45646	0.25874		8.80881	0.00212
										8.85886	2.74434e-09		9.5045	0.25788		8.85886	0.00216
										8.90891	2.02316e-09		9.55255	0.25695		8.90891	0.0022
										8.95896	1.48778e-09		9.6006	0.25594		8.95896	0.00225
										9.00901	1.09135e-09		9.64865	0.25486		9.00901	0.00229
										9.05906	7.98552e-10		9.6967	0.25371		9.05906	0.00234
										9.10911	5.82856e-10		9.74474	0.25249		9.10911	0.00238
										9.15916	4.24361e-10		9.79279	0.25119		9.15916	0.00243
										9.20921	3.08195e-10		9.84084	0.24983		9.20921	0.00248
										9.25926	2.23272e-10		9.88889	0.2484		9.25926	0.00253
										9.30931	1.61346e-10		9.93694	0.2469		9.30931	0.00258
										9.35936	1.16305e-10		9.98498	0.24534		9.35936	0.00263
										9.40941	8.36286e-11		10.033	0.24371		9.40941	0.00268
										9.45946	5.99831e-11		10.0811	0.24202		9.45946	0.00273
										9.50951	4.2916e-11		10.1291	0.24027		9.50951	0.00278
										9.55956	3.06285e-11		10.1772	0.23846		9.55956	0.00284
										9.60961	2.18047e-11		10.2252	0.23659		9.60961	0.00289
										9.65966	1.54842e-11		10.2733	0.23466		9.65966	0.00295
										9.70971	1.09685e-11		10.3213	0.23268		9.70971	0.00301
										9.75976	7.75031e-12		10.3694	0.23065		9.75976	0.00306
										9.80981	5.46272e-12		10.4174	0.22857		9.80981	0.00312
										9.85986	3.84074e-12		10.4655	0.22643		9.85986	0.00318
										9.90991	2.69363e-12		10.5135	0.22425		9.90991	0.00324
										9.95996	1.88442e-12		10.5616	0.22202		9.95996	0.00331
										10.01	1.31502e-12		10.6096	0.21975		10.01	0.00337
										10.0601	9.1539e-13		10.6577	0.21743		10.0601	0.00343
										10.1101	6.35617e-13		10.7057	0.21507		10.1101	0.0035
										10.1602	4.40252e-13		10.7538	0.21268		10.1602	0.00356
										10.2102	3.04175e-13		10.8018	0.21025		10.2102	0.00363
										10.2603	2.09634e-13		10.8498	0.20778		10.2603	0.0037
										10.3103	1.44118e-13		10.8979	0.20528		10.3103	0.00377
										10.3604	9.88304e-14		10.9459	0.20274		10.3604	0.00384
										10.4104	6.7605e-14		10.994	0.20018		10.4104	0.00391
										10.4605	4.61301e-14		11.042	0.19759		10.4605	0.00398
										10.5105	3.13983e-14		11.0901	0.19498		10.5105	0.00406
										10.5606	2.13179e-14		11.1381	0.19234		10.5606	0.00413
										10.6106	1.44378e-14		11.1862	0.18968		10.6106	0.00421
										10.6607	9.75374e-15		11.2342	0.187		10.6607	0.00428
										10.7107	6.57294e-15		11.2823	0.1843		10.7107	0.00436
										10.7608	4.41839e-15		11.3303	0.18158		10.7608	0.00444
										10.8108	2.96269e-15		11.3784	0.17886		10.8108	0.00452
										10.8609	1.98163e-15		11.4264	0.17611		10.8609	0.00461
										10.9109	1.32214e-15		11.4745	0.17336		10.9109	0.00469
										10.961	8.79932e-16		11.5225	0.1706		10.961	0.00477
										11.011	5.84167e-16		11.5706	0.16783		11.011	0.00486
										11.0611	3.86849e-16		11.6186	0.16506		11.0611	0.00495
										11.1111	2.55542e-16		11.6667	0.16229		11.1111	0.00504
										11.1612	1.68383e-16		11.7147	0.15951		11.1612	0.00513
										11.2112	1.10676e-16		11.7628	0.15673		11.2112	0.00522
										11.2613	7.25645e-17		11.8108	0.15396		11.2613	0.00531
										11.3113	4.74582e-17		11.8589	0.15118		11.3113	0.00541
										11.3614	3.0961e-17		11.9069	0.14842		11.3614	0.0055
										11.4114	2.01481e-17		11.955	0.14565		11.4114	0.0056
										11.4615	1.30789e-17		12.003	0.1429		11.4615	0.0057
										11.5115	8.46887e-18		12.0511	0.14016		11.5115	0.0058
										11.5616	5.4701e-18		12.0991	0.13743		11.5616	0.0059
										11.6116	3.52438e-18		12.1471	0.13471		11.6116	0.006
										11.6617	2.26509e-18		12.1952	0.132		11.6617	0.00611
										11.7117	1.45213e-18		12.2432	0.12931		11.7117	0.00621
										11.7618	9.28627e-19		12.2913	0.12663		11.7618	0.00632
										11.8118	5.92372e-19		12.3393	0.12398		11.8118	0.00643
										11.8619	3.76933e-19		12.3874	0.12134		11.8619	0.00654
										11.9119	2.39249e-19		12.4354	0.11872		11.9119	0.00665
										11.962	1.51479e-19		12.4835	0.11612		11.962	0.00677
										12.012	9.56692e-20		12.5315	0.11355		12.012	0.00688
										12.0621	6.02709e-20		12.5796	0.111		12.0621	0.007
										12.1121	3.78757e-20		12.6276	0.10847		12.1121	0.00712
										12.1622	2.37427e-20		12.6757	0.10597		12.1622	0.00724
										12.2122	1.48462e-20		12.7237	0.1035		12.2122	0.00736
										12.2623	9.26013e-21		12.7718	0.10105		12.2623	0.00749
										12.3123	5.7615e-21		12.8198	0.09863		12.3123	0.00761
										12.3624	3.57578e-21		12.8679	0.09624		12.3624	0.00774
										12.4124	2.21372e-21		12.9159	0.09388		12.4124	0.00787
										12.4625	1.36707e-21		12.964	0.09155		12.4625	0.008
										12.5125	8.42125e-22		13.012	0.08925		12.5125	0.00814
										12.5626	5.17462e-22		13.0601	0.08698		12.5626	0.00827
										12.6126	3.17173e-22		13.1081	0.08474		12.6126	0.00841
										12.6627	1.93924e-22		13.1562	0.08254		12.6627	0.00855
										12.7127	1.18272e-22		13.2042	0.08037		12.7127	0.00869
										12.7628	7.19533e-23		13.2523	0.07823		12.7628	0.00883
										12.8128	4.36652e-23		13.3003	0.07612		12.8128	0.00897
										12.8629	2.64324e-23		13.3483	0.07405		12.8629	0.00912
										12.9129	1.59608e-23		13.3964	0.07202		12.9129	0.00927
										12.963	9.61365e-24		13.4444	0.07002		12.963	0.00942
										13.013	5.77616e-24		13.4925	0.06805		13.013	0.00957
										13.0631	3.46184e-24		13.5405	0.06612		13.0631	0.00972
										13.1131	2.06962e-24		13.5886	0.06423		13.1131	0.00988
										13.1632	1.23422e-24		13.6366	0.06237		13.1632	0.01004
										13.2132	7.3419e-25		13.6847	0.06054		13.2132	0.0102
										13.2633	4.35654e-25		13.7327	0.05875		13.2633	0.01036
										13.3133	2.57865e-25		13.7808	0.057		13.3133	0.01052
										13.3634	1.52251e-25		13.8288	0.05528		13.3634	0.01069
										13.4134	8.96691e-26		13.8769	0.0536		13.4134	0.01086
										13.4635	5.26796e-26		13.9249	0.05195		13.4635	0.01103
										13.5135	3.08716e-26		13.973	0.05034		13.5135	0.0112
										13.5636	1.80465e-26		14.021	0.04876		13.5636	0.01138
										13.6136	1.05231e-26		14.0691	0.04722		13.6136	0.01155
										13.6637	6.12081e-27		14.1171	0.04572		13.6637	0.01173
										13.7137	3.55134e-27		14.1652	0.04424		13.7137	0.01191
										13.7638	2.05538e-27		14.2132	0.04281		13.7638	0.0121
										13.8138	1.18661e-27		14.2613	0.0414		13.8138	0.01228
										13.8639	6.83345e-28		14.3093	0.04004		13.8639	0.01247
										13.9139	3.92545e-28		14.3574	0.0387		13.9139	0.01266
										13.964	2.24934e-28		14.4054	0.0374		13.964	0.01286
										14.014	1.28569e-28		14.4535	0.03613		14.014	0.01305
										14.0641	7.33056e-29		14.5015	0.03489		14.0641	0.01325
										14.1141	4.1692e-29		14.5495	0.03369		14.1141	0.01345
										14.1642	2.36529e-29		14.5976	0.03251		14.1642	0.01365
										14.2142	1.33855e-29		14.6456	0.03137		14.2142	0.01386
										14.2643	7.55612e-30		14.6937	0.03026		14.2643	0.01406
										14.3143	4.25482e-30		14.7417	0.02918		14.3143	0.01427
										14.3644	2.3899e-30		14.7898	0.02813		14.3644	0.01449
										14.4144	1.33904e-30		14.8378	0.02711		14.4144	0.0147
										14.4645	7.48387e-31		14.8859	0.02612		14.4645	0.01492
										14.5145	4.17229e-31		14.9339	0.02515		14.5145	0.01514
										14.5646	2.32027e-31		14.982	0.02422		14.5646	0.01536
										14.6146	1.28712e-31		15.03	0.02331		14.6146	0.01558
										14.6647	7.12227e-32		15.0781	0.02243		14.6647	0.01581
										14.7147	3.93127e-32		15.1261	0.02158		14.7147	0.01604
										14.7648	2.16453e-32		15.1742	0.02075		14.7648	0.01627
										14.8148	1.18881e-32		15.2222	0.01995		14.8148	0.01651
										14.8649	6.51293e-33		15.2703	0.01917		14.8649	0.01674
										14.9149	3.55924e-33		15.3183	0.01842		14.9149	0.01698
										14.965	1.94024e-33		15.3664	0.01769		14.965	0.01723
										15.015	1.05504e-33		15.4144	0.01699		15.015	0.01747
										15.0651	5.72268e-34		15.4625	0.01631		15.0651	0.01772
										15.1151	3.09632e-34		15.5105	0.01565		15.1151	0.01797
										15.1652	1.67113e-34		15.5586	0.01501		15.1652	0.01822
										15.2152	8.99685e-35		15.6066	0.0144		15.2152	0.01848
										15.2653	4.83156e-35		15.6547	0.0138		15.2653	0.01874
										15.3153	2.58822e-35		15.7027	0.01323		15.3153	0.019
										15.3654	1.38303e-35		15.7508	0.01268		15.3654	0.01926
										15.4154	7.37187e-36		15.7988	0.01214		15.4154	0.01953
										15.4655	3.91959e-36		15.8468	0.01163		15.4655	0.0198
										15.5155	2.07884e-36		15.8949	0.01113		15.5155	0.02007
										15.5656	1.09981e-36		15.9429	0.01065		15.5656	0.02035
										15.6156	5.80404e-37		15.991	0.01019		15.6156	0.02062
										15.6657	3.05534e-37		16.039	0.00975		15.6657	0.02091
										15.7157	1.60438e-37		16.0871	0.00932		15.7157	0.02119
										15.7658	8.40367e-38		16.1351	0.00891		15.7658	0.02148
										15.8158	4.39084e-38		16.1832	0.00851		15.8158	0.02176
										15.8659	2.28846e-38		16.2312	0.00813		15.8659	0.02206
										15.9159	1.18975e-38		16.2793	0.00777		15.9159	0.02235
										15.966	6.17e-39		16.3273	0.00742		15.966	0.02265
										16.016	3.19177e-39		16.3754	0.00708		16.016	0.02295
										16.0661	1.647e-39		16.4234	0.00675		16.0661	0.02325
										16.1161	8.47758e-40		16.4715	0.00644		16.1161	0.02356
										16.1662	4.35279e-40		16.5195	0.00614		16.1662	0.02387
										16.2162	2.22936e-40		16.5676	0.00585		16.2162	0.02418
										16.2663	1.13896e-40		16.6156	0.00558		16.2663	0.0245
										16.3163	5.80434e-41		16.6637	0.00531		16.3163	0.02482
										16.3664	2.95063e-41		16.7117	0.00506		16.3664	0.02514
										16.4164	1.49621e-41		16.7598	0.00482		16.4164	0.02546
										16.4665	7.56812e-42		16.8078	0.00459		16.4665	0.02579
										16.5165	3.81856e-42		16.8559	0.00436		16.5165	0.02612
										16.5666	1.92188e-42		16.9039	0.00415		16.5666	0.02645
										16.6166	9.64877e-43		16.952	0.00395		16.6166	0.02679
										16.6667	4.83207e-43		17	0.00375		16.6667	0.02713
										16.7167	2.41385e-43		17.048	0.00357		16.7167	0.02747
										16.7668	1.20283e-43		17.0961	0.00339		16.7668	0.02782
										16.8168	5.97883e-44		17.1441	0.00322		16.8168	0.02817
										16.8669	2.96445e-44		17.1922	0.00306		16.8669	0.02852
										16.9169	1.46618e-44		17.2402	0.0029		16.9169	0.02887
										16.967	7.2335e-45		17.2883	0.00275		16.967	0.02923
										17.017	3.5598e-45		17.3363	0.00261		17.017	0.02959
										17.0671	1.74751e-45		17.3844	0.00248		17.0671	0.02995
										17.1171	8.55716e-46		17.4324	0.00235		17.1171	0.03032
										17.1672	4.17981e-46		17.4805	0.00223		17.1672	0.03069
										17.2172	2.03657e-46		17.5285	0.00211		17.2172	0.03106
										17.2673	9.8983e-47		17.5766	0.002		17.2673	0.03144
										17.3173	4.79885e-47		17.6246	0.00189		17.3173	0.03181
										17.3674	2.32076e-47		17.6727	0.00179		17.3674	0.0322
										17.4174	1.11954e-47		17.7207	0.00169		17.4174	0.03258
										17.4675	5.38724e-48		17.7688	0.0016		17.4675	0.03297
										17.5175	2.58589e-48		17.8168	0.00152		17.5175	0.03336
										17.5676	1.23814e-48		17.8649	0.00143		17.5676	0.03375
										17.6176	5.91351e-49		17.9129	0.00135		17.6176	0.03415
										17.6677	2.81733e-49		17.961	0.00128		17.6677	0.03455
										17.7177	1.3389e-49		18.009	0.00121		17.7177	0.03495
										17.7678	6.34707e-50		18.0571	0.00114		17.7678	0.03536
										17.8178	3.00135e-50		18.1051	0.00108		17.8178	0.03577
										17.8679	1.41571e-50		18.1532	0.00102		17.8679	0.03618
										17.9179	6.66117e-51		18.2012	0.000959835		17.9179	0.0366
										17.968	3.12639e-51		18.2492	0.000905308		17.968	0.03701
										18.018	1.4637e-51		18.2973	0.00085362		18.018	0.03744
										18.0681	6.83561e-52		18.3453	0.000804639		18.0681	0.03786
										18.1181	3.18434e-52		18.3934	0.000758239		18.1181	0.03829
										18.1682	1.47971e-52		18.4414	0.000714298		18.1682	0.03872
										18.2182	6.85888e-53		18.4895	0.0006727		18.2182	0.03915
										18.2683	3.17135e-53		18.5375	0.000633332		18.2683	0.03959
										18.3183	1.46269e-53		18.5856	0.000596087		18.3183	0.04003
										18.3684	6.72942e-54		18.6336	0.000560862		18.3684	0.04047
										18.4184	3.0883e-54		18.6817	0.000527559		18.4184	0.04091
										18.4685	1.41377e-54		18.7297	0.000496084		18.4685	0.04136
										18.5185	6.45583e-55		18.7778	0.000466344		18.5185	0.04181
										18.5686	2.94065e-55		18.8258	0.000438255		18.5686	0.04227
										18.6186	1.33614e-55		18.8739	0.000411733		18.6186	0.04272
										18.6687	6.05585e-56		18.9219	0.000386698		18.6687	0.04318
										18.7187	2.73789e-56		18.97	0.000363076		18.7187	0.04364
										18.7688	1.23473e-56		19.018	0.000340794		18.7688	0.04411
										18.8188	5.55454e-57		19.0661	0.000319781		18.8188	0.04458
										18.8689	2.49252e-57		19.1141	0.000299974		18.8689	0.04505
										18.9189	1.1157e-57		19.1622	0.000281308		18.9189	0.04552
										18.969	4.98161e-58		19.2102	0.000263724		18.969	0.046
										19.019	2.21876e-58		19.2583	0.000247164		19.019	0.04648
										19.0691	9.8575e-59		19.3063	0.000231573		19.0691	0.04696
										19.1191	4.36858e-59		19.3544	0.000216901		19.1191	0.04745
										19.1692	1.93122e-59		19.4024	0.000203096		19.1692	0.04794
										19.2192	8.51604e-60		19.4505	0.000190112		19.2192	0.04843
										19.2693	3.74594e-60		19.4985	0.000177905		19.2693	0.04892
										19.3193	1.64362e-60		19.5465	0.000166431		19.3193	0.04942
										19.3694	7.19378e-61		19.5946	0.000155649		19.3694	0.04992
										19.4194	3.14073e-61		19.6426	0.000145522		19.4194	0.05042
										19.4695	1.36779e-61		19.6907	0.000136013		19.4695	0.05092
										19.5195	5.94191e-62		19.7387	0.000127087		19.5195	0.05143
										19.5696	2.57483e-62		19.7868	0.00011871		19.5696	0.05194
										19.6196	1.11298e-62		19.8348	0.000110852		19.6196	0.05245
										19.6697	4.79893e-63		19.8829	0.000103483		19.6697	0.05297
										19.7197	2.06403e-63		19.9309	9.65738e-05		19.7197	0.05348
										19.7698	8.85535e-64		19.979	9.00991e-05		19.7698	0.054
										19.8198	3.78976e-64		20.027	8.4033e-05		19.8198	0.05452
										19.8699	1.61783e-64		20.0751	7.83515e-05		19.8699	0.05505
										19.9199	6.88926e-65		20.1231	7.3032e-05		19.9199	0.05558
										19.97	2.92636e-65		20.1712	6.80531e-05		19.97	0.05611
										20.02	1.23994e-65		20.2192	6.33943e-05		20.02	0.05664
										20.0701	5.24069e-66		20.2673	5.90366e-05		20.0701	0.05717
										20.1201	2.2095e-66		20.3153	5.49618e-05		20.1201	0.05771
										20.1702	9.29213e-67		20.3634	5.11527e-05		20.1702	0.05825
										20.2202	3.89811e-67		20.4114	4.75932e-05		20.2202	0.05879
										20.2703	1.63121e-67		20.4595	4.42679e-05		20.2703	0.05933
										20.3203	6.80895e-68		20.5075	4.11625e-05		20.3203	0.05988
										20.3704	2.8351e-68		20.5556	3.82634e-05		20.3704	0.06042
										20.4204	1.17753e-68		20.6036	3.55577e-05		20.4204	0.06097
										20.4705	4.87859e-69		20.6517	3.30332e-05		20.4705	0.06153
										20.5205	2.01619e-69		20.6997	3.06787e-05		20.5205	0.06208
										20.5706	8.31163e-70		20.7477	2.84834e-05		20.5706	0.06264
										20.6206	3.41788e-70		20.7958	2.64372e-05		20.6206	0.0632
										20.6707	1.40199e-70		20.8438	2.45305e-05		20.6707	0.06376
										20.7207	5.73653e-71		20.8919	2.27545e-05		20.7207	0.06432
										20.7708	2.34137e-71		20.9399	2.11006e-05		20.7708	0.06488
										20.8208	9.5325e-72		20.988	1.9561e-05		20.8208	0.06545
										20.8709	3.87134e-72		21.036	1.81283e-05		20.8709	0.06601
										20.9209	1.56831e-72		21.0841	1.67954e-05		20.9209	0.06658
										20.971	6.3375e-73		21.1321	1.55557e-05		20.971	0.06716
										21.021	2.55459e-73		21.1802	1.44033e-05		21.021	0.06773
										21.0711	1.02717e-73		21.2282	1.33321e-05		21.0711	0.0683
										21.1211	4.11983e-74		21.2763	1.23369e-05		21.1211	0.06888
										21.1712	1.64828e-74		21.3243	1.14125e-05		21.1712	0.06946
										21.2212	6.57812e-75		21.3724	1.05542e-05		21.2212	0.07004
										21.2713	2.61872e-75		21.4204	9.75744e-06		21.2713	0.07062
										21.3213	1.0399e-75		21.4685	9.01812e-06		21.3213	0.0712
										21.3714	4.11918e-76		21.5165	8.33229e-06		21.3714	0.07178
										21.4214	1.6276e-76		21.5646	7.69629e-06		21.4214	0.07237
										21.4715	6.41505e-77		21.6126	7.10668e-06		21.4715	0.07296
										21.5215	2.52214e-77		21.6607	6.56025e-06		21.5215	0.07354
										21.5716	9.89135e-78		21.7087	6.054e-06		21.5716	0.07413
										21.6216	3.86953e-78		21.7568	5.58512e-06		21.6216	0.07472
										21.6717	1.51e-78		21.8048	5.151e-06		21.6717	0.07531
										21.7217	5.87778e-79		21.8529	4.74918e-06		21.7217	0.07591
										21.7718	2.28226e-79		21.9009	4.37737e-06		21.7718	0.0765
										21.8218	8.83963e-80		21.9489	4.03346e-06		21.8218	0.0771
										21.8719	3.41523e-80		21.997	3.71543e-06		21.8719	0.07769
										21.9219	1.3162e-80		22.045	3.42145e-06		21.9219	0.07829
										21.972	5.05988e-81		22.0931	3.14977e-06		21.972	0.07888
										22.022	1.94033e-81		22.1411	2.89879e-06		22.022	0.07948
										22.0721	7.42211e-82		22.1892	2.66699e-06		22.0721	0.08008
										22.1221	2.83202e-82		22.2372	2.45299e-06		22.1221	0.08068
										22.1722	1.07791e-82		22.2853	2.25547e-06		22.1722	0.08128
										22.2222	4.09244e-83		22.3333	2.07324e-06		22.2222	0.08188
										22.2723	1.54989e-83		22.3814	1.90514e-06		22.2723	0.08249
										22.3223	5.85511e-84		22.4294	1.75015e-06		22.3223	0.08309
										22.3724	2.20641e-84		22.4775	1.60728e-06		22.3724	0.08369
										22.4224	8.29381e-85		22.5255	1.47562e-06		22.4224	0.08429
										22.4725	3.10984e-85		22.5736	1.35434e-06		22.4725	0.0849
										22.5225	1.16316e-85		22.6216	1.24265e-06		22.5225	0.0855
										22.5726	4.33967e-86		22.6697	1.13982e-06		22.5726	0.0861
										22.6226	1.61507e-86		22.7177	1.04519e-06		22.6226	0.08671
										22.6727	5.99573e-87		22.7658	9.58122e-07		22.6727	0.08731
										22.7227	2.22029e-87		22.8138	8.78042e-07		22.7227	0.08792
										22.7728	8.20149e-88		22.8619	8.04411e-07		22.7728	0.08852
										22.8228	3.02199e-88		22.9099	7.36731e-07		22.8228	0.08913
										22.8729	1.11074e-88		22.958	6.74541e-07		22.8729	0.08973
										22.9229	4.07234e-89		23.006	6.17413e-07		22.9229	0.09033
										22.973	1.48934e-89		23.0541	5.64953e-07		22.973	0.09094
										23.023	5.43327e-90		23.1021	5.16793e-07		23.023	0.09154
										23.0731	1.97717e-90		23.1502	4.72595e-07		23.0731	0.09214
										23.1231	7.17702e-91		23.1982	4.32046e-07		23.1231	0.09275
										23.1732	2.59873e-91		23.2462	3.94857e-07		23.1732	0.09335
										23.2232	9.38629e-92		23.2943	3.6076e-07		23.2232	0.09395
										23.2733	3.38177e-92		23.3423	3.29507e-07		23.2733	0.09455
										23.3233	1.21537e-92		23.3904	3.0087e-07		23.3233	0.09515
										23.3734	4.35705e-93		23.4384	2.74639e-07		23.3734	0.09575
										23.4234	1.55809e-93		23.4865	2.50619e-07		23.4234	0.09635
										23.4735	5.55787e-94		23.5345	2.2863e-07		23.4735	0.09695
										23.5235	1.97761e-94		23.5826	2.08507e-07		23.5235	0.09755
										23.5736	7.01924e-95		23.6306	1.90098e-07		23.5736	0.09815
										23.6236	2.48517e-95		23.6787	1.73262e-07		23.6236	0.09874
										23.6737	8.77684e-96		23.7267	1.57868e-07		23.6737	0.09934
										23.7237	3.09198e-96		23.7748	1.43799e-07		23.7237	0.09993
										23.7738	1.08656e-96		23.8228	1.30944e-07		23.7738	0.10052
										23.8238	3.80877e-97		23.8709	1.19202e-07		23.8238	0.10111
										23.8739	1.33178e-97		23.9189	1.08481e-07		23.8739	0.1017
										23.9239	4.64514e-98		23.967	9.86931e-08		23.9239	0.10229
										23.974	1.61614e-98		24.015	8.97615e-08		23.974	0.10288
										24.024	5.60891e-99		24.0631	8.16135e-08		24.024	0.10346
										24.0741	1.94175e-99		24.1111	7.41826e-08		24.0741	0.10405
										24.1241	6.70541e-100		24.1592	6.74078e-08		24.1241	0.10463
										24.1742	2.30979e-100		24.2072	6.12332e-08		24.1742	0.10521
										24.2242	7.93666e-101		24.2553	5.56074e-08		24.2242	0.10579
										24.2743	2.72031e-101		24.3033	5.04831e-08		24.2743	0.10637
										24.3243	9.30073e-102		24.3514	4.58171e-08		24.3243	0.10694
										24.3744	3.17199e-102		24.3994	4.15698e-08		24.3744	0.10752
										24.4244	1.0791e-102		24.4474	3.77048e-08		24.4244	0.10809
										24.4745	3.66193e-103		24.4955	3.41888e-08		24.4745	0.10866
										24.5245	1.23958e-103		24.5435	3.09912e-08		24.5245	0.10922
										24.5746	4.18557e-104		24.5916	2.80842e-08		24.5746	0.10979
										24.6246	1.40978e-104		24.6396	2.54422e-08		24.6246	0.11035
										24.6747	4.73659e-105		24.6877	2.30417e-08		24.6747	0.11091
										24.7247	1.58744e-105		24.7357	2.08614e-08		24.7247	0.11147
										24.7748	5.30694e-106		24.7838	1.88817e-08		24.7748	0.11203
										24.8248	1.76973e-106		24.8318	1.70847e-08		24.8248	0.11258
										24.8749	5.88691e-107		24.8799	1.5454e-08		24.8749	0.11313
										24.9249	1.95337e-107		24.9279	1.39747e-08		24.9249	0.11368
										24.975	6.46544e-108		24.976	1.26332e-08		24.975	0.11422
										25.025	2.13466e-108		25.024	1.1417e-08		25.025	0.11476
										25.0751	7.03031e-109		25.0721	1.03148e-08		25.0751	0.1153
										25.1251	2.3096e-109		25.1201	9.31612e-09		25.1251	0.11584
										25.1752	7.56863e-110		25.1682	8.41161e-09		25.1752	0.11637
										25.2252	2.47408e-110		25.2162	7.59262e-09		25.2252	0.1169
										25.2753	8.06727e-111		25.2643	6.85129e-09		25.2753	0.11743
										25.3253	2.62395e-111		25.3123	6.18047e-09		25.3253	0.11796
										25.3754	8.51338e-112		25.3604	5.57364e-09		25.3754	0.11848
										25.4254	2.75527e-112		25.4084	5.02487e-09		25.4254	0.11899
										25.4755	8.89495e-113		25.4565	4.52876e-09		25.4755	0.11951
										25.5255	2.86444e-113		25.5045	4.08039e-09		25.5255	0.12002
										25.5756	9.20136e-114		25.5526	3.6753e-09		25.5756	0.12053
										25.6256	2.94836e-114		25.6006	3.30942e-09		25.6256	0.12103
										25.6757	9.4238e-115		25.6486	2.97906e-09		25.6757	0.12153
										25.7257	3.00461e-115		25.6967	2.68087e-09		25.7257	0.12203
										25.7758	9.5558e-116		25.7447	2.41179e-09		25.7758	0.12252
										25.8258	3.03153e-116		25.7928	2.16907e-09		25.8258	0.12301
										25.8759	9.59343e-117		25.8408	1.95018e-09		25.8759	0.12349
										25.9259	3.02832e-117		25.8889	1.75284e-09		25.9259	0.12398
										25.976	9.53559e-118		25.9369	1.575e-09		25.976	0.12445
										26.026	2.99508e-118		25.985	1.41478e-09		26.026	0.12493
										26.0761	9.38398e-119		26.033	1.27046e-09		26.0761	0.1254
										26.1261	2.9328e-119		26.0811	1.14053e-09		26.1261	0.12586
										26.1762	9.14309e-120		26.1291	1.02357e-09		26.1762	0.12632
										26.2262	2.84329e-120		26.1772	9.18324e-10		26.2262	0.12678
										26.2763	8.81994e-121		26.2252	8.23652e-10		26.2763	0.12723
										26.3263	2.72914e-121		26.2733	7.38517e-10		26.3263	0.12768
										26.3764	8.42373e-122		26.3213	6.6198e-10		26.3764	0.12812
										26.4264	2.59357e-122		26.3694	5.93196e-10		26.4264	0.12856
										26.4765	7.96543e-123		26.4174	5.31398e-10		26.4765	0.12899
										26.5265	2.44026e-123		26.4655	4.75893e-10		26.5265	0.12942
										26.5766	7.45728e-124		26.5135	4.26057e-10		26.5766	0.12985
										26.6266	2.27322e-124		26.5616	3.81324e-10		26.6266	0.13027
										26.6767	6.91223e-125		26.6096	3.41184e-10		26.6767	0.13069
										26.7267	2.09658e-125		26.6577	3.05177e-10		26.7267	0.1311
										26.7768	6.3434e-126		26.7057	2.72888e-10		26.7768	0.1315
										26.8268	1.91447e-126		26.7538	2.43941e-10		26.8268	0.1319
										26.8769	5.76358e-127		26.8018	2.17998e-10		26.8769	0.1323
										26.9269	1.73082e-127		26.8498	1.94755e-10		26.9269	0.13269
										26.977	5.18476e-128		26.8979	1.73938e-10		26.977	0.13308
										27.027	1.54925e-128		26.9459	1.55299e-10		27.027	0.13346
										27.0771	4.61776e-129		26.994	1.38615e-10		27.0771	0.13383
										27.1271	1.37296e-129		27.042	1.23686e-10		27.1271	0.1342
										27.1772	4.07194e-130		27.0901	1.10331e-10		27.1772	0.13457
										27.2272	1.20465e-130		27.1381	9.83887e-11		27.2272	0.13493
										27.2773	3.55497e-131		27.1862	8.77123e-11		27.2773	0.13528
										27.3273	0		27.2342	7.81707e-11		27.3273	0.13563
										27.3774	0		27.2823	6.9646e-11		27.3774	0.13597
										27.4274	0		27.3303	6.20321e-11		27.4274	0.13631
										27.4775	0		27.3784	5.52338e-11		27.4775	0.13664
										27.5275	0		27.4264	4.91657e-11		27.5275	0.13697
										27.5776	0		27.4745	4.3751e-11		27.5776	0.13729
										27.6276	0		27.5225	3.89208e-11		27.6276	0.1376
										27.6777	0		27.5706	3.46134e-11		27.6777	0.13791
										27.7277	0		27.6186	3.07733e-11		27.7277	0.13822
										27.7778	0		27.6667	2.7351e-11		27.7778	0.13851
										27.8278	0		27.7147	2.43019e-11		27.8278	0.13881
										27.8779	0		27.7628	2.15862e-11		27.8779	0.13909
										27.9279	0		27.8108	1.91681e-11		27.9279	0.13937
										27.978	0		27.8589	1.70158e-11		27.978	0.13965
										28.028	0		27.9069	1.51006e-11		28.028	0.13991
										28.0781	0		27.955	1.33968e-11		28.0781	0.14018
										28.1281	0		28.003	1.18817e-11		28.1281	0.14043
										28.1782	0		28.0511	1.05348e-11		28.1782	0.14068
										28.2282	0		28.0991	9.33769e-12		28.2282	0.14092
										28.2783	0		28.1471	8.27413e-12		28.2783	0.14116
										28.3283	0		28.1952	7.32948e-12		28.3283	0.14139
										28.3784	0		28.2432	6.49071e-12		28.3784	0.14162
										28.4284	0		28.2913	5.74619e-12		28.4284	0.14184
										28.4785	0		28.3393	5.08553e-12		28.4785	0.14205
										28.5285	0		28.3874	4.49946e-12		28.5285	0.14225
										28.5786	0		28.4354	3.97972e-12		28.5786	0.14245
										28.6286	0		28.4835	3.51896e-12		28.6286	0.14265
										28.6787	0		28.5315	3.11059e-12		28.6787	0.14283
										28.7287	0		28.5796	2.74879e-12		28.7287	0.14301
										28.7788	0		28.6276	2.42833e-12		28.7788	0.14318
										28.8288	0		28.6757	2.14458e-12		28.8288	0.14335
										28.8789	0		28.7237	1.89341e-12		28.8789	0.14351
										28.9289	0		28.7718	1.67115e-12		28.9289	0.14367
										28.979	0		28.8198	1.47454e-12		28.979	0.14381
										29.029	0		28.8679	1.30066e-12		29.029	0.14395
										29.0791	0		28.9159	1.14694e-12		29.0791	0.14409
										29.1291	0		28.964	1.01108e-12		29.1291	0.14421
										29.1792	0		29.012	8.91041e-13		29.1792	0.14433
										29.2292	0		29.0601	7.85017e-13		29.2292	0.14445
										29.2793	0		29.1081	6.91399e-13		29.2793	0.14456
										29.3293	0		29.1562	6.08761e-13		29.3293	0.14466
										29.3794	0		29.2042	5.35838e-13		29.3794	0.14475
										29.4294	0		29.2523	4.71507e-13		29.4294	0.14484
										29.4795	0		29.3003	4.14774e-13		29.4795	0.14492
										29.5295	0		29.3483	3.64756e-13		29.5295	0.14499
										29.5796	0		29.3964	3.20673e-13		29.5796	0.14506
										29.6296	0		29.4444	2.81833e-13		29.6296	0.14512
										29.6797	0		29.4925	2.47621e-13		29.6797	0.14517
										29.7297	0		29.5405	2.17497e-13		29.7297	0.14522
										29.7798	0		29.5886	1.90979e-13		29.7798	0.14526
										29.8298	0		29.6366	1.67644e-13		29.8298	0.14529
										29.8799	0		29.6847	1.47115e-13		29.8799	0.14531
										29.9299	0		29.7327	1.29061e-13		29.9299	0.14533
										29.98	0		29.7808	1.13189e-13		29.98	0.14534
										30.03	0		29.8288	9.92382e-14		30.03	0.14535
										30.0801	0		29.8769	8.69806e-14		30.0801	0.14535
										30.1301	0		29.9249	7.62139e-14		30.1301	0.14534
										30.1802	0		29.973	6.67597e-14		30.1802	0.14533
										30.2302	0		30.021	5.84606e-14		30.2302	0.1453
										30.2803	0		30.0691	5.11776e-14		30.2803	0.14527
										30.3303	0		30.1171	4.47884e-14		30.3303	0.14524
										30.3804	0		30.1652	3.9185e-14		30.3804	0.1452
										30.4304	0		30.2132	3.42722e-14		30.4304	0.14515
										30.4805	0		30.2613	2.99662e-14		30.4805	0.14509
										30.5305	0		30.3093	2.61933e-14		30.5305	0.14503
										30.5806	0		30.3574	2.28885e-14		30.5806	0.14496
										30.6306	0		30.4054	1.99946e-14		30.6306	0.14488
										30.6807	0		30.4535	1.74613e-14		30.6807	0.1448
										30.7307	0		30.5015	1.52444e-14		30.7307	0.14471
										30.7808	0		30.5495	1.33049e-14		30.7808	0.14461
										30.8308	0		30.5976	1.16086e-14		30.8308	0.14451
										30.8809	0		30.6456	1.01255e-14		30.8809	0.1444
										30.9309	0		30.6937	8.82922e-15		30.9309	0.14428
										30.981	0		30.7417	7.69656e-15		30.981	0.14416
										31.031	0		30.7898	6.70717e-15		31.031	0.14403
										31.0811	0		30.8378	5.84319e-15		31.0811	0.14389
										31.1311	0		30.8859	5.08896e-15		31.1311	0.14375
										31.1812	0		30.9339	4.43074e-15		31.1812	0.1436
										31.2312	0		30.982	3.85649e-15		31.2312	0.14344
										31.2813	0		31.03	3.35565e-15		31.2813	0.14328
										31.3313	0		31.0781	2.91897e-15		31.3313	0.14311
										31.3814	0		31.1261	2.53834e-15		31.3814	0.14293
										31.4314	0		31.1742	2.20668e-15		31.4314	0.14275
										31.4815	0		31.2222	1.91777e-15		31.4815	0.14256
										31.5315	0		31.2703	1.66619e-15		31.5315	0.14236
										31.5816	0		31.3183	1.44716e-15		31.5816	0.14216
										31.6316	0		31.3664	1.25655e-15		31.6316	0.14195
										31.6817	0		31.4144	1.09072e-15		31.6817	0.14174
										31.7317	0		31.4625	9.4648e-16		31.7317	0.14152
										31.7818	0		31.5105	8.21069e-16		31.7818	0.14129
										31.8318	0		31.5586	7.12059e-16		31.8318	0.14106
										31.8819	0		31.6066	6.17334e-16		31.8819	0.14082
										31.9319	0		31.6547	5.35049e-16		31.9319	0.14057
										31.982	0		31.7027	4.63591e-16		31.982	0.14032
										32.032	0		31.7508	4.01554e-16		32.032	0.14006
										32.0821	0		31.7988	3.47714e-16		32.0821	0.1398
										32.1321	0		31.8468	3.01002e-16		32.1321	0.13953
										32.1822	0		31.8949	2.60486e-16		32.1822	0.13925
										32.2322	0		31.9429	2.25355e-16		32.2322	0.13897
										32.2823	0		31.991	1.94903e-16		32.2823	0.13868
										32.3323	0		32.039	1.68515e-16		32.3323	0.13838
										32.3824	0		32.0871	1.45655e-16		32.3824	0.13808
										32.4324	0		32.1351	1.25859e-16		32.4324	0.13778
										32.4825	0		32.1832	1.0872e-16		32.4825	0.13747
										32.5325	0		32.2312	9.38861e-17		32.5325	0.13715
										32.5826	0		32.2793	8.10519e-17		32.5826	0.13682
										32.6326	0		32.3273	6.99509e-17		32.6326	0.1365
										32.6827	0		32.3754	6.0352e-17		32.6827	0.13616
										32.7327	0		32.4234	5.20545e-17		32.7327	0.13582
										32.7828	0		32.4715	4.48842e-17		32.7828	0.13547
										32.8328	0		32.5195	3.86898e-17		32.8328	0.13512
										32.8829	0		32.5676	3.33402e-17		32.8829	0.13477
										32.9329	0		32.6156	2.87216e-17		32.9329	0.13441
										32.983	0		32.6637	2.47353e-17		32.983	0.13404
										33.033	0		32.7117	2.12958e-17		33.033	0.13367
										33.0831	0		32.7598	1.83291e-17		33.0831	0.13329
										33.1331	0		32.8078	1.57708e-17		33.1331	0.1329
										33.1832	0		32.8559	1.35655e-17		33.1832	0.13252
										33.2332	0		32.9039	1.1665e-17		33.2332	0.13212
										33.2833	0		32.9519	1.00278e-17		33.2833	0.13173
										33.3333	0		33	8.61771e-18		33.3333	0.13132
										33.3834	0		33.0481	7.40368e-18		33.3834	0.13091
										33.4334	0		33.0961	6.35874e-18		33.4334	0.1305
										33.4835	0		33.1441	5.45963e-18		33.4835	0.13008
										33.5335	0		33.1922	4.68624e-18		33.5335	0.12966
										33.5836	0		33.2402	4.02118e-18		33.5836	0.12923
										33.6336	0		33.2883	3.44945e-18		33.6336	0.1288
										33.6837	0		33.3363	2.95812e-18		33.6837	0.12837
										33.7337	0		33.3844	2.53601e-18		33.7337	0.12792
										33.7838	0		33.4324	2.17346e-18		33.7838	0.12748
										33.8338	0		33.4805	1.86219e-18		33.8338	0.12703
										33.8839	0		33.5285	1.59501e-18		33.8839	0.12658
										33.9339	0		33.5766	1.36575e-18		33.9339	0.12612
										33.984	0		33.6246	1.16908e-18		33.984	0.12565
										34.034	0		33.6727	1.00044e-18		34.034	0.12519
										34.0841	0		33.7207	8.5586e-19		34.0841	0.12472
										34.1341	0		33.7688	7.31953e-19		34.1341	0.12424
										34.1842	0		33.8168	6.25796e-19		34.1842	0.12376
										34.2342	0		33.8649	5.34873e-19		34.2342	0.12328
										34.2843	0		33.9129	4.57021e-19		34.2843	0.12279
										34.3343	0		33.961	3.90383e-19		34.3343	0.1223
										34.3844	0		34.009	3.3336e-19		34.3844	0.12181
										34.4344	0		34.0571	2.8458e-19		34.4344	0.12131
										34.4845	0		34.1051	2.42865e-19		34.4845	0.12081
										34.5345	0		34.1531	2.07201e-19		34.5345	0.1203
										34.5846	0		34.2012	1.76721e-19		34.5846	0.11979
										34.6346	0		34.2493	1.50679e-19		34.6346	0.11928
										34.6847	0		34.2973	1.28436e-19		34.6847	0.11876
										34.7347	0		34.3454	1.09443e-19		34.7347	0.11824
										34.7848	0		34.3934	9.32302e-20		34.7848	0.11772
										34.8348	0		34.4414	7.93953e-20		34.8348	0.1172
										34.8849	0		34.4895	6.75929e-20		34.8849	0.11667
										34.9349	0		34.5375	5.75275e-20		34.9349	0.11614
										34.985	0		34.5856	4.89462e-20		34.985	0.1156
										35.035	0		34.6336	4.16323e-20		35.035	0.11506
										35.0851	0		34.6817	3.54006e-20		35.0851	0.11452
										35.1351	0		34.7297	3.00925e-20		35.1351	0.11398
										35.1852	0		34.7778	2.55726e-20		35.1852	0.11343
										35.2352	0		34.8258	2.1725e-20		35.2352	0.11288
										35.2853	0		34.8739	1.84507e-20		35.2853	0.11233
										35.3353	0		34.9219	1.56652e-20		35.3353	0.11178
										35.3854	0		34.97	1.32961e-20		35.3854	0.11122
										35.4354	0		35.018	1.12819e-20		35.4354	0.11066
										35.4855	0		35.0661	9.56995e-21		35.4855	0.1101
										35.5355	0		35.1141	8.1153e-21		35.5355	0.10954
										35.5856	0		35.1622	6.87968e-21		35.5856	0.10897
										35.6356	0		35.2102	5.83042e-21		35.6356	0.1084
										35.6857	0		35.2583	4.9397e-21		35.6857	0.10783
										35.7357	0		35.3063	4.18378e-21		35.7357	0.10726
										35.7858	0		35.3543	3.54247e-21		35.7858	0.10669
										35.8358	0		35.4024	2.99855e-21		35.8358	0.10611
										35.8859	0		35.4504	2.53737e-21		35.8859	0.10553
										35.9359	0		35.4985	2.14648e-21		35.9359	0.10495
										35.986	0		35.5466	1.81525e-21		35.986	0.10437
										36.036	0		35.5946	1.53467e-21		36.036	0.10379
										36.0861	0		35.6426	1.29707e-21		36.0861	0.1032
										36.1361	0		35.6907	1.09592e-21		36.1361	0.10262
										36.1862	0		35.7387	9.25682e-22		36.1862	0.10203
										36.2362	0		35.7868	7.81653e-22		36.2362	0.10144
										36.2863	0		35.8348	6.59834e-22		36.2863	0.10085
										36.3363	0		35.8829	5.56831e-22		36.3363	0.10026
										36.3864	0		35.9309	4.69765e-22		36.3864	0.09967
										36.4364	0		35.979	3.96192e-22		36.4364	0.09907
										36.4865	0		36.027	3.34041e-22		36.4865	0.09848
										36.5365	0		36.0751	2.81555e-22		36.5365	0.09788
										36.5866	0		36.1231	2.37243e-22		36.5866	0.09728
										36.6366	0		36.1712	1.99845e-22		36.6366	0.09669
										36.6867	0		36.2192	1.68291e-22		36.6867	0.09609
										36.7367	0		36.2673	1.41676e-22		36.7367	0.09549
										36.7868	0		36.3153	1.19234e-22		36.7868	0.09489
										36.8368	0		36.3634	1.00316e-22		36.8368	0.09429
										36.8869	0		36.4114	8.43748e-23		36.8869	0.09368
										36.9369	0		36.4595	7.09451e-23		36.9369	0.09308
										36.987	0		36.5075	5.96348e-23		36.987	0.09248
										37.037	0		36.5556	5.01125e-23		37.037	0.09188
										37.0871	0		36.6036	4.20979e-23		37.0871	0.09127
										37.1371	0		36.6516	3.53543e-23		37.1371	0.09067
										37.1872	0		36.6997	2.9682e-23		37.1872	0.09006
										37.2372	0		36.7478	2.49123e-23		37.2372	0.08946
										37.2873	0		36.7958	2.09026e-23		37.2873	0.08886
										37.3373	0		36.8438	1.7533e-23		37.3373	0.08825
										37.3874	0		36.8919	1.47022e-23		37.3874	0.08765
										37.4374	0		36.9399	1.23246e-23		37.4374	0.08704
										37.4875	0		36.988	1.03285e-23		37.4875	0.08644
										37.5375	0		37.036	8.65297e-24		37.5375	0.08584
										37.5876	0		37.0841	7.24708e-24		37.5876	0.08523
										37.6376	0		37.1321	6.06778e-24		37.6376	0.08463
										37.6877	0		37.1802	5.07884e-24		37.6877	0.08402
										37.7377	0		37.2282	4.24979e-24		37.7377	0.08342
										37.7878	0		37.2763	3.55499e-24		37.7878	0.08282
										37.8378	0		37.3243	2.97289e-24		37.8378	0.08222
										37.8879	0		37.3724	2.48534e-24		37.8879	0.08162
										37.9379	0		37.4204	2.07713e-24		37.9379	0.08102
										37.988	0		37.4685	1.73543e-24		37.988	0.08042
										38.038	0		37.5165	1.44951e-24		38.038	0.07982
										38.0881	0		37.5646	1.21033e-24		38.0881	0.07922
										38.1381	0		37.6126	1.01031e-24		38.1381	0.07862
										38.1882	0		37.6607	8.43084e-25		38.1882	0.07802
										38.2382	0		37.7087	7.03327e-25		38.2382	0.07743
										38.2883	0		37.7568	5.8656e-25		38.2883	0.07683
										38.3383	0		37.8048	4.8903e-25		38.3383	0.07624
										38.3884	0		37.8528	4.07594e-25		38.3884	0.07564
										38.4384	0		37.9009	3.39616e-25		38.4384	0.07505
										38.4885	0		37.949	2.82889e-25		38.4885	0.07446
										38.5385	0		37.997	2.35566e-25		38.5385	0.07387
										38.5886	0		38.0451	1.961e-25		38.5886	0.07328
										38.6386	0		38.0931	1.63197e-25		38.6386	0.07269
										38.6887	0		38.1411	1.35773e-25		38.6887	0.07211
										38.7387	0		38.1892	1.12923e-25		38.7387	0.07152
										38.7888	0		38.2372	9.38907e-26		38.7888	0.07094
										38.8388	0		38.2853	7.80422e-26		38.8388	0.07036
										38.8889	0		38.3333	6.48493e-26		38.8889	0.06978
										38.9389	0		38.3814	5.38702e-26		38.9389	0.0692
										38.989	0		38.4294	4.47364e-26		38.989	0.06862
										39.039	0		38.4775	3.71399e-26		39.039	0.06805
										39.0891	0		38.5255	3.08241e-26		39.0891	0.06747
										39.1391	0		38.5736	2.55745e-26		39.1391	0.0669
										39.1892	0		38.6216	2.12125e-26		39.1892	0.06633
										39.2392	0		38.6697	1.75892e-26		39.2392	0.06576
										39.2893	0		38.7177	1.45804e-26		39.2893	0.0652
										39.3393	0		38.7658	1.20826e-26		39.3393	0.06463
										39.3894	0		38.8138	1.00096e-26		39.3894	0.06407
										39.4394	0		38.8619	8.28984e-27		39.4394	0.06351
										39.4895	0		38.9099	6.86344e-27		39.4895	0.06295
										39.5395	0		38.958	5.68075e-27		39.5395	0.06239
										39.5896	0		39.006	4.70044e-27		39.5896	0.06183
										39.6396	0		39.054	3.88811e-27		39.6396	0.06128
										39.6897	0		39.1021	3.2152e-27		39.6897	0.06073
										39.7397	0		39.1501	2.65794e-27		39.7397	0.06018
										39.7898	0		39.1982	2.1966e-27		39.7898	0.05963
										39.8398	0		39.2463	1.81479e-27		39.8398	0.05909
										39.8899	0		39.2943	1.49889e-27		39.8899	0.05855
										39.9399	0		39.3423	1.2376e-27		39.9399	0.05801
										39.99	0		39.3904	1.02155e-27		39.99	0.05747
										40.04	0		39.4384	8.42959e-28		40.04	0.05693
										40.0901	0		39.4865	6.95381e-28		40.0901	0.0564
										40.1401	0		39.5345	5.73465e-28		40.1401	0.05587
										40.1902	0		39.5826	4.72781e-28		40.1902	0.05534
										40.2402	0		39.6306	3.89656e-28		40.2402	0.05482
										40.2903	0		39.6787	3.21048e-28		40.2903	0.05429
										40.3403	0		39.7267	2.64441e-28		40.3403	0.05377
										40.3904	0		39.7748	2.17748e-28		40.3904	0.05325
										40.4404	0		39.8228	1.79246e-28		40.4404	0.05274
										40.4905	0		39.8709	1.47507e-28		40.4905	0.05222
										40.5405	0		39.9189	1.21351e-28		40.5405	0.05171
										40.5906	0		39.967	9.98029e-29		40.5906	0.0512
										40.6406	0		40.015	8.20562e-29		40.6406	0.0507
										40.6907	0		40.0631	6.74447e-29		40.6907	0.05019
										40.7407	0		40.1111	5.54182e-29		40.7407	0.04969
										40.7908	0		40.1592	4.55225e-29		40.7908	0.0492
										40.8408	0		40.2072	3.73824e-29		40.8408	0.0487
										40.8909	0		40.2553	3.06886e-29		40.8909	0.04821
										40.9409	0		40.3033	2.51858e-29		40.9409	0.04772
										40.991	0		40.3513	2.06634e-29		40.991	0.04723
										41.041	0		40.3994	1.69479e-29		41.041	0.04675
										41.0911	0		40.4475	1.38963e-29		41.0911	0.04627
										41.1411	0		40.4955	1.13907e-29		41.1411	0.04579
										41.1912	0		40.5435	9.33409e-30		41.1912	0.04531
										41.2412	0		40.5916	7.64646e-30		41.2412	0.04484
										41.2913	0		40.6396	6.26206e-30		41.2913	0.04437
										41.3413	0		40.6877	5.12675e-30		41.3413	0.0439
										41.3914	0		40.7357	4.196e-30		41.3914	0.04344
										41.4414	0		40.7838	3.43319e-30		41.4414	0.04298
										41.4915	0		40.8318	2.8082e-30		41.4915	0.04252
										41.5415	0		40.8799	2.29629e-30		41.5415	0.04206
										41.5916	0		40.9279	1.87713e-30		41.5916	0.04161
										41.6416	0		40.976	1.53401e-30		41.6416	0.04116
										41.6917	0		41.024	1.25323e-30		41.6917	0.04071
										41.7417	0		41.0721	1.02354e-30		41.7417	0.04027
										41.7918	0		41.1201	8.35689e-31		41.7918	0.03983
										41.8418	0		41.1682	6.82108e-31		41.8418	0.03939
										41.8919	0		41.2162	5.56584e-31		41.8919	0.03896
										41.9419	0		41.2643	4.54021e-31		41.9419	0.03853
										41.992	0		41.3123	3.70246e-31		41.992	0.0381
										42.042	0		41.3604	3.01837e-31		42.042	0.03767
										42.0921	0		41.4084	2.45993e-31		42.0921	0.03725
										42.1421	0		41.4565	2.0042e-31		42.1421	0.03683
										42.1922	0		41.5045	1.63241e-31		42.1922	0.03641
										42.2422	0		41.5525	1.32918e-31		42.2422	0.036
										42.2923	0		41.6006	1.08195e-31		42.2923	0.03559
										42.3423	0		41.6487	8.80442e-32		42.3423	0.03518
										42.3924	0		41.6967	7.16245e-32		42.3924	0.03477
										42.4424	0		41.7447	5.82493e-32		42.4424	0.03437
										42.4925	0		41.7928	4.73574e-32		42.4925	0.03397
										42.5425	0		41.8408	3.84905e-32		42.5425	0.03358
										42.5926	0		41.8889	3.12743e-32		42.5926	0.03319
										42.6426	0		41.9369	2.54033e-32		42.6426	0.0328
										42.6927	0		41.985	2.06282e-32		42.6927	0.03241
										42.7427	0		42.033	1.67456e-32		42.7427	0.03203
										42.7928	0		42.0811	1.35897e-32		42.7928	0.03165
										42.8428	0		42.1291	1.10252e-32		42.8428	0.03127
										42.8929	0		42.1772	8.94188e-33		42.8929	0.03089
										42.9429	0		42.2252	7.25006e-33		42.9429	0.03052
										42.993	0		42.2733	5.87656e-33		42.993	0.03015
										43.043	0		42.3213	4.76181e-33		43.043	0.02979
										43.0931	0		42.3694	3.85736e-33		43.0931	0.02943
										43.1431	0		42.4174	3.12375e-33		43.1431	0.02907
										43.1932	0		42.4655	2.5289e-33		43.1932	0.02871
										43.2432	0		42.5135	2.0467e-33		43.2432	0.02836
										43.2933	0		42.5616	1.65594e-33		43.2933	0.02801
										43.3433	0		42.6096	1.33938e-33		43.3433	0.02766
										43.3934	0		42.6577	1.08301e-33		43.3934	0.02732
										43.4434	0		42.7057	8.75445e-34		43.4434	0.02698
										43.4935	0		42.7537	7.07447e-34		43.4935	0.02664
										43.5435	0		42.8018	5.71514e-34		43.5435	0.02631
										43.5936	0		42.8499	4.6156e-34		43.5936	0.02597
										43.6436	0		42.8979	3.72647e-34		43.6436	0.02564
										43.6937	0		42.946	3.00771e-34		43.6937	0.02532
										43.7437	0		42.994	2.42685e-34		43.7437	0.025
										43.7938	0		43.042	1.95757e-34		43.7938	0.02468
										43.8438	0		43.0901	1.57856e-34		43.8438	0.02436
										43.8939	0		43.1381	1.27254e-34		43.8939	0.02404
										43.9439	0		43.1862	1.02554e-34		43.9439	0.02373
										43.994	0		43.2342	8.2623e-35		43.994	0.02342
										44.044	0		43.2823	6.65453e-35		44.044	0.02312
										44.0941	0		43.3303	5.358e-35		44.0941	0.02282
										44.1441	0		43.3784	4.31277e-35		44.1441	0.02252
										44.1942	0		43.4264	3.47039e-35		44.1942	0.02222
										44.2442	0		43.4745	2.7917e-35		44.2442	0.02193
										44.2943	0		43.5225	2.24505e-35		44.2943	0.02164
										44.3443	0		43.5706	1.8049e-35		44.3443	0.02135
										44.3944	0		43.6186	1.4506e-35		44.3944	0.02106
										44.4444	0		43.6667	1.1655e-35		44.4444	0.02078
										44.4945	0		43.7147	9.36147e-36		44.4945	0.0205
										44.5445	0		43.7628	7.517e-36		44.5445	0.02022
										44.5946	0		43.8108	6.03411e-36		44.5946	0.01995
										44.6446	0		43.8589	4.84228e-36		44.6446	0.01968
										44.6947	0		43.9069	3.88468e-36		44.6947	0.01941
										44.7447	0		43.9549	3.11551e-36		44.7447	0.01914
										44.7948	0		44.003	2.49788e-36		44.7948	0.01888
										44.8448	0		44.051	2.00208e-36		44.8448	0.01862
										44.8949	0		44.0991	1.60421e-36		44.8949	0.01836
										44.9449	0		44.1472	1.28502e-36		44.9449	0.01811
										44.995	0		44.1952	1.02902e-36		44.995	0.01786
										45.0451	0		44.2432	8.23773e-37		45.0451	0.01761
										45.0951	0		44.2913	6.59265e-37		45.0951	0.01736
										45.1452	0		44.3393	5.27449e-37		45.1452	0.01712
										45.1952	0		44.3874	4.21861e-37		45.1952	0.01688
										45.2452	0		44.4354	3.37308e-37		45.2452	0.01664
										45.2953	0		44.4835	2.69621e-37		45.2953	0.0164
										45.3454	0		44.5315	2.1545e-37		45.3454	0.01617
										45.3954	0		44.5796	1.72111e-37		45.3954	0.01594
										45.4455	0		44.6276	1.37449e-37		45.4455	0.01571
										45.4955	0		44.6757	1.09734e-37		45.4955	0.01548
										45.5455	0		44.7237	8.75805e-38		45.5455	0.01526
										45.5956	0		44.7718	6.98784e-38		45.5956	0.01504
										45.6457	0		44.8198	5.57375e-38		45.6457	0.01482
										45.6957	0		44.8679	4.44447e-38		45.6957	0.0146
										45.7458	0		44.9159	3.54292e-38		45.7458	0.01439
										45.7958	0		44.964	2.82339e-38		45.7958	0.01418
										45.8458	0		45.012	2.24931e-38		45.8458	0.01397
										45.8959	0		45.0601	1.79141e-38		45.8959	0.01376
										45.946	0		45.1081	1.42629e-38		45.946	0.01356
										45.996	0		45.1562	1.13525e-38		45.996	0.01336
										46.0461	0		45.2042	9.03323e-39		46.0461	0.01316
										46.0961	0		45.2522	7.18559e-39		46.0961	0.01296
										46.1461	0		45.3003	5.71414e-39		46.1461	0.01277
										46.1962	0		45.3484	4.54262e-39		46.1962	0.01258
										46.2463	0		45.3964	3.6102e-39		46.2463	0.01239
										46.2963	0		45.4444	2.8683e-39		46.2963	0.0122
										46.3464	0		45.4925	2.27817e-39		46.3464	0.01202
										46.3964	0		45.5405	1.8089e-39		46.3964	0.01183
										46.4464	0		45.5886	1.43587e-39		46.4464	0.01165
										46.4965	0		45.6366	1.13941e-39		46.4965	0.01147
										46.5466	0		45.6847	9.03889e-40		46.5466	0.0113
										46.5966	0		45.7327	7.16833e-40		46.5966	0.01112
										46.6467	0		45.7808	5.68316e-40		46.6467	0.01095
										46.6967	0		45.8288	4.50432e-40		46.6967	0.01078
										46.7467	0		45.8769	3.56893e-40		46.7467	0.01062
										46.7968	0		45.9249	2.82693e-40		46.7968	0.01045
										46.8469	0		45.973	2.23851e-40		46.8469	0.01029
										46.8969	0		46.021	1.77204e-40		46.8969	0.01013
										46.947	0		46.0691	1.40234e-40		46.947	0.00997
										46.997	0		46.1171	1.10944e-40		46.997	0.00981
										47.047	0		46.1652	8.77452e-41		47.047	0.00965
										47.0971	0		46.2132	6.93761e-41		47.0971	0.0095
										47.1472	0		46.2613	5.48359e-41		47.1472	0.00935
										47.1972	0		46.3093	4.333e-41		47.1972	0.0092
										47.2473	0		46.3574	3.42279e-41		47.2473	0.00905
										47.2973	0		46.4054	2.70297e-41		47.2973	0.00891
										47.3473	0		46.4534	2.13388e-41		47.3473	0.00876
										47.3974	0		46.5015	1.68409e-41		47.3974	0.00862
										47.4475	0		46.5496	1.32872e-41		47.4475	0.00848
										47.4975	0		46.5976	1.04801e-41		47.4975	0.00835
										47.5476	0		46.6457	8.26357e-42		47.5476	0.00821
										47.5976	0		46.6937	6.51386e-42		47.5976	0.00808
										47.6476	0		46.7417	5.13307e-42		47.6476	0.00794
										47.6977	0		46.7898	4.04375e-42		47.6977	0.00781
										47.7478	0		46.8378	3.18463e-42		47.7478	0.00768
										47.7978	0		46.8859	2.50728e-42		47.7978	0.00756
										47.8479	0		46.9339	1.9734e-42		47.8479	0.00743
										47.8979	0		46.982	1.55273e-42		47.8979	0.00731
										47.9479	0		47.03	1.22136e-42		47.9479	0.00719
										47.998	0		47.0781	9.60423e-43		47.998	0.00707
										48.0481	0		47.1261	7.55003e-43		48.0481	0.00695
										48.0981	0		47.1742	5.93338e-43		48.0981	0.00683
										48.1482	0		47.2222	4.66149e-43		48.1482	0.00672
										48.1982	0		47.2703	3.66113e-43		48.1982	0.0066
										48.2482	0		47.3183	2.87458e-43		48.2482	0.00649
										48.2983	0		47.3664	2.25633e-43		48.2983	0.00638
										48.3484	0		47.4144	1.77051e-43		48.3484	0.00627
										48.3984	0		47.4625	1.38887e-43		48.3984	0.00617
										48.4485	0		47.5105	1.08917e-43		48.4485	0.00606
										48.4985	0		47.5586	8.53879e-44		48.4985	0.00596
										48.5485	0		47.6066	6.69215e-44		48.5485	0.00585
										48.5986	0		47.6546	5.24328e-44		48.5986	0.00575
										48.6487	0		47.7027	4.10685e-44		48.6487	0.00565
										48.6987	0		47.7507	3.21576e-44		48.6987	0.00556
										48.7488	0		47.7988	2.51725e-44		48.7488	0.00546
										48.7988	0		47.8469	1.96987e-44		48.7988	0.00536
										48.8488	0		47.8949	1.54105e-44		48.8488	0.00527
										48.8989	0		47.9429	1.20522e-44		48.8989	0.00518
										48.949	0		47.991	9.42282e-45		48.949	0.00509
										48.999	0		48.039	7.36488e-45		48.999	0.005
										49.0491	0		48.0871	5.75465e-45		49.0491	0.00491
										49.0991	0		48.1351	4.49511e-45		49.0991	0.00482
										49.1491	0		48.1832	3.51018e-45		49.1491	0.00474
										49.1992	0		48.2312	2.74023e-45		49.1992	0.00465
										49.2493	0		48.2793	2.13852e-45		49.2493	0.00457
										49.2993	0		48.3273	1.66843e-45		49.2993	0.00449
										49.3494	0		48.3754	1.30128e-45		49.3494	0.00441
										49.3994	0		48.4234	1.01462e-45		49.3994	0.00433
										49.4494	0		48.4715	7.90867e-46		49.4494	0.00425
										49.4995	0		48.5195	6.16271e-46		49.4995	0.00417
										49.5496	0		48.5676	4.80074e-46		49.5496	0.0041
										49.5996	0		48.6156	3.73864e-46		49.5996	0.00402
										49.6497	0		48.6637	2.91063e-46		49.6497	0.00395
										49.6997	0		48.7117	2.26531e-46		49.6997	0.00388
										49.7497	0		48.7598	1.76254e-46		49.7497	0.00381
										49.7998	0		48.8078	1.37093e-46		49.7998	0.00374
										49.8499	0		48.8559	1.06601e-46		49.8499	0.00367
										49.8999	0		48.9039	8.28664e-47		49.8999	0.0036
										49.95	0		48.9519	6.43964e-47		49.95	0.00353
										50	0		49	5.00281e-47		50	0.00347

## Sheet: Figure 3I
	Figure 2I
	Arp2/3 dwell time for 1020 Pa growth stress networks				Arp2/3 bleaching and loss of tracking control
	Arp2/3 dwell time; bin center [s]	Relative frequency			Arp2/3 dwell time; bin center [s]	Relative frequency
	6	0.04747			2	0.01825
	10	0.06962			6	0.02555
	14	0.07278			10	0.0438
	18	0.11709			14	0.03285
	22	0.08544			18	0.0438
	26	0.11076			22	0.04745
	30	0.15823			26	0.04015
	34	0.12342			30	0.04745
	38	0.07278			34	0.05109
	42	0.0443			38	0.04015
	46	0.00949			42	0.05839
	50	0.01582			46	0.06934
					50	0.04015
					54	0.0438
					58	0.0292
					62	0.0365
					66	0.03285
					70	0.02555
					74	0.01825
					78	0.04745
					82	0.04015
					86	0.01825
					90	0.03285
					94	0.01825
					98 and longer	0.09854
