# Supplementary material for: The molecular mechanism of load adaptation by branched actin networks
Source: eLife. 2022 Jun 24;11:e73145. doi: 10.7554/eLife.73145 (PMC9328761; doi:10.7554/eLife.73145)
Supplement: Figure 4—source data 1. [file elife-73145-fig4-data1.xlsx]

## Sheet: Figure 4C
	Figure 4C
		control networks (0 Pa growth stress)		255 Pa growth stress networks		1020 Pa growth stress networks
	time[s]	normalized Alexa488-WAVE1 intensity[au]	SEM normalized Alexa488-WAVE1 intensity[au]	normalized Alexa488-WAVE1 intensity[au]	SEM normalized Alexa488-WAVE1 intensity[au]	normalized Alexa488-WAVE1 intensity[au]	SEM normalized Alexa488-WAVE1 intensity[au]
	0	1.01225	0.00328032	1.01707	0.0208477	1.02008	0.0130346
	20	0.831705	0.0140107	0.845455	0.0133336	0.576838	0.0456884
	40	0.709063	0.00350637	0.671438	0.026003	0.423441	0.0457145
	60	0.629706	0.00240161	0.557932	0.0260045	0.363579	0.0379673
	80	0.576867	0.0022698	0.490345	0.0235	0.330492	0.0342007
	100	0.542601	0.00983565	0.448685	0.0233771	0.297374	0.0326626
	120	0.506691	0.0102457	0.420123	0.0170282	0.2928	0.0316017
	140	0.483509	0.0161145	0.387426	0.0225956	0.279788	0.0245092
	160	0.43348	0.00903358	0.359128	0.0165684	0.27252	0.0229927
	180	0.430989	0.0176882	0.33727	0.0222153	0.25361	0.0195383
	200	0.412688	0.0128136	0.31841	0.019963	0.244573	0.0212652
	220	0.404663	0.022835	0.314482	0.023866	0.243809	0.0191512
	240	0.384132	0.029912	0.300042	0.0214609	0.230847	0.0158341
	260	0.397437	0.0260248	0.284691	0.0242476	0.237732	0.0203574
	280	0.373611	0.0351204	0.297964	0.0172212	0.231515	0.019629
	300	0.360047	0.0227515	0.282704	0.0177963	0.220747	0.0195498
	320	0.352313	0.0179833	0.26816	0.0208762	0.218841	0.0158352
	340	0.356132	0.0365317	0.260293	0.0171381	0.213119	0.0159061
	360	0.335676	0.0331113	0.264603	0.0185295	0.211813	0.0157539
	380	0.334487	0.0254224	0.253668	0.0170932	0.213673	0.016127
	400	0.332387	0.0247962	0.248251	0.0212149	0.192871	0.0136251
	420	0.324348	0.0273949	0.249073	0.0170189	0.189359	0.0161953
	440	0.318819	0.025746	0.240769	0.0158098	0.195294	0.0161418
	460	0.308839	0.0249281	0.239764	0.0139072	0.198002	0.0134428
	480	0.304215	0.0235299	0.23634	0.0145713	0.187342	0.013023
	500	0.297992	0.0221906	0.229121	0.0126638	0.188931	0.010548

## Sheet: Figure 4D
	Figure 4D
		mean % BE associated NPF
	condition	sample 1	sample 2	sample 3	sample 4	sample 5		mean % BE associated NPF	SEM % BE associated NPF
	no actin network	0.39258	4.0517	9.15001	-8.77465	-4.81964		2.30926e-15	3.16636
	actin network; 0Pa growth stress	11.7047	10.2364	5.77568	1.53172			7.31212	2.30253
	actin network; 1276Pa growth stress	33.4761	18.1686	30.1267				27.2571	4.64598
