# Supplementary material for: The molecular mechanism of load adaptation by branched actin networks
Source: eLife. 2022 Jun 24;11:e73145. doi: 10.7554/eLife.73145 (PMC9328761; doi:10.7554/eLife.73145)
Supplement: Figure 5—figure supplement 1—source data 1. [file elife-73145-fig5-figsupp1-data1.xlsx]

## Sheet: Figure 5 - Figure Supplement 1B
	Figure 5 - Figure Supplement 1B
	CP concentration [nM]	mean actin:CP fluorescence ratio [au]	SD mean actin:CP fluorescence ratio [au]
	30	2.57143	0.45063
	55	1.60407	0.5097
	100	0.84899	0.02095
	180	0.5005	0.1522

## Sheet: Figure 5 - Figure Supplement 1C
	Figure 5 - Figure Supplement 1C
		30nM CP		55nM CP		100nM CP		180nM CP
	growth stress[Pa]	relative growth velocity [au]	SEM relative growth velocity [au]	relative growth velocity [au]	SEM relative growth velocity [au]	relative growth velocity [au]	SEM relative growth velocity [au]	relative growth velocity [au]	SEM relative growth velocity [au]
	25.5102	0.78636	0.17073	0.87749	0.08446	1	0.08255	1.23872	0.17173
	51.0204	0.63279	0.14207	0.72453	0.05968	0.79285	0.08241	1.00809	0.17092
	102.041	0.44026	0.10081	0.58231	0.04982	0.57161	0.08871	0.74615	0.16178
	255.102	0.27837	0.06556	0.36026	0.03624	0.35194	0.04893	0.46726	0.11328
	510.204	0.17088	0.03617	0.21803	0.02948	0.19176	0.02434	0.27472	0.0732
	765.306	0.11244	0.02441	0.13921	0.02424	0.12132	0.02027	0.1851	0.04417
	1020.41	0.07879	0.01894	0.09666	0.02631	0.08688	0.01257	0.12773	0.02295

## Sheet: Figure 5 - Figure Supplement 1D
	Figure 5 - Figure Supplement 1D
		30nM CP		55nM CP		100nM CP		180nM CP
	growth stress[Pa]	actin flux [au]	SEM actin flux [au]	actin flux [au]	SEM actin flux [au]	actin flux [au]	SEM actin flux [au]	actin flux [au]	SEM actin flux [au]
	25.5102	661.358	73.3293	743.438	228.492	645.45	25.3353	887.424	246.649
	51.0204	688.396	47.0461	762.835	236.321	678.242	7.09318	900.807	238.24
	102.041	666.258	52.7197	795.386	217.246	700.588	14.1641	895.252	199.789
	255.102	591.883	52.5692	708.129	127.515	652.338	30.033	881.512	103.34
	510.204	583.08	29.8073	702.031	120.02	608.479	58.7713	763.066	84.5685
	765.306	491.168	22.7867	599.759	100.421	431.875	38.7563	587.123	158.936
	1020.41	407.944	25.1319	399.507	195.093	357.577	45.7255	460.672	117.228

## Sheet: Figure 5 - Figure Supplement 1E
	Figure 5 - Figure Supplement 1E
		30nM CP		55nM CP		100nM CP		180nM CP
	growth stress[Pa]	Arp2/3 flux [au]	SEM Arp2/3 flux [au]	Arp2/3 flux [au]	SEM Arp2/3 flux [au]	Arp2/3 flux [au]	SEM Arp2/3 flux [au]	Arp2/3 flux [au]	SEM Arp2/3 flux [au]
	25.5102	231.184	41.3223	408.777	13.6508	610.121	33.5689	1216.92	238.388
	51.0204	233.376	36.4574	405.788	30.2675	589.512	12.3371	1222.96	271.676
	102.041	218.642	29.635	366.718	34.8355	567.305	11.593	1146.54	283.865
	255.102	184.902	14.9857	332.215	39.5708	381.244	23.4928	883.908	165.921
	510.204	172.638	13.3584	284.147	9.05924	377.707	21.7075	687.763	116.309
	765.306	157.576	18.1385	309.835	24.4095	320.658	3.94239	583.572	139.477
	1020.41	136.172	19.8025	193.247	101.839	284.444	16.0221	478.479	104.946
