# Supplementary material for: The molecular mechanism of load adaptation by branched actin networks
Source: eLife. 2022 Jun 24;11:e73145. doi: 10.7554/eLife.73145 (PMC9328761; doi:10.7554/eLife.73145)
Supplement: Figure 5—figure supplement 2—source data 1. [file elife-73145-fig5-figsupp2-data1.xlsx]

## Sheet: Figure 5 - Figure Supplement 2A
	Figure 5 - Figure Supplement 2A
		control (no CP)	CP (wt), 30nM	GST-CP, 30nM	NusA-CP, 30nM
	time [s]	normalized pyrene fluorescence [au]	normalized pyrene fluorescence [au]	normalized pyrene fluorescence [au]	normalized pyrene fluorescence [au]
	0	0	0	0	0
	5	0	0	0	0
	10	0	0	0	0
	15	0	0	0	0
	20	0	0	0	0
	25	0	0	0	0
	30	0	0	0	0
	35	0	0	0	0
	40	0	0	0	0
	45	0	0	0	0
	50	0	0	0	0
	55	0	0	0	0
	60	0	0.01277	0	0
	65	0	0.01162	0.00334	0
	70	0	0.00449	0.01599	0
	75	0	0.01427	0.01641	0
	80	0	0.02014	0.01306	0
	85	0	0.03521	0.01338	0
	90	0.00489	0.0359	0.0093	0
	95	0.01162	0.03325	0.01724	0.01914
	100	0.0076	0.03095	0.01066	0.01946
	105	0.02194	0.02819	0.01651	0.02616
	110	0.0063	0.03084	0.0117	0.02184
	115	0.01857	0.03199	0.01369	0.03114
	120	0.01575	0.03061	0.01066	0.02065
	125	0.00402	0.02117	0.01964	0.02033
	130	0.0164	0.02382	0.0209	0.01654
	135	0.01151	0.03578	0.02163	0.01979
	140	0.01901	0.03187	0.01505	0.01568
	145	0.01629	0.02025	0.01526	0
	150	0.02422	0.03728	0.01766	0.0133
	155	0.02944	0.02577	0.01797	0.000540599
	160	0.01684	0.02658	0.02853	0.00811
	165	0.03139	0.03003	0.03229	0.00573
	170	0.01705	0.03613	0.01641	0.01124
	175	0.02238	0.04119	0.03229	0.02303
	180	0.01477	0.04936	0.02978	0.02271
	185	0.00999	0.02957	0.03584	0.02368
	190	0.01988	0.03889	0.03438	0.02379
	195	0.01271	0.04073	0.03124	0.02616
	200	0.02987	0.04165	0.04295	0.000973078
	205	0.03574	0.04729	0.03668	0.02216
	210	0.02987	0.05903	0.03939	0.01708
	215	0.02411	0.0634	0.04086	0.02844
	220	0.0365	0.06041	0.04033	0.02
	225	0.03802	0.06489	0.05057	0.01957
	230	0.02694	0.06984	0.05716	0.02184
	235	0.03009	0.06662	0.0418	0.02206
	240	0.03965	0.06731	0.04984	0.02908
	245	0.03041	0.06996	0.06061	0.03579
	250	0.02889	0.06248	0.04869	0.03373
	255	0.04486	0.07686	0.05632	0.02584
	260	0.03682	0.06559	0.06479	0.04044
	265	0.04073	0.0741	0.06061	0.0306
	270	0.02857	0.08825	0.06614	0.03406
	275	0.02911	0.0802	0.07273	0.04011
	280	0.03096	0.08158	0.0814	0.04844
	285	0.02846	0.09884	0.07868	0.03849
	290	0.03183	0.08929	0.07879	0.04076
	295	0.03715	0.08169	0.08391	0.05157
	300	0.03172	0.0932	0.08401	0.05903
	305	0.03932	0.10333	0.09112	0.04725
	310	0.0491	0.08768	0.08966	0.04725
	315	0.04225	0.10839	0.0977	0.07006
	320	0.0416	0.1146	0.09885	0.06044
	325	0.04421	0.11334	0.10376	0.06336
	330	0.0504	0.09424	0.10773	0.06466
	335	0.04356	0.10977	0.10993	0.08033
	340	0.04269	0.10758	0.11264	0.08769
	345	0.04138	0.12461	0.10418	0.07644
	350	0.0416	0.12565	0.12038	0.08596
	355	0.0454	0.11978	0.11463	0.08044
	360	0.05029	0.12473	0.12748	0.09428
	365	0.04758	0.12243	0.12059	0.10607
	370	0.05007	0.12956	0.1325	0.10888
	375	0.03943	0.14567	0.13615	0.09796
	380	0.04649	0.13324	0.13511	0.10434
	385	0.03693	0.14014	0.14775	0.10661
	390	0.0504	0.13727	0.14901	0.10628
	395	0.04301	0.13968	0.13898	0.0946
	400	0.0554	0.14153	0.14587	0.1039
	405	0.04584	0.13658	0.16499	0.10466
	410	0.05018	0.14417	0.15862	0.11115
	415	0.04986	0.14578	0.14848	0.12239
	420	0.06137	0.1635	0.16186	0.12099
	425	0.05453	0.1459	0.17001	0.12812
	430	0.05909	0.15706	0.17827	0.13731
	435	0.06017	0.16086	0.17816	0.13829
	440	0.06137	0.1566	0.18558	0.12931
	445	0.06398	0.14636	0.19216	0.15461
	450	0.05616	0.15971	0.1814	0.14531
	455	0.06571	0.16419	0.19227	0.13731
	460	0.06517	0.15706	0.20721	0.1332
	465	0.07679	0.16914	0.19561	0.14866
	470	0.08114	0.1826	0.21108	0.14996
	475	0.06669	0.17812	0.21338	0.16705
	480	0.07028	0.19227	0.21724	0.15904
	485	0.05941	0.16972	0.2094	0.16013
	490	0.07853	0.1925	0.20846	0.17061
	495	0.07951	0.20274	0.21975	0.18272
	500	0.07039	0.20228	0.21985	0.17169
	505	0.07212	0.20308	0.23417	0.18143
	510	0.0617	0.20527	0.23657	0.17742
	515	0.07071	0.20585	0.24148	0.17634
	520	0.07125	0.21229	0.24201	0.19148
	525	0.07875	0.21505	0.24305	0.1957
	530	0.06745	0.20815	0.2442	0.19505
	535	0.07375	0.21263	0.25434	0.19883
	540	0.07983	0.22679	0.25737	0.20662
	545	0.07918	0.22541	0.26677	0.20359
	550	0.08266	0.21551	0.25778	0.20218
	555	0.07679	0.23841	0.25946	0.21018
	560	0.07582	0.24416	0.2675	0.21116
	565	0.07288	0.23081	0.26614	0.21548
	570	0.08787	0.24543	0.28046	0.21808
	575	0.08179	0.24151	0.28025	0.23473
	580	0.08244	0.25026	0.27691	0.23819
	585	0.09146	0.26372	0.286	0.23559
	590	0.09243	0.25187	0.28474	0.24316
	595	0.09233	0.26326	0.29269	0.23992
	600	0.09884	0.2506	0.30334	0.23484
	605	0.08396	0.25808	0.29833	0.26306
	610	0.09971	0.27994	0.3069	0.25451
	615	0.10362	0.27615	0.31024	0.26262
	620	0.08907	0.28328	0.31985	0.26241
	625	0.09091	0.27339	0.31484	0.27852
	630	0.09167	0.27465	0.33824	0.2663
	635	0.09721	0.28708	0.31808	0.28727
	640	0.09548	0.28708	0.32153	0.28198
	645	0.09363	0.29375	0.33239	0.28414
	650	0.08766	0.3056	0.33532	0.28479
	655	0.10775	0.30595	0.33678	0.28879
	660	0.09461	0.31274	0.33668	0.29528
	665	0.11025	0.3048	0.33177	0.29679
	670	0.10829	0.29651	0.33845	0.29982
	675	0.09634	0.30595	0.35747	0.31052
	680	0.1096	0.32574	0.36594	0.31571
	685	0.116	0.32516	0.3559	0.32749
	690	0.11307	0.32068	0.35967	0.31279
	695	0.10992	0.32551	0.36008	0.32274
	700	0.09439	0.32931	0.38349	0.32317
	705	0.11557	0.32079	0.36489	0.31971
	710	0.11079	0.33667	0.38297	0.34112
	715	0.12013	0.34162	0.38433	0.3382
	720	0.12187	0.32919	0.39791	0.34328
	725	0.11937	0.356	0.38652	0.34501
	730	0.12013	0.35128	0.39488	0.3449
	735	0.12078	0.36405	0.39676	0.34955
	740	0.12383	0.34875	0.39634	0.36988
	745	0.10981	0.36728	0.40324	0.36436
	750	0.11687	0.36958	0.41327	0.35117
	755	0.11155	0.36739	0.4162	0.36912
	760	0.12502	0.36935	0.40219	0.36988
	765	0.1298	0.38131	0.41735	0.38123
	770	0.12871	0.37901	0.42215	0.37896
	775	0.12241	0.36981	0.42759	0.38166
	780	0.12535	0.37683	0.42978	0.37712
	785	0.1248	0.38108	0.44054	0.38653
	790	0.13458	0.38408	0.43271	0.39788
	795	0.13317	0.39098	0.42497	0.39269
	800	0.12263	0.39432	0.44608	0.39875
	805	0.13349	0.40053	0.44587	0.40772
	810	0.12491	0.40824	0.45047	0.40761
	815	0.1285	0.39823	0.43448	0.41204
	820	0.13621	0.4156	0.43887	0.41486
	825	0.12372	0.41744	0.4534	0.4314
	830	0.1311	0.40847	0.46123	0.41529
	835	0.13328	0.41928	0.47847	0.4048
	840	0.14511	0.4133	0.4837	0.4288
	845	0.14316	0.42987	0.46991	0.4274
	850	0.13338	0.42354	0.46395	0.43291
	855	0.14273	0.43758	0.47534	0.44102
	860	0.14142	0.43309	0.46729	0.44243
	865	0.14066	0.42975	0.4745	0.44437
	870	0.14816	0.44046	0.48798	0.45659
	875	0.14403	0.43977	0.48077	0.45151
	880	0.15109	0.45645	0.49927	0.45854
	885	0.14859	0.4492	0.50731	0.45335
	890	0.14294	0.44897	0.51024	0.45151
	895	0.14349	0.46703	0.49749	0.46654
	900	0.14729	0.45979	0.50481	0.47735
	905	0.14946	0.46692	0.51411	0.4847
	910	0.15033	0.47589	0.51578	0.46221
	915	0.15728	0.46048	0.51985	0.48297
	920	0.14848	0.46036	0.5162	0.47648
	925	0.1537	0.47543	0.52194	0.494
	930	0.15446	0.48188	0.52403	0.49378
	935	0.13447	0.49131	0.52894	0.48157
	940	0.14826	0.4782	0.5279	0.49465
	945	0.15554	0.48947	0.54431	0.49778
	950	0.15109	0.48395	0.53908	0.49
	955	0.16065	0.49615	0.53626	0.50795
	960	0.15033	0.48464	0.55507	0.50027
	965	0.15847	0.49557	0.55569	0.50892
	970	0.15771	0.49787	0.54483	0.50784
	975	0.15858	0.49338	0.56458	0.51379
	980	0.16706	0.50213	0.55601	0.52406
	985	0.17075	0.49914	0.57064	0.5207
	990	0.17021	0.51329	0.56322	0.51465
	995	0.16434	0.51582	0.57544	0.51606
	1000	0.16195	0.50949	0.57064	0.52633
	1005	0.16228	0.51191	0.57189	0.5286
	1010	0.17705	0.51881	0.57785	0.53617
	1015	0.17444	0.52422	0.56928	0.54082
	1020	0.17401	0.52802	0.57712	0.54449
	1025	0.18563	0.52974	0.59509	0.54914
	1030	0.17553	0.52284	0.58579	0.54438
	1035	0.17412	0.53193	0.59634	0.55509
	1040	0.16869	0.51709	0.59979	0.55022
	1045	0.1714	0.5439	0.60522	0.55401
	1050	0.18845	0.53952	0.60261	0.55876
	1055	0.18215	0.54447	0.62048	0.57055
	1060	0.17998	0.55034	0.6047	0.56763
	1065	0.17759	0.54159	0.60721	0.56968
	1070	0.17379	0.54804	0.61609	0.56514
	1075	0.1752	0.55897	0.61076	0.57098
	1080	0.17846	0.55678	0.6117	0.57855
	1085	0.1903	0.5523	0.62268	0.57368
	1090	0.18758	0.57105	0.63448	0.57833
	1095	0.17998	0.57001	0.61515	0.5926
	1100	0.18389	0.57266	0.62853	0.58331
	1105	0.17499	0.58325	0.6466	0.58439
	1110	0.18433	0.5783	0.64566	0.58731
	1115	0.19269	0.59084	0.64232	0.59174
	1120	0.19454	0.56645	0.6302	0.5899
	1125	0.2016	0.57036	0.63062	0.61001
	1130	0.19888	0.57358	0.65444	0.61574
	1135	0.18769	0.57726	0.64347	0.60234
	1140	0.19139	0.56449	0.64911	0.60039
	1145	0.18824	0.58877	0.64556	0.61001
	1150	0.19551	0.59406	0.64389	0.60515
	1155	0.18259	0.59303	0.65998	0.60493
	1160	0.19834	0.58336	0.65611	0.61672
	1165	0.19312	0.59947	0.6558	0.6192
	1170	0.19334	0.59314	0.66594	0.63337
	1175	0.19953	0.61523	0.66249	0.63488
	1180	0.20909	0.60649	0.66353	0.6205
	1185	0.20409	0.61719	0.67607	0.62223
	1190	0.20583	0.60384	0.679	0.62331
	1195	0.19584	0.61305	0.67889	0.64018
	1200	0.20529	0.61731	0.68454	0.63477
	1205	0.20703	0.62317	0.6814	0.64969
	1210	0.20724	0.6264	0.67764	0.63596
	1215	0.21713	0.62375	0.69122	0.64493
	1220	0.21822	0.61374	0.68976	0.64796
	1225	0.2105	0.6287	0.68662	0.67164
	1230	0.21257	0.63514	0.69007	0.66786
	1235	0.21583	0.62352	0.69969	0.65975
	1240	0.19302	0.61765	0.6906	0.66429
	1245	0.21963	0.63364	0.70073	0.65737
	1250	0.20562	0.63951	0.71285	0.65726
	1255	0.21756	0.63422	0.69634	0.67499
	1260	0.20377	0.64354	0.70418	0.67056
	1265	0.20887	0.6318	0.70345	0.65726
	1270	0.20562	0.64043	0.71306	0.66926
	1275	0.2029	0.65159	0.70251	0.66818
	1280	0.21257	0.64895	0.71118	0.67694
	1285	0.20192	0.65297	0.71212	0.68743
	1290	0.20909	0.65643	0.71097	0.66267
	1295	0.20931	0.66598	0.71317	0.66623
	1300	0.21865	0.65585	0.72121	0.69002
	1305	0.20953	0.65516	0.72121	0.68148
	1310	0.24092	0.67012	0.72476	0.6951
	1315	0.22278	0.67253	0.73145	0.68894
	1320	0.213	0.66563	0.72905	0.70829
	1325	0.22419	0.67092	0.72874	0.68764
	1330	0.22397	0.67161	0.72299	0.69467
	1335	0.21311	0.67035	0.72508	0.70018
	1340	0.22658	0.68933	0.7372	0.69391
	1345	0.22332	0.67967	0.73093	0.70202
	1350	0.21995	0.68312	0.73636	0.69954
	1355	0.22712	0.69474	0.74525	0.71759
	1360	0.22419	0.69244	0.74107	0.72213
	1365	0.23429	0.69693	0.73845	0.71154
	1370	0.22734	0.69094	0.74848	0.69726
	1375	0.23114	0.70038	0.74608	0.69478
	1380	0.22897	0.69014	0.76217	0.70527
	1385	0.23549	0.70832	0.76061	0.72602
	1390	0.22962	0.70487	0.7675	0.715
	1395	0.2168	0.69957	0.76489	0.73867
	1400	0.23483	0.70751	0.75329	0.739
	1405	0.24016	0.70567	0.75956	0.73381
	1410	0.23549	0.71476	0.75705	0.72256
	1415	0.24244	0.71062	0.75361	0.73175
	1420	0.24526	0.71511	0.76176	0.73219
	1425	0.24602	0.70705	0.76594	0.74873
	1430	0.24005	0.71004	0.77315	0.73348
	1435	0.23864	0.71844	0.76677	0.7324
	1440	0.2395	0.71683	0.77701	0.73792
	1445	0.24135	0.73087	0.76844	0.735
	1450	0.23103	0.71729	0.77618	0.74592
	1455	0.24103	0.72661	0.77785	0.74116
	1460	0.23864	0.7181	0.77879	0.7364
	1465	0.25124	0.73697	0.78558	0.7537
	1470	0.24743	0.73398	0.78339	0.751
	1475	0.24472	0.74042	0.76541	0.75965
	1480	0.24548	0.73214	0.77868	0.75543
	1485	0.26014	0.74169	0.78067	0.76116
	1490	0.24591	0.73939	0.78913	0.75414
	1495	0.25449	0.74008	0.79498	0.75727
	1500	0.25243	0.7326	0.79331	0.76214
	1505	0.24841	0.74284	0.79237	0.75414
	1510	0.24189	0.74226	0.79582	0.76268
	1515	0.25916	0.74663	0.7999	0.77252
	1520	0.24971	0.74997	0.80104	0.77565
	1525	0.24819	0.75584	0.82017	0.76365
	1530	0.2445	0.74215	0.79728	0.77554
	1535	0.26579	0.74698	0.81149	0.7789
	1540	0.26058	0.74917	0.82905	0.77306
	1545	0.25373	0.7525	0.81014	0.76084
	1550	0.26688	0.76827	0.807	0.76819
	1555	0.25449	0.75699	0.80679	0.78809
	1560	0.2735	0.76401	0.81463	0.78192
	1565	0.25243	0.77413	0.82038	0.78581
	1570	0.25601	0.76021	0.80293	0.77252
	1575	0.26199	0.77126	0.82247	0.78841
	1580	0.26699	0.77436	0.82372	0.7949
	1585	0.26861	0.77782	0.81191	0.79165
	1590	0.26416	0.76516	0.828	0.78992
	1595	0.26199	0.78656	0.8395	0.78754
	1600	0.26503	0.78115	0.82184	0.7949
	1605	0.26286	0.77482	0.82309	0.79284
	1610	0.27166	0.77172	0.83699	0.80084
	1615	0.26622	0.7861	0.82487	0.79825
	1620	0.28154	0.80186	0.8349	0.81241
	1625	0.27372	0.78288	0.83689	0.80917
	1630	0.26807	0.78104	0.83344	0.81003
	1635	0.26047	0.79784	0.84754	0.81674
	1640	0.27144	0.80578	0.83208	0.81241
	1645	0.28556	0.79335	0.83417	0.80592
	1650	0.27578	0.79381	0.83574	0.79382
	1655	0.28969	0.79864	0.85611	0.81706
	1660	0.26905	0.80014	0.8372	0.81717
	1665	0.28274	0.80405	0.84598	0.80917
	1670	0.28458	0.80071	0.8418	0.81825
	1675	0.28002	0.80658	0.83918	0.82593
	1680	0.28502	0.81061	0.85078	0.81241
	1685	0.27839	0.80244	0.85883	0.81544
	1690	0.27654	0.80854	0.84681	0.82798
	1695	0.27926	0.80957	0.85914	0.83166
	1700	0.27166	0.80739	0.85225	0.82052
	1705	0.28241	0.81544	0.84932	0.82268
	1710	0.28404	0.79807	0.85758	0.82777
	1715	0.28838	0.8197	0.86071	0.8203
	1720	0.28111	0.81279	0.85946	0.82106
	1725	0.28795	0.81279	0.8442	0.83144
	1730	0.27872	0.82085	0.8489	0.84939
	1735	0.29284	0.82833	0.85172	0.8349
	1740	0.28274	0.81602	0.85413	0.84204
	1745	0.2697	0.81947	0.8466	0.83317
	1750	0.28947	0.82534	0.85684	0.83306
	1755	0.29447	0.83132	0.8675	0.84301
	1760	0.28458	0.835	0.86249	0.84517
	1765	0.29686	0.81648	0.86479	0.83901
	1770	0.28665	0.82718	0.87095	0.83944
	1775	0.29783	0.83132	0.85622	0.8442
	1780	0.29588	0.84179	0.86301	0.84117
	1785	0.29827	0.84478	0.85998	0.85804
	1790	0.29088	0.83328	0.87795	0.85815
	1795	0.29707	0.84064	0.87231	0.86009
	1800	0.3012	0.83776	0.88098	0.84788
	1805	0.30294	0.83707	0.87764	0.84885
	1810	0.29457	0.83661	0.88328	0.84409
	1815	0.31076	0.84536	0.87858	0.85123
	1820	0.30413	0.84329	0.87764	0.85858
	1825	0.31261	0.85422	0.87158	0.87134
	1830	0.30392	0.83857	0.87712	0.8709
	1835	0.29979	0.84386	0.87503	0.87534
	1840	0.31	0.85399	0.8814	0.86701
	1845	0.29848	0.84846	0.88192	0.8642
	1850	0.30326	0.85157	0.88924	0.86334
	1855	0.31337	0.85962	0.88662	0.86344
	1860	0.3277	0.85986	0.90136	0.87339
	1865	0.31304	0.85123	0.91097	0.87263
	1870	0.31445	0.8518	0.88025	0.87664
	1875	0.29838	0.8587	0.89321	0.87339
	1880	0.31282	0.85445	0.88903	0.88453
	1885	0.31358	0.84685	0.88997	0.87642
	1890	0.31076	0.87631	0.88558	0.87739
	1895	0.30468	0.85663	0.88976	0.88074
	1900	0.31261	0.84996	0.88548	0.88756
	1905	0.31054	0.86101	0.90042	0.89112
	1910	0.31891	0.86135	0.89969	0.87653
	1915	0.30815	0.87435	0.90825	0.8882
	1920	0.31662	0.87619	0.90878	0.88528
	1925	0.31402	0.87378	0.90564	0.8841
	1930	0.32977	0.86503	0.89039	0.87426
	1935	0.32282	0.87596	0.90575	0.86723
	1940	0.30967	0.87343	0.91149	0.87372
	1945	0.3302	0.87171	0.90355	0.88734
	1950	0.32108	0.88183	0.90178	0.89426
	1955	0.32662	0.8648	0.9232	0.90334
	1960	0.31684	0.88609	0.90627	0.88896
	1965	0.32738	0.88528	0.90951	0.89772
	1970	0.33248	0.87631	0.91338	0.90107
	1975	0.31413	0.87205	0.91097	0.8962
	1980	0.31141	0.86503	0.9046	0.89966
	1985	0.30077	0.87412	0.90794	0.89685
	1990	0.32162	0.89506	0.91881	0.90183
	1995	0.32933	0.8862	0.91933	0.88345
	2000	0.3277	0.88805	0.90554	0.89123
	2005	0.33335	0.87113	0.91776	0.8748
	2010	0.32944	0.89127	0.91369	0.89091
	2015	0.31347	0.88344	0.92372	0.89566
	2020	0.3226	0.89161	0.91379	0.91048
	2025	0.33313	0.89794	0.91975	0.91286
	2030	0.32977	0.8984	0.93678	0.90507
	2035	0.33335	0.89806	0.93009	0.91318
	2040	0.34324	0.89058	0.93438	0.91015
	2045	0.33802	0.8862	0.92497	0.90367
	2050	0.33531	0.88712	0.92654	0.90507
	2055	0.34106	0.89518	0.92853	0.89502
	2060	0.33639	0.88425	0.93229	0.90853
	2065	0.33107	0.88758	0.93647	0.91815
	2070	0.33878	0.88735	0.9303	0.91642
	2075	0.34682	0.88471	0.93271	0.91275
	2080	0.32423	0.89875	0.94483	0.92323
	2085	0.34389	0.90312	0.92372	0.90302
	2090	0.32759	0.90381	0.92445	0.90842
	2095	0.33911	0.8938	0.92863	0.91394
	2100	0.3504	0.89771	0.93438	0.91664
	2105	0.33607	0.89702	0.93553	0.92205
	2110	0.34041	0.89932	0.94002	0.90507
	2115	0.34465	0.90507	0.93918	0.91415
	2120	0.34334	0.90692	0.93814	0.92518
	2125	0.33911	0.90565	0.93626	0.90929
	2130	0.33976	0.91244	0.93177	0.92053
	2135	0.33846	0.90968	0.92581	0.91469
	2140	0.35442	0.92245	0.9535	0.92042
	2145	0.34573	0.90197	0.94107	0.91686
	2150	0.35366	0.91808	0.94368	0.92053
	2155	0.34193	0.91865	0.93197	0.92724
	2160	0.34878	0.92475	0.95183	0.91404
	2165	0.35301	0.91531	0.93929	0.91761
	2170	0.33911	0.91025	0.95799	0.92886
	2175	0.34052	0.91336	0.94462	0.92529
	2180	0.33628	0.91002	0.93814	0.92788
	2185	0.33607	0.92233	0.94127	0.93361
	2190	0.33172	0.9106	0.93992	0.93578
	2195	0.34921	0.92475	0.95402	0.92713
	2200	0.33053	0.91773	0.93908	0.93588
	2205	0.35301	0.91416	0.95507	0.92756
	2210	0.34867	0.91888	0.94472	0.9361
	2215	0.34074	0.9198	0.93406	0.92756
	2220	0.34584	0.91992	0.94796	0.93134
	2225	0.35855	0.91773	0.95726	0.9334
	2230	0.34725	0.91416	0.9511	0.93805
	2235	0.34823	0.91716	0.94639	0.95308
	2240	0.3579	0.93349	0.96322	0.95448
	2245	0.35464	0.91969	0.96594	0.95124
	2250	0.36094	0.92429	0.95235	0.9387
	2255	0.35149	0.92947	0.95078	0.94789
	2260	0.34454	0.92705	0.93866	0.93405
	2265	0.35116	0.92475	0.94953	0.94313
	2270	0.35312	0.93465	0.95047	0.93837
	2275	0.36572	0.93315	0.96876	0.93243
	2280	0.36268	0.93499	0.96479	0.95329
	2285	0.35931	0.93764	0.94127	0.94324
	2290	0.35931	0.93085	0.96165	0.94605
	2295	0.35475	0.93959	0.95799	0.94237
	2300	0.3705	0.94235	0.95329	0.95751
	2305	0.35062	0.93867	0.95413	0.93448
	2310	0.35171	0.93902	0.96029	0.94259
	2315	0.37397	0.94212	0.95935	0.95091
	2320	0.36203	0.92763	0.93877	0.93924
	2325	0.38114	0.93096	0.95904	0.94075
	2330	0.36246	0.93775	0.96353	0.94767
	2335	0.35714	0.92786	0.94807	0.96821
	2340	0.37235	0.93361	0.97712	0.96216
	2345	0.35844	0.93131	0.97273	0.95351
	2350	0.37354	0.94327	0.9861	0.95859
	2355	0.36279	0.93591	0.9627	0.96194
	2360	0.36854	0.94074	0.95705	0.95243
	2365	0.35518	0.94201	0.95935	0.95762
	2370	0.37441	0.93925	0.95883	0.95199
	2375	0.36083	0.93683	0.96928	0.96886
	2380	0.36453	0.9435	0.96531	0.97384
	2385	0.37528	0.93649	0.95789	0.96983
	2390	0.36246	0.94178	0.95873	0.97524
	2395	0.37213	0.945	0.95883	0.94886
	2400	0.37256	0.93441	0.96259	0.95459
	2405	0.37006	0.92648	0.96614	0.95621
	2410	0.37419	0.93856	0.97304	0.95967
	2415	0.38614	0.93211	0.9605	0.95545
	2420	0.37484	0.94742	0.96719	0.97751
	2425	0.37202	0.94281	0.95569	0.9534
	2430	0.37072	0.95593	0.96364	0.95848
	2435	0.37061	0.94074	0.95246	0.97124
	2440	0.37756	0.94845	0.9721	0.98346
	2445	0.37148	0.95432	0.96729	0.96475
	2450	0.3692	0.94949	0.96301	0.96237
	2455	0.38104	0.94661	0.96897	0.9681
	2460	0.38147	0.94443	0.97189	0.95502
	2465	0.38712	0.95236	0.96437	0.96659
	2470	0.38636	0.94673	0.95956	0.96789
	2475	0.38201	0.958	0.96071	0.96821
	2480	0.38495	0.95305	0.95653	0.96508
	2485	0.37973	0.9656	0.97095	0.96659
	2490	0.38647	0.96134	0.96614	0.97459
	2495	0.38408	0.95881	0.97429	0.96313
	2500	0.38353	0.95202	0.96782	0.97405
	2505	0.39396	0.95513	0.97691	0.968
	2510	0.39407	0.95121	0.97011	0.96713
	2515	0.38321	0.96134	0.96855	0.98346
	2520	0.38842	0.94673	0.97774	0.96994
	2525	0.39298	0.94926	0.96844	0.96216
	2530	0.38114	0.95075	0.97043	0.96454
	2535	0.39396	0.95305	0.97513	0.9654
	2540	0.37886	0.94604	0.97931	0.96486
	2545	0.37865	0.95305	0.97085	0.97751
	2550	0.39103	0.9633	0.98067	0.96983
	2555	0.38777	0.96974	0.97252	0.98032
	2560	0.37148	0.96456	0.97983	0.97254
	2565	0.38951	0.96042	0.97304	0.97016
	2570	0.38972	0.95409	0.9814	0.96108
	2575	0.37669	0.95075	0.96719	0.98584
	2580	0.39548	0.97089	0.97471	0.98573
	2585	0.40102	0.95662	0.95914	0.98238
	2590	0.39505	0.94753	0.97022	0.97254
	2595	0.40439	0.96433	0.97847	0.97481
	2600	0.39255	0.96813	0.98213	0.97221
	2605	0.40406	0.95398	0.97231	0.97275
	2610	0.39179	0.9595	0.98077	0.96951
	2615	0.40265	0.95685	0.96928	0.98108
	2620	0.40547	0.9679	0.99582	0.97092
	2625	0.38929	0.97572	0.98297	0.96205
	2630	0.39201	0.96134	0.98046	0.97578
	2635	0.39179	0.97653	0.98757	0.97016
	2640	0.39472	0.96571	0.97607	0.96865
	2645	0.39092	0.96732	0.96468	0.98043
	2650	0.40091	0.96893	0.97691	0.98075
	2655	0.41058	0.95225	0.97126	0.97611
	2660	0.407	0.96537	0.979	0.97708
	2665	0.41177	0.96099	0.97492	0.97773
	2670	0.40938	0.96721	0.9908	0.98573
	2675	0.40884	0.96882	0.97273	0.97362
	2680	0.41862	0.971	0.97837	0.98519
	2685	0.40819	0.97607	0.9744	0.96929
	2690	0.40547	0.96859	0.98245	0.97448
	2695	0.41232	0.97917	0.97356	0.98075
	2700	0.40819	0.96928	0.98004	0.98757
	2705	0.4096	0.974	0.96458	0.98486
	2710	0.40428	0.96824	0.99509	0.98649
	2715	0.41492	0.96284	0.97774	0.98184
	2720	0.4146	0.9664	0.99007	0.97989
	2725	0.41851	0.97492	0.97106	0.97794
	2730	0.41427	0.97077	0.98506	0.98454
	2735	0.41438	0.97963	0.98359	0.97481
	2740	0.40895	0.98159	0.9791	0.98032
	2745	0.40776	0.97883	0.9722	0.98519
	2750	0.41395	0.97929	0.97994	0.97967
	2755	0.42188	0.97285	0.98631	0.97654
	2760	0.41025	0.98078	0.97147	0.98973
	2765	0.41601	0.97089	0.96667	0.99222
	2770	0.41145	0.96882	0.98537	0.98162
	2775	0.42752	0.96974	0.97346	0.98562
	2780	0.42144	0.96905	0.98945	0.99276
	2785	0.42622	0.97262	0.97607	0.9893
	2790	0.42676	0.97549	0.97461	0.97675
	2795	0.42959	0.96939	0.99007	0.97902
	2800	0.42948	0.97365	0.99164	0.98638
	2805	0.44175	0.96916	0.98454	0.98951
	2810	0.41807	0.98263	0.98495	0.97502
	2815	0.43219	0.98194	0.98077	0.9787
	2820	0.43524	0.98631	0.98474	0.9853
	2825	0.4361	0.98987	0.98119	0.98476
	2830	0.43263	0.98124	0.9721	0.98346
	2835	0.41297	0.9786	0.9838	0.99113
	2840	0.43372	0.97411	0.98067	0.99492
	2845	0.42807	0.97975	0.98276	0.98767
	2850	0.43458	0.96767	0.99258	1
	2855	0.42503	0.97181	0.98203	0.98259
	2860	0.42676	0.97906	0.97774	0.99059
	2865	0.43991	0.98539	0.98527	0.98627
	2870	0.43198	0.98159	0.98036	0.98713
	2875	0.431	0.98447	0.98485	0.98746
	2880	0.42568	0.97802	0.97304	0.99795
	2885	0.42633	0.97607	0.9791	0.99492
	2890	0.42785	0.97388	1	0.97881
	2895	0.42242	0.98055	0.98025	0.97859
	2900	0.43849	0.98493	0.97325	0.992
	2905	0.43035	0.9664	0.98307	0.97286
	2910	0.41449	0.98723	0.98171	0.98865
	2915	0.4335	0.97388	0.96823	0.97535
	2920	0.43904	0.97446	0.9908	0.98659
	2925	0.42872	0.98251	0.98182	0.98184
	2930	0.43556	0.99068	0.98986	0.99059
	2935	0.44034	0.97779	0.98245	0.9774
	2940	0.43057	0.9847	0.97816	0.9907
	2945	0.43708	1	0.9813	0.99178
	2950	0.43871	0.98205	0.98558	0.99243
	2955	0.43013	0.98009	0.98527	0.97524
	2960	0.4424	0.97273	0.97534	0.98292
	2965	0.42959	0.971	0.9791	0.97643
	2970	0.43969	0.99275	0.97952	0.9813
	2975	0.43882	0.98263	0.97952	0.9907
	2980	0.42981	0.98113	0.98506	0.99243
	2985	0.45522	0.97871	0.98098	0.99416
	--	--	--	--	--
	--	--	--	--	--
	--	--	--	--	--
	--	--	--	--	--

## Sheet: Figure 5 - Figure Supplement 2B
	Figure 5 - Figure Supplement 2B
		Actin fluorescence		CP(wt) fluorescence		GST-CP fluorescence		NusA-CP fluorescence
	growth stress [Pa]	Normalized actin fluorescence [au]	SD Normalized actin fluorescence [au]	Normalized CP (wt) fluorescence [au]	SD Normalized CP (wt) fluorescence [au]	Normalized GST-CP fluorescence [au]	SD Normalized GST-CP fluorescence [au]	Normalized NusA-CP fluorescence [au]	SD Normalized NusA-CP fluorescence [au]
	0	1	0	1	0	1	0	1	0
	25.5102	1.22669	0.06655	1.25355	0.15157	1.1462	0.0707	1.19628	0.07548
	51.0204	1.44478	0.08844	1.4573	0.18725	1.2914	0.07631	1.46525	0.06101
	102.041	1.90924	0.18326	1.85685	0.32778	1.53395	0.13242	1.9073	0.23192
	255.102	3.36139	0.34303	3.09881	0.48226	2.06941	0.21584	3.08166	0.53876
	382.653	4.62928	0.42137	4.15934	0.65079	2.35327	0.32996	3.33581	0.49096
	510.204	5.79154	0.59781	5.08228	0.54591	2.50756	0.3422	4.13534	0.54605
	765.306	8.18641	0.70092	7.01262	0.84996	2.59062	0.35824	4.99456	0.71528
	1020.41	10.5725	0.90824	8.86717	0.79971	2.56123	0.6422	5.59489	0.6422

## Sheet: Figure 5 - Figure Supplement 2C
	Figure 5 - Figure Supplement 2C
		CP(wt)		GST-CP		NusA-CP
	growth stress [Pa]	Normalized filament length [au]	SD Normalized filament length [au]	Normalized filament length [au]	SD Normalized filament length [au]	Normalized filament length [au]	SD Normalized filament length [au]
	0	1	0	1	0	1	0
	25.5102	0.97858	0.13574	1.09365	0.13574	1.07857	0.096
	51.0204	0.99141	0.14143	1.12846	0.14143	1.11836	0.15374
	102.041	1.02821	0.1965	1.2105	0.1965	1.19036	0.19519
	255.102	1.08474	0.18735	1.49743	0.18735	1.2923	0.25519
	382.653	1.11299	0.2101	1.76747	0.2101	1.37502	0.23413
	510.204	1.13956	0.17367	2.02678	0.17367	1.46962	0.29128
	765.306	1.16738	0.18388	2.70693	0.18388	1.66482	0.31432
	1020.41	1.19232	0.26647	3.46207	0.26647	1.65251	0.29627

## Sheet: Figure 5 - Figure Supplement 2D
	Figure 5 - Figure Supplement 2D
			wildtype CP fluorescence intensity [au]				bulky GST-CP fluorescence intensity [au]
	distance [um]		0 Pa network	255 Pa network	1020 Pa network		0 Pa network	255 Pa network	1020 Pa network
	0		3.5706	210.486	516.372		8.7918	221.641	494.452
	0.08333		0	218.93	558.183		45.1311	229.996	502.683
	0.16667		24.5832	263.551	551.89		89.7832	239.355	500.199
	0.25		15.2977	203.149	613.576		106.483	244.065	531.255
	0.33333		27.4006	291.753	561.161		42.0775	212.635	520.168
	0.41667		55.5776	271.506	548.629		84.3128	243.62	520.988
	0.5		38.6353	234.342	559.056		85.6416	225.935	577.168
	0.58333		7.5968	249.333	547.885		82.0791	256.548	521.241
	0.66667		29.9653	257.457	558.574		88.081	248.321	576.421
	0.75		36.6477	260.845	553.162		152.137	276.154	518.495
	0.83333		13.3732	288.589	663.288		102.157	370.749	457.291
	0.91667		0	243.787	563.573		101.179	316.887	524.282
	1		22.2885	242.956	574.577		0	232.598	537.237
	1.08333		12.216	266.95	581.911		68.0067	410.476	531.375
	1.16667		23.18	291.295	622.002		149.935	315.699	523.928
	1.25		26.4035	325.656	644.38		81.6473	267.228	552.896
	1.33333		45.0848	304.207	500.525		0	342.913	617.683
	1.41667		38.3183	275.728	729.724		32.9565	244.86	519.156
	1.5		18.3595	340.506	683.214		27.4667	381.771	569.908
	1.58333		19.783	309.371	715.583		32.7543	329.897	561.827
	1.66667		25.9104	348.909	666.309		6.2206	368.09	664.64
	1.75		22.223	307.836	725.506		2.3535	434.151	728.09
	1.83333		29.615	304.021	767.384		34.0764	305.593	760.344
	1.91667		29.9588	348.016	773.592		0	409.241	787.948
	2		20.1737	330.353	785.086		38.883	394.746	866.205
	2.08333		35.4132	353.277	820.498		26.683	460.382	823.096
	2.16667		32.5488	356.437	826.473		42.3015	471.479	738.13
	2.25		18.1379	342.295	877.855		0	409.425	828.838
	2.33333		15.7465	400.549	863.63		33.36	431.8	919.521
	2.41667		45.2986	411.171	944.246		78.8362	394.655	955.208
	2.5		40.2913	354.457	958.59		0	454.631	992.323
	2.58333		38.9634	380.373	870.235		0	410.753	950.484
	2.66667		0	479.206	1029.5		41.3551	402.529	971.91
	2.75		4.3271	467.53	970.767		80.6661	476.144	1100.55
	2.83333		25.7313	400.555	1096.3		32.1593	482.757	1055.3
	2.91667		36.7553	414.003	1092.34		0	504.817	1101.73
	3		28.9746	431.307	1175.52		33.0264	504.138	1091.54
	3.08333		56.2536	491.048	1251.31		29.7968	593.866	1280.65
	3.16667		33.3385	472.147	1270.95		0	548.26	1206.03
	3.25		0.182	518.565	1340.06		34.4413	567.282	1352.87
	3.33333		36.3261	527.438	1438.25		0	706.017	1435.2
	3.41667		39.2068	512.69	1370.87		0	603.713	1463.45
	3.5		20.0636	496.926	1481.73		0	713.621	1704.68
	3.58333		18.948	556.933	1463.19		37.3811	676.388	1644
	3.66667		31.7121	634.986	1583.79		0	725.156	1736.66
	3.75		30.8773	625.304	1650.74		9.2092	747.465	1923.68
	3.83333		45.8818	705.481	1748.92		66.0684	595.383	2052.16
	3.91667		64.1768	743.902	1880.8		75.9503	779.616	2244.57
	4		52.0691	757.768	2147.18		0	920.196	2449.38
	4.08333		37.3694	742.409	2122.82		40.5691	894.666	2602.53
	4.16667		57.1477	833.575	2299.42		0	1000	2861.84
	4.25		78.9585	843.953	2598.23		0	1038.65	3103.22
	4.33333		69.7937	891.556	2701.55		62.1783	1065.94	3444.02
	4.41667		74.7613	966.12	3119.95		0	1276.3	3989.59
	4.5		81.2423	970.24	3417.11		54.3518	1367.74	4189.05
	4.58333		85.7464	1117.44	3581.64		132.399	1486.01	4707.01
	4.66667		98.5434	1245.05	4052.98		123.51	1748.98	5251.59
	4.75		101.094	1268.31	4535.37		139.358	1881.59	5738.37
	4.83333		128.946	1517.44	5016.76		285.725	2227.55	6334.54
	4.91667		155.971	1553.74	5693.37		373.435	2561.37	6853.49
	5		173.333	1895.42	6317.89		433.613	2783.01	7378.9
	5.08333		193.038	2025.04	6908.24		656.061	3217.12	7432.36
	5.16667		250.553	2262.48	7605.12		774.334	3451.7	7574.75
	5.25		271.118	2380.67	8403.1		913.514	3946.93	7571.14
	5.33333		326.108	2715.49	9044.02		975.887	4159.85	7522.61
	5.41667		353.185	3038.36	10139.8		1187.2	4470.57	7417.8
	5.5		416.135	3292.14	10391.9		1375.67	4705.96	7266.77
	5.58333		476.877	3566.49	11049.4		1556.81	4884.98	7133.1
	5.66667		515.811	3872.06	11992.5		1794.97	4958.01	7050.7
	5.75		637.724	4189.3	12301.1		1903.61	5006.49	6743.94
	5.83333		680.542	4472.18	12809.2		2173.88	4914.62	6300.33
	5.91667		775.844	4651.8	12985.9		2510.1	5070.71	5964.77
	6		822.735	5053.87	13279.4		2614.33	5197.4	5931.94
	6.08333		871.886	5223.9	13299.3		2540	5138.69	5610.11
	6.16667		912.2	5323.25	13151.7		2698.23	4887.14	5518.16
	6.25		918.463	5211.19	12982.1		2688.4	4879.46	5341.22
	6.33333		982.553	5479.29	13072.5		2686.96	5082.61	5127.2
	6.41667		992.801	5544.82	13125.3		2855.27	5050.44	4981.9
	6.5		1085.28	5616.03	13470.7		2924.71	5043.45	4972.19
	6.58333		999.859	5486.01	13271.8		3064.79	5078.56	4929
	6.66667		1035.31	5682.81	13634.6		2983.61	5103.83	5026.46
	6.75		1012.49	5753.07	13742.2		3073.09	5015.06	5099.09
	6.83333		1082.27	5700.8	13769.8		3219.87	5190.05	5254.53
	6.91667		1030.24	5480.65	13474.3		3039.09	5319.57	5195.82
	7		970.803	5496.66	13615.1		3156.6	5359.33	5175.38
	7.08333		971.521	5492.71	13486.3		3193.43	5435.3	5279.52
	7.16667		984.522	5311.94	13260.8		3106.01	5249.41	5225.02
	7.25		997.376	5486.21	13290.1		3157.55	5214.8	5241.13
	7.33333		1087.2	5348.78	13820.1		3174.67	5267.51	5321.74
	7.41667		1004.19	5394.12	13511.8		3283.57	5193.88	5457.43
	7.5		989.51	5459.87	13284.9		3236.01	5280.41	5324.79
	7.58333		971.308	5338	13177.1		3165.54	5329.95	5504.94
	7.66667		987.028	5340.72	13264.4		3121.62	5360.28	5654.07
	7.75		983.999	5294.4	13185.8		3035.98	5246.81	5624.88
	7.83333		972.262	5218.86	13323.6		3203.96	5302.46	5621.91
	7.91667		985.649	5175.72	13382.7		3356.68	5248.11	5543.24
	8		1014.35	5208.09	13577.5		3164.61	5422.4	5545.11
	8.08333		1018.8	5264.09	13604.3		3213.94	5410.69	5600.18
	8.16667		962.154	5268.27	13451.8		3170.51	5404.74	5544.23
	8.25		996.476	5287.12	13591.9		3174.92	5396.78	5560.3
	8.33333		997.261	5370.58	13436.4		3061.92	5320.54	5480.18
	8.41667		982.505	5183.7	13666.2		3258.82	5269.6	5511.94
	8.5		1009.2	4989.36	13562.7		3116.6	5283.74	5530.93
	8.58333		1028.96	5091.04	13636.6		2963.16	5310.92	5577
	8.66667		1051.69	5000.48	13395.9		3180.24	5216.72	5573.45
	8.75		1020.3	5120.08	13646.5		3181.23	5352.75	5387.08
	8.83333		1090.76	4944	13639.2		3120.47	5390.58	5279.74
	8.91667		1064.23	5130.24	13705		3037.21	5417.66	5343.79
	9		999.123	5002.45	13642.7		2995.43	5284.22	5482.49
	9.08333		912.19	4955.28	13650.9		2887.74	5201.31	5261.34
	9.16667		899.097	4808.84	13639.5		2935.47	5156	5475.02
	9.25		920.262	4883.45	13641.1		2942.72	5011.27	5493.67
	9.33333		889.144	4966.12	13500.2		3076.14	5075.78	5735.53
	9.41667		873.598	5006.55	13320.1		3088.86	5173.44	5722.53
	9.5		942.737	4862.66	13298.8		3108.36	5171.07	5870.95
	9.58333		930.028	4791.01	13049.1		3142.18	5358.31	5968.94
	9.66667		892.527	4744.13	12624.2		3101.33	5319.22	5981.25
	9.75		894.932	4805.51	12760.3		3183.91	5306.14	5782.81
	9.83333		952.559	4823.99	12645.7		3029.98	5392.51	5740.45
	9.91667		914.887	4796.04	12808.3		2925.29	5474.71	5747.74
	10		860.986	4805.81	12675		2909.4	5499.88	5646.64
	10.0833		883.142	4860.3	12894.7		2865.5	5612.57	5608.04
	10.1667		897.188	5023.67	12941.3		2771.59	5735.23	5600.82
	10.25		928.162	4954.9	13006		2804.16	5520.63	5437.12
	10.3333		908.053	5090.69	13114.9		2729.96	5462.92	5262.5
	10.4167		952.182	5001.51	12968.4		2800.28	5435.05	5293.92
	10.5		975.258	5081.43	12978.6		2791.79	5212.24	5462.71
	10.5833		974.416	5115.17	13251.8		2700.79	5417.76	5477.49
	10.6667		978.14	5086.34	13179.7		2810.42	5515.96	5691.18
	10.75		964.723	4936.7	13258.9		2846.11	5536.68	5770.95
	10.8333		946.903	4971.02	13111.2		2922.76	5378.89	5568.65
	10.9167		973.097	4895.86	12804.1		2804.5	5385.98	5876.39
	11		929.984	4872.72	12696.1		2857.98	5190.61	5802.48
	11.0833		994.939	4854.94	12734.7		2917.84	5285.94	5896.45
	11.1667		997.908	4723.94	12406.8		2898.3	5397.07	5938.4
	11.25		1022.5	4728.56	12257.6		3038.61	5463.27	5836.39
	11.3333		972.633	4940.3	12374.9		3016.86	5375.76	5907.22
	11.4167		989.232	4690.42	12582.7		2923.73	5336.65	5781.86
	11.5		1016.44	4743.54	12775.2		3109.55	5198.3	5912.31
	11.5833		976.516	4899.36	12937.5		3009.56	5252.81	5786.13
	11.6667		965.032	4800.85	12875.1		3019.15	5088.78	5865.66
	11.75		961.18	4666.03	12857.7		3138.95	4961.79	5836.69
	11.8333		974.308	4667.39	12867.4		3266.24	5207.05	5875.55
	11.9167		976.159	4674.73	12826.1		3289.14	5203.17	5980.68
	12		980.582	4647.58	12680.3		3417.19	5056.25	5817.29
	12.0833		947.371	4665.24	12663.8		3378.22	5036.04	5787.57
	12.1667		927.793	4679.03	12807.8		3358.26	5137.35	5997
	12.25		936.52	4660.22	12802.8		3433.3	5164.04	5989
	12.3333		908.058	4800.21	12463.6		3332.03	5070.8	6091.18
	12.4167		878.06	4653.13	12342.7		3296.41	5140.55	5996.38
	12.5		931.604	4597.52	12319.2		3192.73	5094.55	5965.82
	12.5833		864.982	4647.43	12436.8		3017.36	5252.36	5849.12
	12.6667		880.403	4537.7	12380.3		2930.23	5405.86	5802.26
	12.75		870.426	4708.23	12122.1		2825.58	5311.34	5704.94
	12.8333		901.541	4561.38	12238		2948.29	5457.75	5748.8
	12.9167		918.116	4519.81	12291.7		3010.37	5440.18	5807.26
	13		905.918	4464.78	12374.5		2972.68	5361.16	5993.83
	13.0833		955.207	4543.14	12388		2906.55	5420.52	5910.4
	13.1667		935.686	4560.89	12356.5		2924.96	5417.33	5759.34
	13.25		887.622	4521.68	12129.7		3066.62	5379.62	5814.6
	13.3333		911.915	4569.22	12146.4		3016.05	5427.89	5975.19
	13.4167		888.096	4439.82	12233.6		3091.86	5354.93	5920.8
	13.5		885.572	4469.82	12284.2		3149.09	5441.71	5915.87
	13.5833		891.493	4537.73	12045.1		3182.89	5473.18	6034.1
	13.6667		864.097	4528.01	12057.4		3255.63	5536.94	6103.56
	13.75		839.102	4540.43	11968		3268.33	5496.74	6088.91
	13.8333		863.57	4540.34	12182.5		3488.82	5383.31	6174
	13.9167		922.771	4553.76	12592.5		3541.48	5386.43	6144.67
	14		934.255	4643.63	12489.7		3534.5	5430.47	6228.72
	14.0833		1006.37	4627.93	12532.3		3725.26	5509.65	6187.49
	14.1667		957.988	4630.65	12693.1		3687.19	5455.32	6163.16
	14.25		996.541	4830.19	12669.4		3558.71	5533.36	6396.8
	14.3333		1009.74	4664.47	12580.2		3576.7	5512.68	6263.47
	14.4167		990.138	4707.75	12335.4		3471.98	5643.15	6228.38
	14.5		963.745	4635.95	12325.2		3431.92	5801.41	6189.75
	14.5833		984.231	4598.4	12196.8		3392.93	5712.51	6264.78
	14.6667		992.968	4499.86	12187.2		3318.36	5817.51	6410.97
	14.75		1006.03	4380.58	12150.9		3196.47	5750.8	6277.03
	14.8333		1022.69	4311.1	11983.6		3269.73	5648.37	6329.53
	14.9167		924.102	4384.4	11832.5		3267.67	5570.76	6175.8
	15		918.888	4506.63	11832.6		3243.48	5679	6194.14
	15.0833		850.066	4425.07	12146.9		3346.33	5808.23	6232.8
	15.1667		834.795	4512.36	12263.8		3414.55	5771.86	6171.53
	15.25		866.39	4622.65	12677.1		3514.35	5775.05	6067.42
	15.3333		888.459	4755.79	12533.2		3668.42	5817.78	6131.32
	15.4167		888.761	4690.61	12448.6		3786.39	5844.75	5988.2
	15.5		941.126	4812.3	12545.3		3725.48	5900.41	6108.22
	15.5833		888.257	4588.14	12540.2		3639.72	6029.92	6014.02
	15.6667		900.696	4593.12	12373.5		3673.9	6157.83	6056.53
	15.75		942.812	4579.18	12244.2		3633.08	6094.46	6036.09
	15.8333		999.4	4528.09	12365.3		3615.27	6154.07	6046.62
	15.9167		996.642	4542.41	12417.3		3650.68	6107.06	6111.06
	16		1035.43	4505.78	12589.6		3606.01	5927.89	6011.75
	16.0833		990.509	4459.68	12821.3		3515.64	6144.04	6059.62
	16.1667		991.724	4417.5	12961.1		3693.7	6193.33	6053.58
	16.25		1007.16	4561.83	13135.7		3811.27	6166.14	5973.36
	16.3333		964.29	4756.01	13433.5		3789.27	6325.15	6139.99
	16.4167		945.34	4806.19	13365.5		3990.45	6463.9	6253.33
	16.5		901.892	4791.16	13240.1		4073.66	6608.51	6312.7
	16.5833		869.786	4789.48	13145.8		4100.85	6796.12	6447.47
	16.6667		932.86	4780.61	12999		4179.46	6710.39	6547.66
	16.75		958.953	4837.1	12850.2		4090.6	6448.95	6534.63
	16.8333		946.524	4958.14	13120.7		4077.34	6559.84	6521.2
	16.9167		920.508	4588.46	13238.7		4102.09	6684.17	6512.91
	17		922.092	4790.98	13338.5		4109.9	6691.89	6569.45
	17.0833		883.153	4924.9	13293.8		4044.55	6741.33	6607.39
	17.1667		867.131	4933.27	13306		4051.2	6694.51	6603.62
	17.25		917.149	4826.12	12962.5		4001.42	6646.15	6377.98
	17.3333		980.138	4868.05	13017.1		3969.83	6738.03	6456.32
	17.4167		1020.02	4816.3	13196.9		4094.56	6736.93	6464.32
	17.5		978.202	4849.67	13416.4		4107.49	6793.03	6562.41
	17.5833		942.959	4873.21	13499.2		4054.24	6990.45	6610.47
	17.6667		963.965	4952.51	13126.4		4172.28	6895.66	6673.02
	17.75		974.367	4941.72	13059.6		4183.75	6822.67	6733.89
	17.8333		924.02	5011.98	13017.6		4209.28	6783.46	6676.57
	17.9167		926.026	4846.63	13051.1		4128.38	6757.29	6823.8
	18		871.372	4849.4	12854.2		3950.11	6777.71	6762.77
	18.0833		779.865	4839.29	13007.9		3748.98	6837.74	6638.7
	18.1667		724.96	4840.08	13195.1		3684.92	6705.41	6787.93
	18.25		728.398	4834.07	13274.7		3443.03	6730.04	6941.31
	18.3333		710.592	4562.04	13040.9		3213.85	6895.37	7096.79
	18.4167		643.468	4385.68	12837.6		3079.27	7020.29	7112.57
	18.5		577.774	4242.66	12667.4		2896.94	7132.94	7093.28
	18.5833		557.019	4076.39	12477.3		2580.74	7093.46	7384.54
	18.6667		491.269	3893.84	12149.8		2403.14	6939.34	7609.91
	18.75		417.767	3766.77	11583		2282.68	6793.32	7697.96
	18.8333		382.126	3584.74	11025.1		2041.83	6811.62	7892.84
	18.9167		354.461	3379.2	10585.4		1824.33	6623.08	8078.87
	19		336.461	3120.67	9916.51		1620.1	6231.79	8194.67
	19.0833		290.322	2953.94	9127.56		1521.02	5993.84	8229.77
	19.1667		239.247	2676.15	8317.72		1403.78	5833.9	8350.17
	19.25		186.557	2425.59	7626.59		1240.2	5515.26	8649.98
	19.3333		162.929	2282.99	6940.59		1047.05	5264.26	8841.45
	19.4167		160.741	2085.2	6237		910.306	4868.6	8756.68
	19.5		147.588	1878.76	5496.07		791.056	4339.89	8632.15
	19.5833		120.489	1737.86	4751		686.98	3929.85	8334.19
	19.6667		110.702	1527.22	4304.01		593.187	3674.97	7923.39
	19.75		88.5232	1375.1	3818.62		488.111	3308.24	7290.15
	19.8333		98.2944	1280.47	3405.78		422.57	3012.33	6694.23
	19.9167		100.653	1085.67	3177.03		367.455	2663.75	6175.5
	20		85.3368	1036.96	2897.38		382.419	2390.02	5520.41
	20.0833		89.6875	982.425	2637.14		306.702	2131.65	4795.06
	20.1667		56.527	860.534	2478.91		238.633	1911.57	4253.1
	20.25		57.0575	821.134	2243.35		274.065	1772.25	3943.25
	20.3333		75.0658	817.85	2118.04		245.835	1721.36	3591.46
	20.4167		71.4534	722.241	1999.57		231.686	1551.28	3248.28
	20.5		65.9184	694.866	1826.97		205.217	1444.74	2986.8
	20.5833		55.8041	665.185	1668.25		176.928	1360.3	2746.6
	20.6667		47.1398	639.549	1603.88		240.47	1340.01	2601.79
	20.75		45.3616	628.469	1544.8		231.936	1275.92	2428.17
	20.8333		47.9775	577.307	1531.05		133.802	1200.56	2182.51
	20.9167		32.2562	554.13	1424.23		142.45	1178.35	1943.37
	21		41.0136	529.808	1247.52		119.547	1132.87	1804.68
	21.0833		53.4445	496.51	1187.21		133.295	1090.31	1769.8
	21.1667		49.1392	488	1145		156.685	1059.42	1674.5
	21.25		44.6031	500.517	1122.76		129.715	998.909	1629.63
	21.3333		25.0689	501.4	1099.02		137.434	988.316	1526.22
	21.4167		25.3269	493.484	1069.92		145.406	1009.89	1367.48
	21.5		47.237	480.569	1015.21		144.475	971.569	1338.31
	21.5833		37.4772	460.946	1006.19		120.325	888.992	1324.3
	21.6667		14.4237	437.944	969.511		86.5397	882.6	1214.54
	21.75		23.9832	420.986	916.853		104.517	881.134	1205.4
	21.8333		27.6011	434.681	904.784		115.97	792.377	1168.08
	21.9167		18.9784	407.576	872.267		146.864	724.038	1064.86
	22		16.0842	382.736	773.279		115.568	679.817	1087.48
	22.0833		44.1393	406.76	799.82		52.1373	674.65	1111.17
	22.1667		47.5683	387.43	812.774		75.9042	676.908	1055.03
	22.25		29.4557	354.581	763.73		74.7687	719.767	1032.69
	22.3333		27.7294	399.144	725.609		19.7379	676.924	1020.43
	22.4167		9.239	413.573	702.902		29.7671	627.089	972.725
	22.5		12.5037	419.769	678.526		90.506	581.754	951.014
	22.5833		32.9073	459.498	695.05		93.9967	594.178	895.5
	22.6667		34.7652	491.178	635.871		56.9081	624.829	867.408
	22.75		43.7555	442.931	583.452		62.8979	579.698	823.683
	22.8333		37.7213	374.624	626.374		64.3341	544.69	751.109
	22.9167		26.3945	346.185	636.709		37.6231	487.098	791.085
	23		48.5994	340.32	629.598		21.1264	409.615	774.612
	23.0833		37.8869	343.681	604.005		57.3889	445.937	718.343
	23.1667		20.1804	329.138	599.419		70.667	457.963	742.782
	23.25		21.6474	307.854	579.191		74.8272	406.446	696.61
	23.3333		21.2602	306.248	556.4		48.1294	410.116	581.741
	23.4167		25.0798	283.377	570.775		53.7683	482.605	568.155
	23.5		29.4249	284.274	535.631		96.6152	456.501	578.172
	23.5833		27.6859	279.959	543.672		91.4137	405.929	580.987
	23.6667		17.4037	287.144	563.517		69.1994	375.474	575.139
	23.75		28.9902	307.556	556.02		14.9414	340.539	519.007
	23.8333		35.4664	299.9	556.515		5.8769	423.586	483.299
	23.9167		37.0987	315.141	500.201		43.0381	473.472	533.758
	24		40.1122	329.453	498.219		88.5085	453.594	496.46
	24.0833		33.8733	287.974	513.831		69.4442	363.745	397.521
	24.1667		21.2198	253.858	515.954		10.1218	312.598	403.82
	24.25		12.7515	274.825	507.763		16.8438	338.055	464.282
	24.3333		22.2453	278.538	484.291		51.6596	309.28	435.358
	24.4167		37.646	266.916	473.663		32.8334	324.924	439.996
	24.5		32.4888	269.322	453.368		0	370.268	457.723
	24.5833		20.9361	283.297	442.191		0	292.002	442.713
	24.6667		17.7629	252.359	449.159		11.6089	265.382	440.78
	24.75		0	226.153	432.51		0	248.002	375.391
