# Supplementary material for: The molecular mechanism of load adaptation by branched actin networks
Source: eLife. 2022 Jun 24;11:e73145. doi: 10.7554/eLife.73145 (PMC9328761; doi:10.7554/eLife.73145)
Supplement: Figure 5—source data 1. [file elife-73145-fig5-data1.xlsx]

## Sheet: Figure 5A
	Figure 5A
		30nM CP		55nM CP		100nM CP		180nM CP
	growth stress [Pa]	Actin:CP fluorescence ratio [au]	SD Actin:CP fluorescence ratio [au]	Actin:CP fluorescence ratio [au]	SD Actin:CP fluorescence ratio [au]	Actin:CP fluorescence ratio [au]	SD Actin:CP fluorescence ratio [au]	Actin:CP fluorescence ratio [au]	SD Actin:CP fluorescence ratio [au]
	25.5102	2.57143	0.45063	1.60407	0.5097	0.84899	0.02095	0.5005	0.1522
	51.0204	2.59618	0.44385	1.63106	0.47342	0.90469	0.04456	0.51604	0.15962
	102.041	2.56513	0.35861	1.67656	0.48075	0.96781	0.05303	0.52581	0.13931
	255.102	2.48886	0.34782	1.67146	0.40568	1.00397	0.07731	0.5508	0.11503
	510.204	2.30396	0.27123	1.54509	0.29041	1.00168	0.12358	0.58618	0.07684
	765.306	2.10133	0.19318	1.5198	0.28541	0.97067	0.1555	0.5836	0.06283
	1020.41	1.97314	0.19436	1.46459	0.27746	0.95731	0.20588	0.56737	0.0665

## Sheet: Figure 5E
	Figure 5E
		Actin fluorescence		CP (wt) fluorescence		GST-CP fluorescence
	growth stress [Pa]	Normalized actin fluorescence [au]	SD Normalized actin fluorescence [au]	Normalized CP (wt) fluorescence [au]	SD Normalized CP (wt) fluorescence [au]	Normalized GST-CP fluorescence [au]	SD Normalized GST-CP fluorescence [au]
	0	1	0	1	0	1	0
	25.5102	1.22669	0.06655	1.25355	0.15157	1.1462	0.0707
	51.0204	1.44478	0.08844	1.4573	0.18725	1.2914	0.07631
	102.041	1.90924	0.18326	1.85685	0.32778	1.53395	0.13242
	255.102	3.36139	0.34303	3.09881	0.48226	2.06941	0.21584
	382.653	4.62928	0.42137	4.15934	0.65079	2.35327	0.32996
	510.204	5.79154	0.59781	5.08228	0.54591	2.50756	0.3422
	765.306	8.18641	0.70092	7.01262	0.84996	2.59062	0.35824
	1020.41	10.5725	0.90824	8.86717	0.79971	2.56123	0.6422

## Sheet: Figure 5F
	Figure 5F
	experimental data
	growth stress[Pa]	normalized fluorescence ratio GST-CP/CP(wt)	SD normalized fluorescence ratio GST-CP/CP(wt)
	0	1	0
	25.5102	0.91436	0.12411
	51.0204	0.88616	0.12533
	102.041	0.8261	0.16233
	255.102	0.66781	0.12511
	382.653	0.56578	0.11887
	510.204	0.49339	0.08569
	765.306	0.36942	0.06793
	1020.41	0.28884	0.07697
	numerical result from brownian ratchet model
	growth stress[Pa]	ratio capping rates GST-CP/CP(wt)
	0	1
	25.5102	0.93013
	51.0204	0.90015
	102.041	0.80814
	255.102	0.66473
	510.204	0.47606
	765.306	0.38421
	1020.41	0.27318
